# Supplementary material
Source: publisher figshare collection journal article supplement (https://acs.figshare.com/ndownloader/files/4600861)

# Highly Regioselective Protection of Sugars Catalyzed by Dimethyltin Dichloride

Yosuke Demizu, Yuki Kubo, Hiroko Miyoshi, Toshihide Maki, Yoshihiro Matsumura,  
Noriaki Moriyama, and Osamu Onomura\*

*Graduate School of Biomedical Sciences, Nagasaki University, 1-14 Bunkyo-machi, Nagasaki  
852-8521, Japan*

## Supporting Information (*Organic Letters*)

### *Table of Contents*

|                                                                                                                    |         |
|--------------------------------------------------------------------------------------------------------------------|---------|
| General .....                                                                                                      | S2      |
| Experimental procedure for monobenzoylation of sugars .....                                                        | S2—S5   |
| Experimental procedure for monotosylation of sugars .....                                                          | S5—S9   |
| Experimental procedure for complete protection of $\alpha$ -methyl glucoside and $\beta$ -methyl xyloside<br>..... | S9—S12  |
| Chemical transformation of $\alpha$ -methyl glucoside derivative <b>5</b> .....                                    | S12—S14 |
| References .....                                                                                                   | S14—S15 |
| $^1\text{H}$ and $^{13}\text{C}$ NMR chart.....                                                                    | S16—S45 |

**General:**  $^1\text{H}$  NMR spectra were measured on a Varian Gemini 300, 400 and 500 spectrometer with TMS as an internal standard.  $^{13}\text{C}$  NMR spectra were measured on a Varian Gemini 300 and 400 spectrometer with TMS as an internal standard. IR spectra were obtained on a Shimadzu FTIR-8100A. Mass spectra were obtained on a JEOL JMS-DX 303 instrument. All reagents and solvents were used as supplied without further purification.

### Experimental Procedure for Monobenzoylation of Sugar 1a

BzCl (64  $\mu\text{L}$ , 0.55 mmol) was added to the stirred solution of  $\alpha$ -methyl glucoside (**1a**) (97 mg, 0.5 mmol),  $\text{Me}_2\text{SnCl}_2$  (5.5 mg, 0.025 mmol) and DIPEA (174  $\mu\text{L}$ , 1.0 mmol) in THF (2.0 mL) and then stirred for 2.5 h at rt. 3% aqueous HCl (20 mL) was added to the solution and extracted with EtOAc (20 mL x 3), and then dried over  $\text{MgSO}_4$ . Removal of the solvent afforded an oily residue, which was purified by column chromatography on silica gel (50% EtOAc in hexane) to afford **2a** (122 mg, 82%) as a white solid.

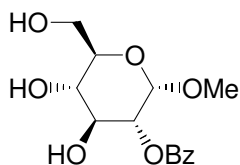

**Methyl  $O^2$ -benzoyl- $\alpha$ -D-glucoside (**2a**)**<sup>S1</sup>:  $^1\text{H}$  NMR (300 MHz,  $\text{CDCl}_3$ )  $\delta$  8.09

(d,  $J$  = 6.9 Hz, 2H), 7.60 (t,  $J$  = 7.5 Hz, 1H), 7.47 (t,  $J$  = 7.5 Hz, 2H), 5.04 (d,  $J$  = 3.6 Hz, 1H), 4.91 (dd,  $J$  = 3.6, 9.9 Hz, 1H), 4.16 (t,  $J$  = 3.6 Hz, 1H), 3.92—3.89

(m, 2H), 3.75—3.72 (m, 2H), 3.40 (s, 3H), 2.62 (br s, 1H), 2.50 (br s, 1H), 2.00 (br s, 1H).

### Experimental Procedure for Monobenzoylation of Sugar 1b

BzCl (64  $\mu\text{L}$ , 0.55 mmol) was added to the stirred solution of  $\beta$ -methyl glucoside (**1b**) (97 mg, 0.5 mmol),  $\text{Me}_2\text{SnCl}_2$  (5.5 mg, 0.025 mmol) and DIPEA (174  $\mu\text{L}$ , 1.0 mmol) in THF (2.0 mL) and then stirred for 2.5 h at rt. 3% aqueous HCl (20 mL) was added to the solution and extracted with EtOAc (20 mL x 3), and then dried over  $\text{MgSO}_4$ . Removal of the solvent afforded an oily residue, which was purified by column chromatography on silica gel (50% EtOAc in hexane) to afford **2b** (118 mg, 79%) as a white solid.

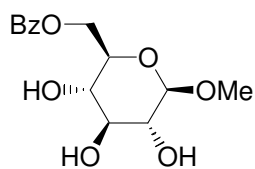

**Methyl *O*<sup>6</sup>-benzoyl- $\beta$ -D-glucoside (**2b**)**<sup>S2</sup>: <sup>1</sup>H NMR (400 MHz, CDCl<sub>3</sub>)  $\delta$  8.00 (d, *J* = 7.8 Hz, 2H), 7.50 (t, *J* = 7.3 Hz, 1H), 7.38 (t, *J* = 7.3 Hz, 2H), 5.06 (s, 1H), 4.63 (d, *J* = 11.2 Hz, 2H), 4.55—4.38 (m, 2H), 4.21 (d, *J* = 7.3 Hz, 1H), 3.59 (d, *J* = 7.8 Hz, 2H), 3.56—3.34 (m, 4H), 2.78 (s, 1H).

### Experimental Procedure for Monobenzoylation of Sugar **1c**

BzCl (64  $\mu$ L, 0.55 mmol) was added to the stirred solution of  $\alpha$ -methyl galactoside (**1c**) (97 mg, 0.5 mmol), Me<sub>2</sub>SnCl<sub>2</sub> (5.5 mg, 0.025 mmol) and DIPEA (174  $\mu$ L, 1.0 mmol) in THF (2.0 mL) and then stirred for 2.5 h at rt. 3% aqueous HCl (20 mL) was added to the solution and extracted with EtOAc (20 mL x 3), and then dried over MgSO<sub>4</sub>. Removal of the solvent afforded an oily residue, which was purified by column chromatography on silica gel (50% EtOAc in hexane) to afford **2c** (115 mg, 84%) as a white solid.

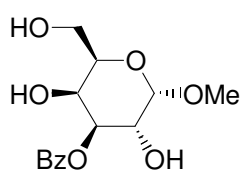

**Methyl *O*<sup>3</sup>-benzoyl- $\alpha$ -D-galactoside (**2c**)**<sup>S2</sup>: <sup>1</sup>H NMR (300 MHz, CDCl<sub>3</sub>)  $\delta$  8.07 (d, *J* = 7.2 Hz, 2H), 7.55 (t, *J* = 7.8 Hz, 1H), 7.41 (t, *J* = 7.8 Hz, 2H), 5.27 (dd, *J* = 2.7, 10.5 Hz, 1H), 4.87 (d, *J* = 3.9 Hz, 1H), 4.25 (s, 1H), 4.21—4.18 (m, 1H), 3.85 (s, 3H), 3.42 (s, 4H), 2.97 (br s, 1H), 2.40 (d, *J* = 9.9 Hz, 1H).

### Experimental Procedure for Monobenzoylation of Sugar **1d**

BzCl (64  $\mu$ L, 0.55 mmol) was added to the stirred solution of  $\beta$ -methyl galactoside (**1d**) (97 mg, 0.5 mmol), Me<sub>2</sub>SnCl<sub>2</sub> (5.5 mg, 0.025 mmol) and DIPEA (174  $\mu$ L, 1.0 mmol) in THF (2.0 mL) and then stirred for 2.5 h at rt. 3% aqueous HCl (20 mL) was added to the solution and extracted with EtOAc (20 mL x 3), and then dried over MgSO<sub>4</sub>. Removal of the solvent afforded an oily residue, which was purified by column chromatography on silica gel (50% EtOAc in hexane) to afford **2d** (135 mg, 91%) as a white solid.

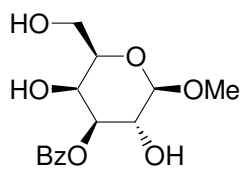

**Methyl *O*<sup>3</sup>-benzoyl- $\beta$ -D-galactoside (**2d**)**<sup>S3</sup>: <sup>1</sup>H NMR (300 MHz, CDCl<sub>3</sub>)  $\delta$  8.12—8.09 (m, 2H), 7.62—7.56 (m, 1H), 7.49—7.43 (m, 2H), 5.31 (dd, *J* = 3.0, 10.5 Hz, 1H), 4.96 (d, *J* = 4.2 Hz, 1H), 4.32 (s, 1H), 4.23 (dd, *J* = 4.2, 10.5 Hz, 1H), 4.01—3.82 (m, 3H), 3.50 (s, 3H), 2.80 (br s, 1H), 2.43 (br s, 1H), 1.62 (br s, 1H).

### Experimental Procedure for Monobenzoylation of Sugar **1e**

BzCl (64  $\mu$ L, 0.55 mmol) was added to the stirred solution of  $\alpha$ -methyl mannoside (**1e**) (97 mg, 0.5 mmol), Me<sub>2</sub>SnCl<sub>2</sub> (5.5 mg, 0.025 mmol) and DIPEA (174  $\mu$ L, 1.0 mmol) in THF/H<sub>2</sub>O = 9/1 (2.0 mL) and then stirred for 2.5 h at rt. 3% aqueous HCl (20 mL) was added to the solution and extracted with EtOAc (20 mL x 3), and then dried over MgSO<sub>4</sub>. Removal of the solvent afforded an oily residue, which was purified by column chromatography on silica gel (50% EtOAc in hexane) to afford **2e** (144 mg, 97%) as a white solid.

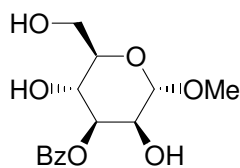

**Methyl *O*<sup>3</sup>-benzoyl- $\alpha$ -D-mannoside (**2e**)**<sup>S4</sup>: <sup>1</sup>H NMR (300 MHz, CDCl<sub>3</sub>)  $\delta$  8.06 (d, *J* = 7.2 Hz, 2H), 7.50 (t, *J* = 8.1 Hz, 1H), 7.27 (t, *J* = 8.1 Hz, 2H), 5.28 (d, *J* = 9.9 Hz, 1H), 4.64 (s, 1H), 4.29—4.20 (m, 1H), 4.12—4.01 (m, 2H), 3.89 (br s, 1H), 3.81—3.65 (m, 3H), 3.67 (d, *J* = 9.6 Hz, 1H), 3.29 (s, 3H).

### Experimental Procedure for Monobenzoylation of Sugar **1f**

BzCl (64  $\mu$ L, 0.55 mmol) was added to the stirred solution of  $\beta$ -methyl xyloside (**1f**) (82 mg, 0.5 mmol), Me<sub>2</sub>SnCl<sub>2</sub> (5.5 mg, 0.025 mmol) and DIPEA (174  $\mu$ L, 1.0 mmol) in THF/H<sub>2</sub>O = 9/1 (2.0 mL) and then stirred for 2.5 h at rt. 3% aqueous HCl (20 mL) was added to the solution and extracted with EtOAc (20 mL x 3), and then dried over MgSO<sub>4</sub>. Removal of the solvent afforded an oily residue, which was purified by column chromatography on silica gel (50% EtOAc in hexane) to afford **2f** (129 mg, 96%) as a white solid.

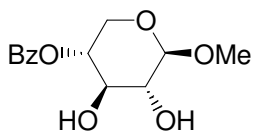

**Methyl *O*<sup>4</sup>-benzoyl- $\beta$ -D-xyloside (2f):** White solid; mp = 84—85 °C; IR

(neat) 3584, 2800, 1720, 1451, 1320, 1271  $\text{cm}^{-1}$ ;  $[\alpha]_{\text{D}}^{21} = -81.4$  (*c* 1.0,

$\text{CHCl}_3$ );  $^1\text{H}$  NMR (300 MHz,  $\text{CDCl}_3$ )  $\delta$  8.04 (d, *J* = 7.2 Hz, 2H), 7.60 (t, *J* = 8.1 Hz, 1H), 7.46 (t, *J* = 8.1 Hz, 2H), 5.12—5.05 (m, 1H), 4.41 (d, *J* = 5.7 Hz, 1H), 4.23 (dd, *J* = 4.2, 13.5 Hz, 1H), 3.61—3.50 (m, 6H), 3.05 (d, *J* = 4.8 Hz, 1H), 2.68 (d, *J* = 4.8 Hz, 1H);  $^{13}\text{C}$  NMR (75 MHz,  $\text{CDCl}_3$ )  $\delta$  166.0, 133.4, 129.7, 129.4, 128.5, 103.4, 72.4, 71.9, 61.6, 56.8; [HR-FAB(+)] : *m/z* calcd for  $\text{C}_{13}\text{H}_{17}\text{O}_6$   $[\text{M}+\text{H}]^+$  269.1025 : found 269.1028.

### Experimental Procedure for Monobenzoylation of Sugar 1g

BzCl (64  $\mu\text{L}$ , 0.55 mmol) was added to the stirred solution of  $\alpha$ -methyl rhamnoside (**1g**) (89 mg, 0.5 mmol),  $\text{Me}_2\text{SnCl}_2$  (5.5 mg, 0.025 mmol) and DIPEA (174  $\mu\text{L}$ , 1.0 mmol) in THF/ $\text{H}_2\text{O}$  = 9/1 (2.0 mL) and then stirred for 2.5 h at rt. 3% aqueous HCl (20 mL) was added to the solution and extracted with EtOAc (20 mL x 3), and then dried over  $\text{MgSO}_4$ . Removal of the solvent afforded an oily residue, which was purified by column chromatography on silica gel (50% EtOAc in hexane) to afford **2g** (135 mg, 96%) as a white solid.

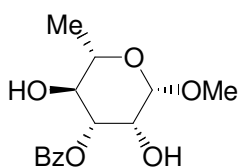

**Methyl *O*<sup>3</sup>-benzoyl- $\alpha$ -L-rhamnoside (2g):** Amorphous; mp = 34—35 °C; IR

(neat) 3450, 2975, 1719, 1601, 1453, 1283  $\text{cm}^{-1}$ ;  $[\alpha]_{\text{D}}^{17} = -54.0$  (*c* 1.0,

$\text{CHCl}_3$ );  $^1\text{H}$  NMR (400 MHz,  $\text{CDCl}_3$ )  $\delta$  8.02 (d, *J* = 7.3 Hz, 2H), 7.52—7.48 (m, 1H), 7.47—7.30 (m, 2H), 5.22—5.10 (m, 1H), 4.61 (s, 1H), 4.09 (s, 1H), 3.77—3.70 (m, 2H), 3.33 (s, 3H), 3.00 (s, 2H), 1.33 (s, 3H);  $^{13}\text{C}$  NMR (75 MHz,  $\text{CDCl}_3$ )  $\delta$  166.7, 133.2, 129.7, 129.5, 128.3, 100.6, 75.2, 71.0, 69.4, 68.3, 54.7, 17.4; [HR-FAB(+)] : *m/z* calcd for  $\text{C}_{14}\text{H}_{19}\text{O}_6$   $[\text{M}+\text{H}]^+$  283.1181 : found 283.1198.

### Experimental Procedure for Monotosylation of Sugar 2a

TsCl (105 mg, 0.55 mmol) was added to the stirred solution of methyl *O*<sup>2</sup>-benzoyl- $\alpha$ -D-glucoside (**2a**) (149 mg, 0.5 mmol),  $\text{Me}_2\text{SnCl}_2$  (5.5 mg, 0.025 mmol) and DIPEA (174  $\mu\text{L}$ , 1.0 mmol) in THF

(2.0 mL) and then stirred for 22 h at rt. 3% aqueous HCl (20 mL) was added to the solution and extracted with EtOAc (20 mL x 3), and then dried over MgSO<sub>4</sub>. Removal of the solvent afforded an oily residue, which was purified by column chromatography on silica gel (25% EtOAc in hexane) to afford **3a** (199 mg, 88%) as a white solid.

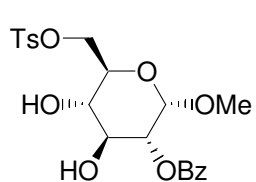

**Methyl *O*<sup>2</sup>-benzoyl-*O*<sup>6</sup>-*p*-toluenesulfonyl- $\alpha$ -D-glucoside (**3a**):** White solid;

mp 65—67°C; IR (neat) 3515, 2982, 2938, 1752, 1728, 1453 cm<sup>-1</sup>; [ $\alpha$ ]<sub>D</sub><sup>22</sup> = +109.5 (*c* 1.0, EtOH); <sup>1</sup>H NMR (300 MHz, CDCl<sub>3</sub>)  $\delta$  8.07 (d, *J* = 7.2 Hz, 2H), 7.83 (d, *J* = 8.4 Hz, 2H), 7.59 (t, *J* = 7.8 Hz, 1H), 7.46 (t, *J* = 7.8 Hz, 2H), 7.36 (d, *J* = 8.1 Hz, 2H), 4.96 (d, *J* = 1.6 Hz, 1H), 4.86 (dd, *J* = 1.2, 9.9 Hz, 1H), 4.41—4.26 (m, 2H), 4.14—4.07 (m, 1H), 3.85—3.80 (m, 1H), 3.62—3.58 (m, 1H), 3.34 (s, 3H), 2.75 (d, *J* = 3.6 Hz, 1H), 2.52 (d, *J* = 3.6 Hz, 1H), 2.46 (s, 3H); <sup>13</sup>C NMR (75 MHz, CDCl<sub>3</sub>)  $\delta$  166.4, 145.0, 129.9, 129.8, 128.4, 127.9, 100.6, 97.1, 73.5, 71.6, 70.1, 69.0, 55.4, 21.6; MS [HR-EI(+)] : *m/z* calcd for C<sub>21</sub>H<sub>24</sub>O<sub>9</sub>S [M]<sup>+</sup> 452.1141, found: 452.1157.

### Experimental Procedure for Monotosylation of Sugar **2c**

TsCl (105 mg, 0.55 mmol) was added to the stirred solution of methyl *O*<sup>3</sup>-benzoyl- $\alpha$ -D-galactoside (**2c**) (149 mg, 0.5 mmol), Me<sub>2</sub>SnCl<sub>2</sub> (5.5 mg, 0.025 mmol) and DIPEA (174  $\mu$ L, 1.0 mmol) in THF (2.0 mL) and then stirred for 22 h at rt. 3% aqueous HCl (20 mL) was added to the solution and extracted with EtOAc (20 mL x 3), and then dried over MgSO<sub>4</sub>. Removal of the solvent afforded an oily residue, which was purified by column chromatography on silica gel (25% EtOAc in hexane) to afford **3c** (147 mg, 65%) as a white solid.

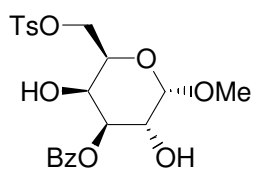

**Methyl *O*<sup>3</sup>-benzoyl-*O*<sup>6</sup>-*p*-toluenesulfonyl- $\alpha$ -D-galactoside (**3c**):** White solid;

mp 66—68°C; IR (neat) 3650, 3065, 2998, 2955, 2911, 2842, 1719, 1453 cm<sup>-1</sup>; [ $\alpha$ ]<sub>D</sub><sup>22</sup> = +127.1 (*c* 0.76, CHCl<sub>3</sub>); <sup>1</sup>H NMR (300 MHz, CDCl<sub>3</sub>)  $\delta$  8.07 (d, *J* = 3.5 Hz, 2H), 7.80 (d, *J* = 3.5 Hz, 2H), 7.58 (t, *J* = 3.5 Hz, 1H), 7.45 (t, *J* = 3.5 Hz, 2H), 7.35 (d, *J* = 3.5 Hz, 2H), 5.26 (dd, *J* = 1.1, 3.5 Hz, 1H), 4.82 (d, *J* = 1.3 Hz, 1H), 4.28—4.08 (m, 5H), 3.42 (s,

3H), 2.44 (s, 3H), 2.29 (s, 1H), 2.09 (d,  $J = 9.0$  Hz, 1H);  $^{13}\text{C}$  NMR (75 MHz,  $\text{CDCl}_3$ )  $\delta$  166.2, 145.1, 133.5, 132.6, 129.9, 129.85, 129.4, 128.5, 127.99, 99.6, 73.4, 68.2, 67.8, 67.7, 67.1, 55.7, 21.6; MS[HR-FAB(+)] :  $m/z$  calcd for  $\text{C}_{21}\text{H}_{25}\text{O}_9\text{S}[\text{M}+\text{H}]^+$ : 453.1219, found: 453.1201.

### Experimental Procedure for Monotosylation of Sugar 2e

TsCl (105 mg, 0.55 mmol) was added to the stirred solution of methyl  $O^3$ -benzoyl- $\alpha$ -D-mannoside (**2e**) (149 mg, 0.5 mmol),  $\text{Me}_2\text{SnCl}_2$  (5.5 mg, 0.025 mmol), DMAP (6.1 mg, 0.05 mmol) and DIPEA (174  $\mu\text{L}$ , 1.0 mmol) in THF (2.0 mL) and then stirred for 22 h at rt. 3% aqueous HCl (20 mL) was added to the solution and extracted with EtOAc (20 mL x 3), and then dried over  $\text{MgSO}_4$ . Removal of the solvent afforded an oily residue, which was purified by column chromatography on silica gel (25% EtOAc in hexane) to afford **3e** (192 mg, 85%) as a white solid.

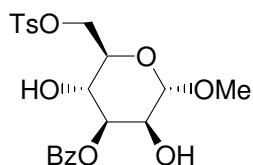

**Methyl  $O^3$ -benzoyl- $O^6$ - $p$ -toluenesulfonyl- $\alpha$ -D-mannoside (**3e**):** Amorphous;

IR (neat) 3509, 2998, 1771, 1721, 1599, 1453, 1362  $\text{cm}^{-1}$ ;  $[\alpha]_{\text{D}}^{19} = +35.2$  ( $c$

1.0,  $\text{CHCl}_3$ );  $^1\text{H}$  NMR (300 MHz,  $\text{CDCl}_3$ )  $\delta$  8.08 (d,  $J = 8.1$  Hz, 2H), 7.81 (d,  $J$

$= 7.8$  Hz, 2H), 7.58 (t,  $J = 7.8$  Hz, 1H), 7.45 (t,  $J = 7.8$  Hz, 2H), 7.34 (d,  $J = 7.8$  Hz, 2H), 5.28 (dd,  $J = 4.8, 9.6$  Hz, 1H), 4.72 (s, 1H), 4.42—4.29 (m, 2H), 4.19—4.02 (m, 2H), 3.88—3.73 (m, 1H), 3.36 (s, 3H), 2.80 (d,  $J = 5.4$  Hz, 1H), 2.44 (s, 3H), 2.32 (d,  $J = 6.0$  Hz, 1H);  $^{13}\text{C}$  NMR (75 MHz,  $\text{CDCl}_3$ )  $\delta$  166.7, 144.9, 133.3, 132.6, 129.9, 129.8, 129.4, 128.4, 127.9, 100.7, 74.9, 70.4, 69.1, 65.0, 55.1, 21.5; [HR-EI(+)] :  $m/z$  calcd for  $\text{C}_{21}\text{H}_{24}\text{O}_9\text{S} [\text{M}]^+$  452.1141: found 452.1124.

### Experimental Procedure for Monotosylation of Sugar 2f

TsCl (105 mg, 0.55 mmol) was added to the stirred solution of methyl  $O^4$ -benzoyl- $\beta$ -D-xyloside (**2f**) (134 mg, 0.5 mmol),  $\text{Me}_2\text{SnCl}_2$  (5.5 mg, 0.025 mmol) and DIPEA (174  $\mu\text{L}$ , 1.0 mmol) in THF (2.0 mL) and then stirred for 22 h at rt. 3% aqueous HCl (20 mL) was added to the solution and extracted with EtOAc (20 mL x 3), and then dried over  $\text{MgSO}_4$ . Removal of the solvent afforded

an oily residue, which was purified by column chromatography on silica gel (25% EtOAc in hexane) to afford **3f** (55 mg, 26%) and **3f'** (80 mg, 38%) as a white solid.

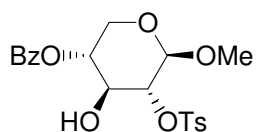

**Methyl *O*<sup>2</sup>-*p*-toluenesulfonyl-*O*<sup>4</sup>-benzoyl- $\beta$ -D-xyloside (**3f**):** White solid; mp = 71—72 °C; IR (neat) 3500, 1720, 1599, 1453, 1362, 1271 cm<sup>-1</sup>; [ $\alpha$ ]<sub>D</sub><sup>19</sup> = —96.6 (*c* 0.82, CHCl<sub>3</sub>); <sup>1</sup>H NMR (400 MHz, CDCl<sub>3</sub>)  $\delta$  8.04 (d, *J* = 7.3 Hz, 2H), 7.76 (d, *J* = 7.8 Hz, 2H), 7.57 (t, *J* = 7.8 Hz, 1H), 7.42 (t, *J* = 7.8 Hz, 2H), 7.29—7.26 (m, 2H), 5.04—4.92 (m, 1H), 4.62—4.55 (m, 1H), 4.43—4.40 (m, 1H), 4.25—4.16 (m, 1H), 3.92—3.80 (m, 1H), 3.65—3.50 (m, 1H), 3.38 (s, 3H), 3.30—3.20 (m, 1H), 2.43 (s, 3H); <sup>13</sup>C NMR (75 MHz, CDCl<sub>3</sub>)  $\delta$  165.8, 133.3, 129.9, 129.7, 128.4, 128.1, 100.0, 70.2, 69.0, 59.7, 56.4, 21.7; [HR-EI(+)]: *m/z* calcd for C<sub>20</sub>H<sub>22</sub>O<sub>8</sub>S [M]<sup>+</sup> 422.1035 : found 422.1057.

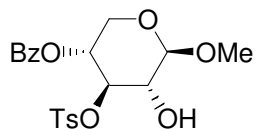

**Methyl *O*<sup>3</sup>-*p*-toluenesulfonyl-*O*<sup>4</sup>-benzoyl- $\beta$ -D-xyloside (**3f'**):** White solid; mp = 104—105 °C; IR (CHCl<sub>3</sub>) 3503, 2924, 1724, 1599, 1453, 1352, 1269 cm<sup>-1</sup>; [ $\alpha$ ]<sub>D</sub><sup>19</sup> = —128.2 (*c* 0.8, CHCl<sub>3</sub>); <sup>1</sup>H NMR (400 MHz, CDCl<sub>3</sub>)  $\delta$  8.00 (d, *J* = 7.8 Hz, 2H), 7.80 (d, *J* = 8.3 Hz, 2H), 7.59 (t, *J* = 7.3 Hz, 1H), 7.44 (t, *J* = 7.8 Hz, 2H), 7.06 (d, *J* = 7.8 Hz, 2H), 5.30—5.15 (m, 1H), 4.95 (t, *J* = 9.3 Hz, 1H), 4.30 (d, *J* = 7.3 Hz, 1H), 4.22 (dd, *J* = 5.8, 11.7 Hz, 1H), 3.65—3.58 (m, 1H), 3.55 (s, 3H), 3.38 (t, *J* = 11.2 Hz, 1H), 2.89 (s, 1H), 2.26 (s, 3H); <sup>13</sup>C NMR (75 MHz, CDCl<sub>3</sub>)  $\delta$  165.2, 144.6, 133.4, 129.9, 129.5, 128.9, 128.3, 127.6, 104.0, 81.8, 71.9, 69.2, 62.4, 57.2, 21.5; [HR-EI(+)]: *m/z* calcd for C<sub>20</sub>H<sub>22</sub>O<sub>8</sub>S [M]<sup>+</sup> 422.1035 : found 422.0992.

## Experimental Procedure for Monotosylation of Sugar **2g**

TsCl (105 mg, 0.55 mmol) was added to the stirred solution of methyl *O*<sup>3</sup>-benzoyl- $\alpha$ -L-rhamnoside (**2g**) (141 mg, 0.5 mmol), Me<sub>2</sub>SnCl<sub>2</sub> (5.5 mg, 0.025 mmol) and DIPEA (174  $\mu$ L, 1.0 mmol) in THF (2.0 mL) and then stirred for 22 h at rt. 3% aqueous HCl (20 mL) was added to the solution and extracted with EtOAc (20 mL x 3), and then dried over MgSO<sub>4</sub>. Removal of the solvent afforded

an oily residue, which was purified by column chromatography on silica gel (25% EtOAc in hexane) to afford **3g** (109 mg, 50%) as a white solid.

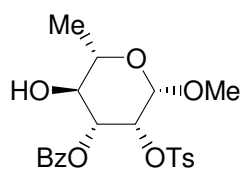

**Methyl *O*<sup>2</sup>-*p*-toluenesulfonyl-*O*<sup>3</sup>-benzoyl- $\alpha$ -L-rhamnoside (**3g**):** White solid;

mp = 127—129 °C; IR (neat) 3534, 2978, 1725, 1599, 1453, 1364, 1275, 1190  $\text{cm}^{-1}$ ;  $[\alpha]_{\text{D}}^{22} = +3.5$  (*c* 1.5,  $\text{CHCl}_3$ );  $^1\text{H}$  NMR (500 MHz,  $\text{CDCl}_3$ )  $\delta$  7.84 (d, *J* =

7.5 Hz, 2H), 7.66 (d, *J* = 8.5 Hz, 2H), 7.57 (t, *J* = 7.5 Hz, 1H), 7.40 (t, *J* = 7.5 Hz, 2H), 6.98 (d, *J* = 8.0 Hz, 2H), 5.20 (dd, *J* = 7.5, 9.5 Hz, 1H), 4.85—4.83 (m, 1H), 4.79 (s, 1H), 3.81—3.72 (m, 2H), 3.39 (s, 3H), 2.38 (br s, 1H), 2.17 (s, 3H), 1.30 (s, 3H);  $^{13}\text{C}$  NMR (75 MHz,  $\text{CDCl}_3$ )  $\delta$  165.8, 144.8, 133.3, 132.7, 129.8, 129.1, 128.2, 127.8, 127.1, 98.6, 72.1, 70.4, 68.2, 55.1, 21.5, 17.4; [HR-FAB(+)]: *m/z* calcd for  $\text{C}_{21}\text{H}_{25}\text{O}_8\text{S}$  [*M*+*H*]<sup>+</sup> 437.1270 : found 437.1285.

## Experimental Procedure for Complete Protection of $\alpha$ -Methyl Glucoside and $\beta$ -Methyl Xyloside

$\text{Boc}_2\text{O}$  (120 mg, 0.55 mmol) was added to the stirred solution of methyl *O*<sup>2</sup>-benzoyl-*O*<sup>6</sup>-*p*-toluenesulfonyl- $\alpha$ -D-glucoside (**3a**) (226 mg, 0.5 mmol),  $\text{Me}_2\text{SnCl}_2$  (5.5 mg, 0.025 mmol), DMAP (67 mg, 0.55 mmol) and DIPEA (174  $\mu\text{L}$ , 1.0 mmol) in THF (2.0 mL) and then stirred for 30 min at rt. 3% aqueous HCl (20 mL) was added to the solution and extracted with EtOAc (20 mL x 3), and then dried over  $\text{MgSO}_4$ . Removal of the solvent afforded an oily residue, which was purified by column chromatography on silica gel (15% EtOAc in hexane) to afford **4** (257 mg, 93%) as a white solid.

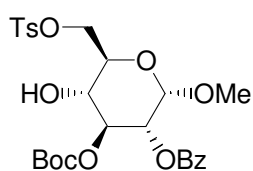

**Methyl *O*<sup>2</sup>-benzoyl-*O*<sup>3</sup>-*t*-butoxycarbonyl-*O*<sup>6</sup>-*p*-toluenesulfonyl- $\alpha$ -D-**

**glucoside (**4**):** White solid; mp 67—69°C; IR (neat) 3513, 2988, 2983, 1752,

1728, 1453  $\text{cm}^{-1}$ ;  $[\alpha]_{\text{D}}^{22} = +107.1$  (*c* 0.4,  $\text{CHCl}_3$ );  $^1\text{H}$  NMR (300 MHz,

$\text{CDCl}_3$ )  $\delta$  8.06 (t, *J* = 6.9 Hz, 2H), 7.82 (d, *J* = 8.4 Hz, 2H), 7.61—7.52 (m, 1 H), 7.43 (t, *J* = 8.7 Hz, 2H), 7.41—7.35 (m, 2H), 5.28 (t, *J* = 9.3 Hz, 0.5H), 5.04 (d, *J* = 3.8 Hz, 0.5H), 4.93 (d, *J* = 3.8 Hz, 0.5H), 4.92—4.84 (m, 1H), 4.64 (t, *J* = 9.3 Hz, 0.5H), 4.41—4.20 (m, 2H), 4.23—4.20 (m, 0.5H),

4.01—3.97 (m, 0.5H), 3.85—3.80 (m, 0.5H), 3.79—3.72 (m, 0.5H), 3.32 (s, 3H), 2.72 (d,  $J = 5.4$  Hz, 0.5H), 2.55 (d,  $J = 5.4$  Hz, 0.5H), 2.46 (s, 3H), 1.50 (s, 5H), 1.40 (s, 4H);  $^{13}\text{C}$  NMR (75 MHz,  $\text{CDCl}_3$ )  $\delta$  166.1, 165.7, 153.5, 153.1, 145.0, 144.9, 133.4, 132.8, 129.95, 129.89, 129.84, 129.8, 129.1, 128.4, 128.3, 128.0, 127.96, 96.8, 83.7, 83.1, 75.1, 73.7, 73.5, 71.7, 69.9, 69.3, 68.3, 68.0, 67.1, 55.52, 55.46, 27.7, 27.6, 27.5, 21.6; MS [HR-FAB(+)] :  $m/z$  calcd for  $\text{C}_{26}\text{H}_{33}\text{O}_{11}\text{S}$   $[\text{M}+\text{H}]^+$ : 553.1744, found: 553.1726.

$(\text{PhO})_2(\text{O})\text{PCl}$  (155  $\mu\text{L}$ , 0.75 mmol) was added to the stirred solution of methyl  $O^2$ -benzoyl- $O^3$ - $t$ -butoxycarbonyl- $O^6$ - $p$ -toluenesulfonyl- $\alpha$ -D-glucoside (**4**) (276 mg, 0.5 mmol), pyridine (60  $\mu\text{L}$ , 0.75 mmol) and DMAP (92 mg, 0.75 mmol) in  $\text{CH}_2\text{Cl}_2$  (2.0 mL) and then stirred for 22 h at rt. Water (20 mL) was added to the solution and extracted with EtOAc (20 mL x 3), and then dried over  $\text{MgSO}_4$ . Removal of the solvent afforded an oily residue, which was purified by column chromatography on silica gel (10% EtOAc in hexane) to afford **5** (373 mg, 95%) as a white solid.

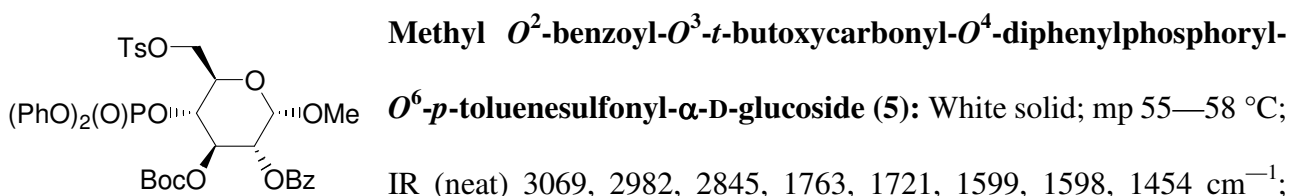

$[\alpha]_{\text{D}}^{20} = +101.3$  ( $c$  1.0,  $\text{CHCl}_3$ );  $^1\text{H}$  NMR (300 MHz,  $\text{CDCl}_3$ )  $\delta$  8.02 (d,  $J = 7.2$  Hz, 0.9H), 7.96 (d,  $J = 7.2$  Hz, 1.1H), 7.83 (d,  $J = 8.4$  Hz, 1.1H), 7.73 (d,  $J = 8.4$  Hz, 0.9H), 7.59—6.78 (m, 15H), 5.62 (t,  $J = 9.6$  Hz, 0.5H), 5.28 (q,  $J = 9.0$  Hz, 0.5H), 5.06 (d,  $J = 3.6$  Hz, 0.5H), 5.02—4.92 (m, 1.5H), 4.86 (dd,  $J = 3.5, 10.1$  Hz, 0.5H), 4.57 (q,  $J = 3.5$  Hz, 0.5H), 4.36—3.99 (m, 3H), 3.35 (s, 1.3H), 3.27 (s, 1.7H), 2.46 (s, 1.7H), 2.41 (s, 1.3H), 1.27 (s, 5H), 1.15 (s, 4H);  $^{13}\text{C}$  NMR (75 MHz,  $\text{CDCl}_3$ )  $\delta$  165.5, 165.4, 157.7, 152.5, 152.0, 150.5, 150.4, 150.3, 149.9, 144.9, 144.8, 133.5, 133.1, 132.7, 130.1, 129.9, 129.8, 129.7, 129.6, 129.51, 129.50, 129.2, 128.8, 128.6, 128.3, 128.1, 127.99, 125.6, 125.5, 125.4, 125.0, 124.8, 120.6, 120.5, 120.45, 120.4, 120.2, 120.1, 119.8, 119.75, 100.5, 96.4, 96.3, 83.5, 82.8, 76.0, 75.9, 74.0, 73.9, 72.6, 72.5, 71.77, 71.74, 71.69, 71.5, 67.9, 67.8, 67.6, 67.1, 55.6, 55.5,

27.5, 27.2, 21.6, 21.5; MS[HR-FAB(+)]: $m/z$  calcd for  $C_{38}H_{42}O_{14}PS$   $[M+H]^+$ : 785.2033, found: 785.2021.

TsCl (105 mg, 0.55 mmol) was added to the stirred solution of methyl  $\beta$ -D-xyloside (**1f**) (82 mg, 0.5 mmol),  $Me_2SnCl_2$  (5.5 mg, 0.025 mmol) and DIPEA (174  $\mu$ L, 1.0 mmol) in THF containing 1%  $H_2O$  (2.0 mL) and then stirred for 20 h at 50  $^{\circ}C$ . 3% aqueous HCl (20 mL) was added to the solution and extracted with EtOAc (20 mL x 3), and then dried over  $MgSO_4$ . Removal of the solvent afforded an oily residue, which was purified by column chromatography on silica gel (50% EtOAc in hexane) to give **2f'** (129 mg, 81%) as a white solid.

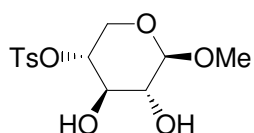

**Methyl  $O^4$ -*p*-toluenesulfonyl- $\beta$ -D-xyloside (**2f'**)**<sup>S2</sup>:  $^1H$  NMR (300 MHz,  $CDCl_3$ )  $\delta$  7.88 (d,  $J$  = 8.4 Hz, 2H), 7.36 (d,  $J$  = 7.8 Hz, 2H), 4.40—4.30 (m, 1H), 4.22 (d,  $J$  = 6.6 Hz, 1H), 4.00 (dd,  $J$  = 4.8, 6.0 Hz, 1H), 3.70—3.60 (m, 1H), 3.49 (s, 3H), 3.39—3.30 (m, 2H), 3.25 (s, 1H), 3.08 (s, 1H), 2.45 (s, 3H).

BzCl (76  $\mu$ L, 0.65 mmol) was added to the stirred solution of methyl  $O^4$ -*p*-toluenesulfonyl- $\beta$ -D-xyloside (**2f'**) (159 mg, 0.5 mmol),  $Me_2SnCl_2$  (5.5 mg, 0.025 mmol) and DIPEA (174  $\mu$ L, 1.0 mmol) in THF (2.0 mL) and then stirred for 24 h at rt. 3% aqueous HCl (20 mL) was added to the solution and extracted with EtOAc (20 mL x 3), and then dried over  $MgSO_4$ . Removal of the solvent afforded an oily residue, which was purified by column chromatography on silica gel (25% EtOAc in hexane) to afford **6** (129 mg, 87%) as a white solid.

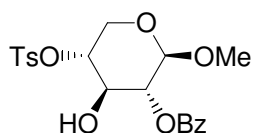

**Methyl  $O^2$ -benzoyl- $O^4$ -*p*-toluenesulfonyl- $\beta$ -D-xyloside (**6**)**: White solid; mp = 144—146  $^{\circ}C$ ; IR (neat) 3500, 1725, 1599, 1453, 1364, 1271  $cm^{-1}$ ;  $[\alpha]_D^{20}$  = —8.8 ( $c$  1.0,  $CHCl_3$ );  $^1H$  NMR (400 MHz,  $CDCl_3$ )  $\delta$  8.04 (d,  $J$  = 7.3 Hz, 2H), 7.76 (d,  $J$  = 7.8 Hz, 2H), 7.57 (t,  $J$  = 7.8 Hz, 1H), 7.44—7.39 (m, 2H), 7.28 (d,  $J$  = 8.3 Hz, 2H), 4.98 (t,  $J$  = 4.4 Hz, 1H), 4.66 (s, 1H), 4.47 (s, 1H), 4.16 (d,  $J$  = 12.7 Hz, 1H), 3.92 (s, 1H), 3.65 (dd,  $J$  = 5.5, 15.9 Hz, 1H), 3.45 (s, 3H), 3.30—3.20 (m, 1H), 2.41 (s, 3H);  $^{13}C$  NMR (75 MHz,  $CDCl_3$ )  $\delta$  165.5, 145.2, 133.3,

129.9, 129.2, 128.4, 127.9, 99.7, 70.0, 68.6, 59.6, 56.3, 21.6; [HR-EI(+)]:  $m/z$  calcd for  $C_{20}H_{22}O_8S$   $[M]^+$  422.1035 : found 422.1057.

Boc<sub>2</sub>O (66 mg, 0.33 mmol) was added to the stirred solution of methyl *O*<sup>2</sup>-benzoyl-*O*<sup>4</sup>-*p*-toluenesulfonyl-β-D-xyloside (**6**) (126 mg, 0.3 mmol), Me<sub>2</sub>SnCl<sub>2</sub> (3.0 mg, 0.0075 mmol), DMAP (37 mg, 0.33 mmol) and DIPEA (95 μL, 0.6 mmol) in THF (1.5 mL) and then stirred for 40 min at rt. 3% aqueous HCl (20 mL) was added to the solution and extracted with EtOAc (20 mL x 3), and then dried over MgSO<sub>4</sub>. Removal of the solvent afforded an oily residue, which was purified by column chromatography on silica gel (15% EtOAc in hexane) to afford **7** (130 mg, 83%) as an amorphous.

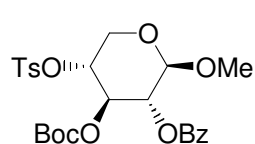

**Methyl *O*<sup>2</sup>-benzoyl-*O*<sup>3</sup>-*t*-butoxycarbonyl-*O*<sup>4</sup>-*p*-toluenesulfonyl-β-D-xyloside (**7**):** Amorphous; IR (neat) 2982, 1750, 1599, 1453, 1370, 1281, 1256

cm<sup>-1</sup>;  $[\alpha]_D^{21} = +29.6$  ( $c$  1.0, CHCl<sub>3</sub>); <sup>1</sup>H NMR (300 MHz, CDCl<sub>3</sub>) δ 8.00 (d,  $J$  = 6.9 Hz, 2H), 7.78 (d,  $J$  = 8.4 Hz, 2H), 7.55 (t,  $J$  = 7.5 Hz, 1H), 7.40 (t,  $J$  = 7.5 Hz, 2H), 7.33 (d,  $J$  = 7.8 Hz, 2H), 5.08—5.06 (m, 2H), 4.57—4.48 (m, 2H), 4.28 (dd,  $J$  = 4.8, 6.1 Hz, 1H), 3.58 (dd,  $J$  = 6.0, 8.7 Hz, 1H), 3.45 (s, 3H), 2.44 (s, 3H), 1.24 (s, 9H); <sup>13</sup>C NMR (75 MHz, CDCl<sub>3</sub>) δ 164.8, 152.0, 145.1, 133.2, 132.7, 129.9, 129.8, 129.1, 128.2, 127.9, 101.5, 82.8, 74.5, 73.2, 71.0, 62.5, 56.7, 27.3, 21.6; [HR-FAB(+)]:  $m/z$  calcd for  $C_{25}H_{31}O_{10}S$   $[M+H]^+$  523.1638 : found 523.1627.

### Chemical Transformation of α-Methyl Glucoside Derivative **5**

Methyl *O*<sup>2</sup>-benzoyl-*O*<sup>3</sup>-*t*-butoxycarbonyl-*O*<sup>4</sup>-diphenylphosphoryl-*O*<sup>6</sup>-*p*-toluenesulfonyl-α-D-glucoside (**5**) (78 mg, 0.1 mmol) was added to the stirred solution of NaN<sub>3</sub> (10 mg, 0.15 mmol) and 15-crown-5 (2 mg, 0.01 mmol) in DMF (1.0 mL) and then stirred for 20 h at 50 °C. Water (15 mL) was added to the solution and extracted with Et<sub>2</sub>O (15 mL x 3), and then dried over MgSO<sub>4</sub>. Removal of the solvent afforded an oily residue, which was purified by column chromatography on silica gel (10% EtOAc in hexane) to afford **8** (62 mg, 95%) as colorless oil.

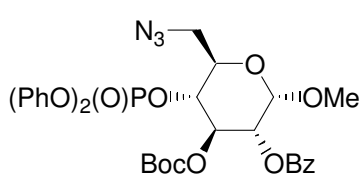

**Methyl *O*<sup>2</sup>-benzoyl-*O*<sup>3</sup>-*t*-butoxycarbonyl-*O*<sup>4</sup>-diphenylphosphoryl-**

**6-deoxy-6-azido-α-D-glucoside (8):** Colorless oil; IR (neat) 2928,

2105, 1754, 1728, 1591, 1491, 1455, 1372 cm<sup>-1</sup>; [α]<sub>D</sub><sup>18</sup> = +116.8 (*c*

1.0, CHCl<sub>3</sub>); <sup>1</sup>H NMR (400 MHz, CDCl<sub>3</sub>) δ 8.05 (d, *J* = 8.3 Hz, 0.9H), 7.99 (d, *J* = 8.3 Hz, 1.1H), 7.60—7.10 (m, 13H), 5.65 (t, *J* = 9.8 Hz, 0.5H), 5.33 (q, *J* = 9.2 Hz, 0.5H), 5.20—4.70 (m, 2.5H), 4.67 (q, *J* = 9.2 Hz, 0.5H), 4.01—3.97 (m, 1H), 3.42 (s, 1.4H), 3.38 (s, 1.6H), 3.49—3.38 (m, 1H), 3.28—3.26 (m, 1H), 1.28 (s, 5H), 1.17 (s, 4H); <sup>13</sup>C NMR (75 MHz, CDCl<sub>3</sub>) δ 165.6, 152.3, 133.5, 133.2, 130.2, 129.8, 129.6, 129.3, 128.7, 128.3, 128.2, 125.8, 125.6, 125.4, 125.0, 120.7, 120.6, 120.4, 119.9, 119.8, 96.6, 83.5, 82.8, 76.0, 74.9, 72.7, 72.0, 69.2, 69.1, 68.6, 55.7, 51.0, 50.4, 27.3, 27.2; [HR-FAB(+)]: *m/z* calcd for C<sub>31</sub>H<sub>35</sub>N<sub>3</sub>O<sub>11</sub>P [M+H]<sup>+</sup> 655.1931 : found 655.1950.

Methyl *O*<sup>2</sup>-benzoyl-*O*<sup>3</sup>-*t*-butoxycarbonyl-*O*<sup>4</sup>-diphenylphosphoryl-6-deoxy-6-azido-α-D-glucoside (8) (328 mg, 0.5 mmol) was added to the stirred solution of Ph<sub>3</sub>P (262 mg, 1.0 mmol) and H<sub>2</sub>O (18 μl, 1.0 mmol) in THF (4.0 mL) at rt. After being stirred for 6 h, the mixture was evaporated, which was purified by column chromatography on silica gel (80% EtOAc in hexane) to afford **9** (220 mg, 70%) as colorless oil.

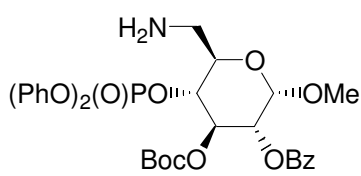

**Methyl *O*<sup>2</sup>-benzoyl-*O*<sup>3</sup>-*t*-butoxycarbonyl-*O*<sup>4</sup>-diphenylphosphoryl-**

**6-deoxy-6-amino-α-D-glucoside (9):** Colorless oil; IR (neat) 3200,

2980, 1752, 1748, 1593, 1491, 1281 cm<sup>-1</sup>; [α]<sub>D</sub><sup>28</sup> = +21.7 (*c* 1.5,

CHCl<sub>3</sub>); <sup>1</sup>H NMR (300 MHz, CDCl<sub>3</sub>) δ 8.02 (dd, *J* = 7.2, 23.7 Hz, 2H), 7.58—7.10 (m, 10H), 6.91 (d, *J* = 4.2 Hz, 2H), 6.81 (d, *J* = 7.2 Hz, 1H), 5.67 (t, *J* = 8.7 Hz, 0.5H), 5.35 (q, *J* = 8.7, 17.4 Hz, 0.5H), 5.15 (d, *J* = 4.2 Hz, 0.5H), 5.10—4.90 (m, 2.5H), 4.73 (q, *J* = 8.7, 17.4 Hz, 0.5H), 3.85 (bs, 2H), 3.37 (s, 1.5H), 3.32 (s, 2H), 3.02—2.70 (m, 2H), 1.46 (s, 1H), 1.41 (s, 1H), 1.27 (s, 4H), 1.17 (s, 3H); <sup>13</sup>C NMR (100 MHz, CDCl<sub>3</sub>) δ 165.5, 152.7, 130.2, 130.0, 129.9, 129.7, 129.6, 129.4, 129.2, 129.0, 128.3, 128.2, 125.7, 125.0, 120.6, 120.5, 120.3, 119.9, 119.8, 115.5, 96.7, 83.6, 82.6, 72.6,

72.0, 55.8, 55.7, 28.4, 27.3, 27.2; [HR-FAB(+)]:  $m/z$  calcd for  $C_{31}H_{37}NO_{11}P$   $[M+H]^+$  630.2104 : found 630.2097.

Methyl  $O^2$ -benzoyl- $O^3$ -*t*-butoxycarbonyl- $O^4$ -diphenylphosphoryl-6-deoxy-6-azido- $\alpha$ -D-glucoside (**8**) (328 mg, 0.5 mmol) was added to the stirred solution of phenyl acetylene (0.11 mL, 1.0 mmol),  $CuSO_4$  (40 mg, 0.25 mmol) and (+)-sodium L-ascorbate (50 mg, 0.25 mmol) in *t*-BuOH/ $H_2O$  = 2/1 (1.8 mL) and then stirred for 24 h at rt. Water (15 mL) was added to the solution and extracted with EtOAc (15 mL x 3), and then dried over  $MgSO_4$ . Removal of the solvent afforded an oily residue, which was purified by column chromatography on silica gel (25% EtOAc in hexane) to leave **10** (283 mg, 75%) as a white solid.

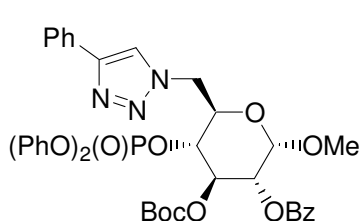

**Methyl  $O^2$ -benzoyl- $O^3$ -*t*-butoxycarbonyl- $O^4$ -diphenylphosphoryl-6-deoxy-6-(4-phenyl-1*H*-1,2,3-triazol-1-yl)- $\alpha$ -D-glucoside (**10**):**

White solid; mp = 61—63 °C; IR (neat) 2988, 1752, 1727, 1591, 1489, 1281  $cm^{-1}$ ;  $[\alpha]_D^{27} = +57.7$  ( $c$  1.0,  $CHCl_3$ );  $^1H$  NMR (300 MHz,  $CDCl_3$ )  $\delta$  8.02 (d,  $J$  = 9.0 Hz, 0.5H), 7.96 (d,  $J$  = 9.0 Hz, 2H), 7.84 (t,  $J$  = 9.9 Hz, 2H), 7.60—7.12 (m, 14H), 6.91 (d,  $J$  = 4.5 Hz, 2H), 6.89—6.82 (m, 0.5H), 5.69 (t,  $J$  = 9.9 Hz, 0.5H), 5.51—5.40 (m, 0.5H), 5.12—5.10 (m, 1.5H), 4.98 (t,  $J$  = 9.6 Hz, 1H), 4.76 (dd,  $J$  = 4.5, 9.9 Hz, 0.5H), 4.67—4.63 (m, 0.5H), 4.54—4.48 (m, 0.5H), 4.38—4.20 (m, 2H), 3.06 (d,  $J$  = 8.1 Hz, 3H), 1.33 (s, 5.5H), 1.17 (s, 3.5H);  $^{13}C$  NMR (100 MHz,  $CDCl_3$ )  $\delta$  165.6, 152.5, 133.5, 133.2, 130.4, 130.2, 130.1, 130.0, 129.6, 129.3, 128.8, 128.5, 128.3, 128.2, 128.1, 126.0, 125.7, 125.5, 125.0, 120.7, 120.6, 120.5, 120.4, 119.9, 119.8, 96.5, 83.9, 82.3, 75.9, 75.5, 73.0, 72.5, 71.9, 68.4, 67.9, 55.5, 50.7, 50.3, 27.3, 27.2; [HR-FAB(+)]:  $m/z$  calcd for  $C_{39}H_{41}N_3O_{11}P$   $[M+H]^+$  758.2479 : found 758.2446.

## References

- S1) Ho, W. M. ; Wong, H. N. C.; *Tetrahedron* **1995**, *51*, 7373—7388.  
 S2) Tsuda, Y.; Haque, Md. E. ; Yoshimoto, K. *Chem. Pharm. Bull.* **1983**, *31*, 1612—1624.

- S3) Peri, F.; Cipolla, L.; Nicotra, F. *Tetrahedron Lett.* **2000**, *41*, 8587—8590.
- S4) Tsuda, Y.; Nishimura, M.; Kobayashi, T.; Sato, Y.; Kanemitsu, K. *Chem. Pharm. Bull.* **1991**, *39*, 2883—2887.

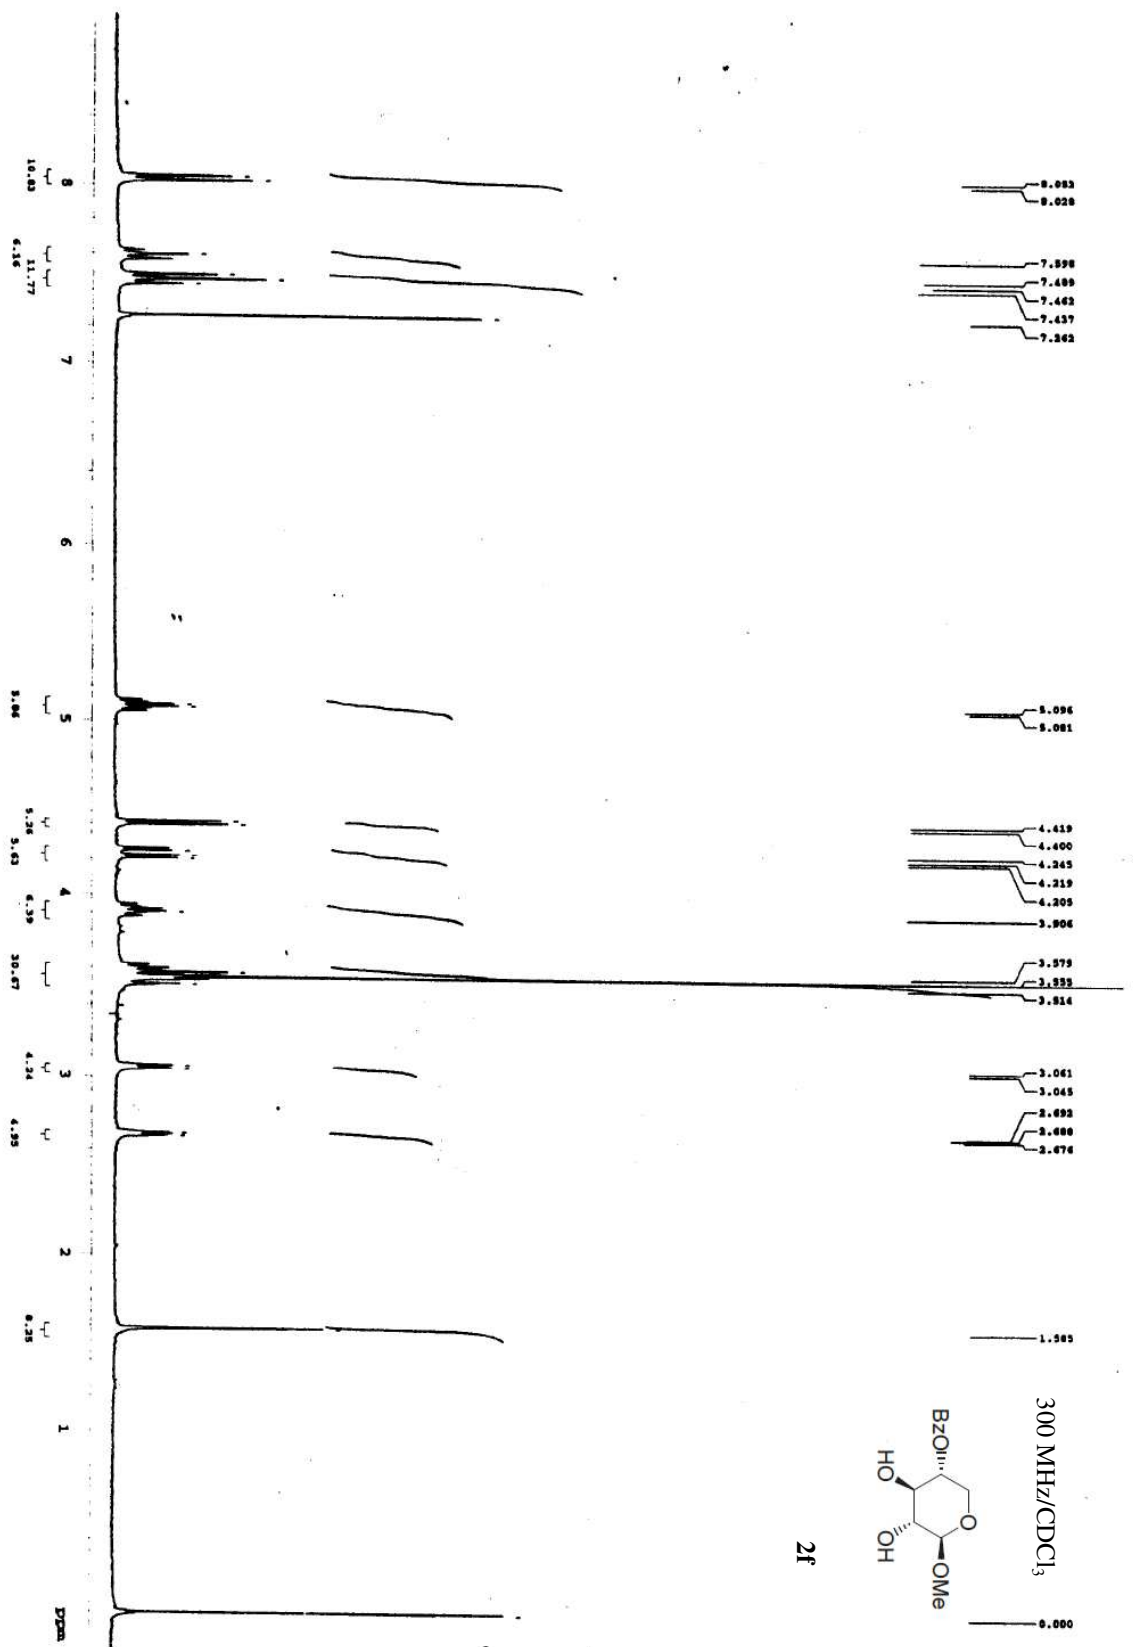

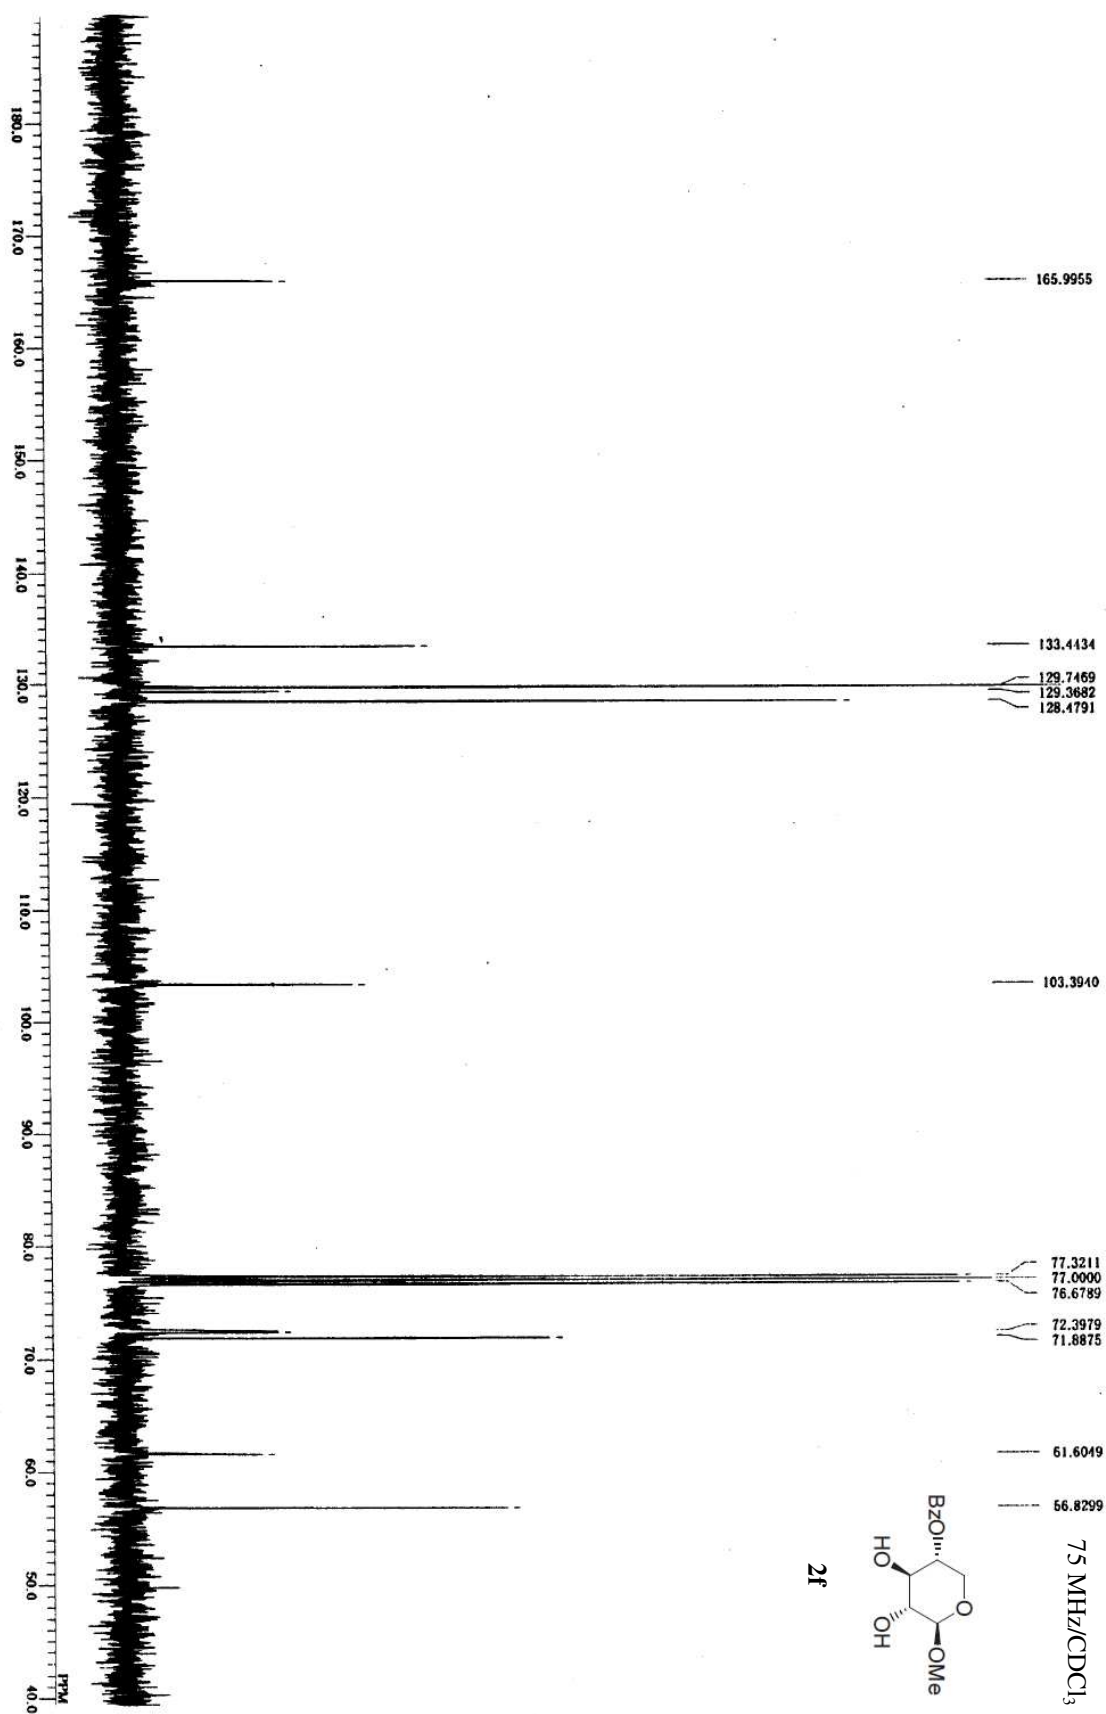

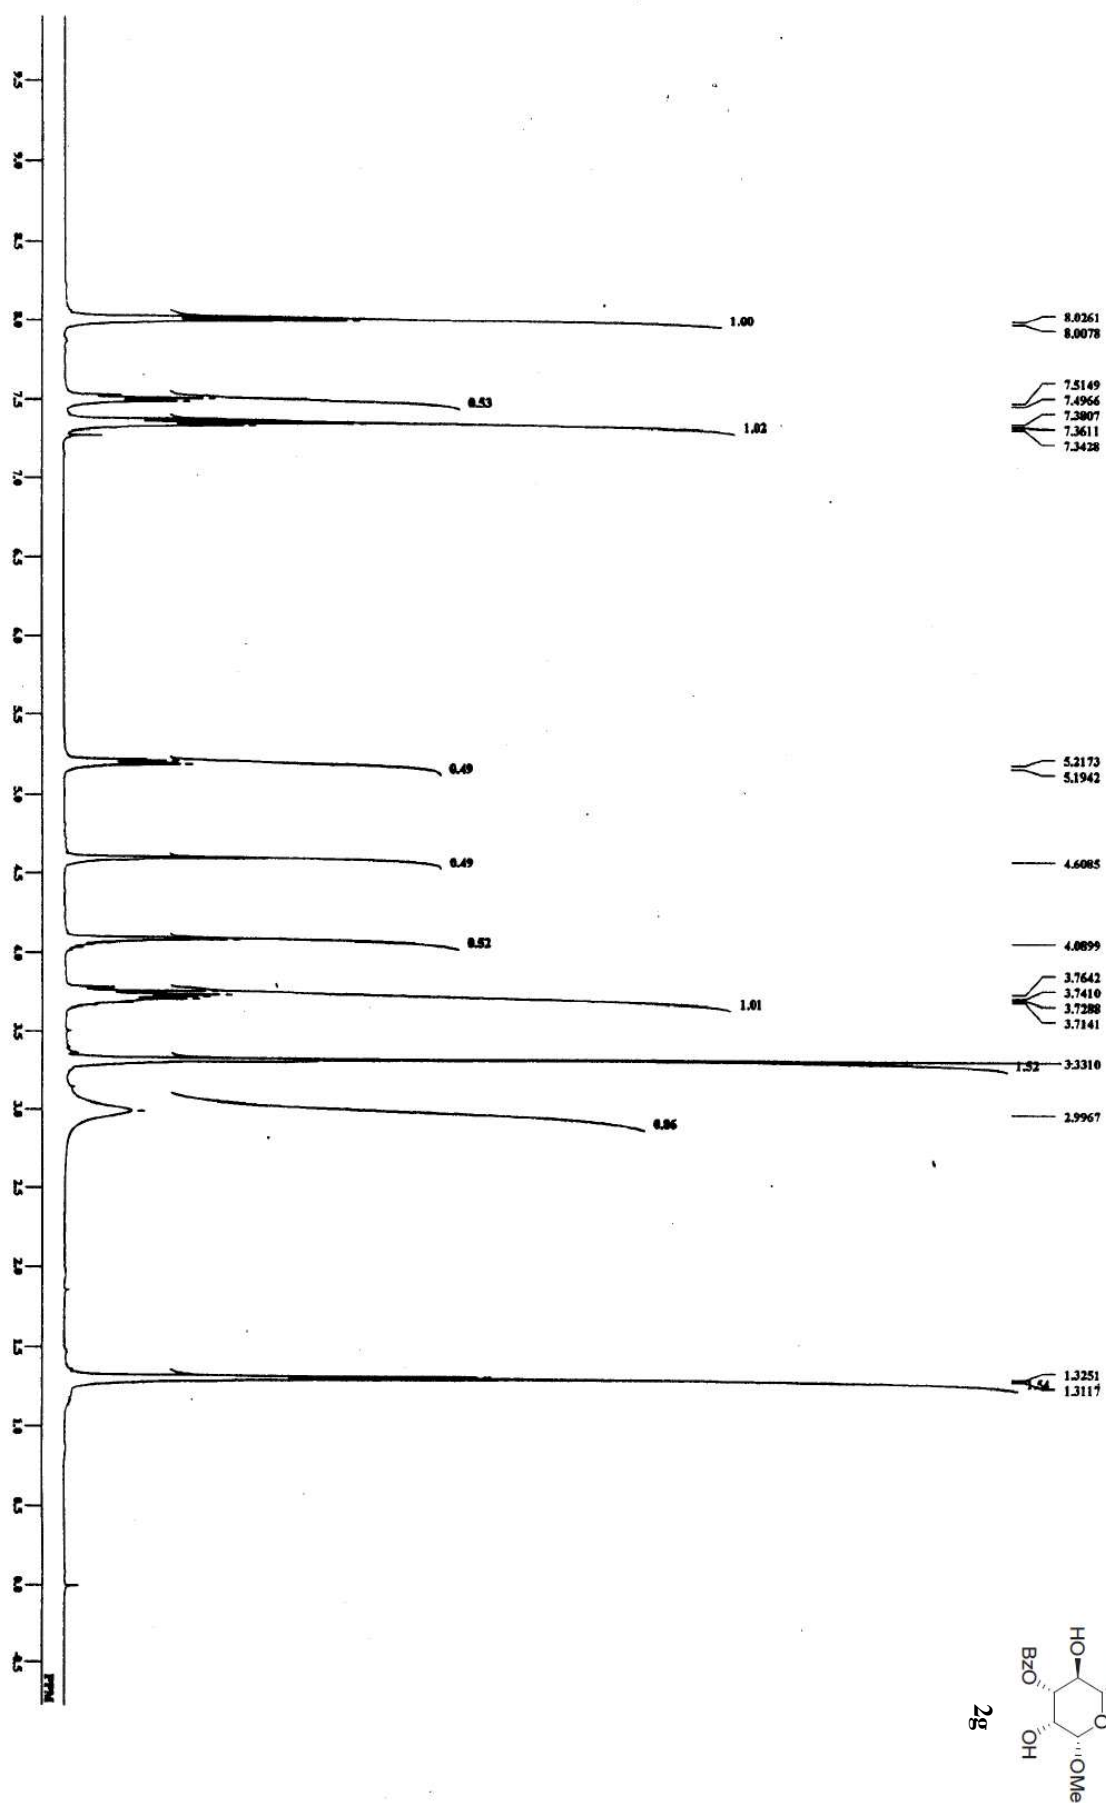

75 MHz/CDCl<sub>3</sub>

2g

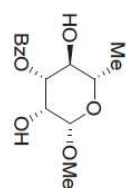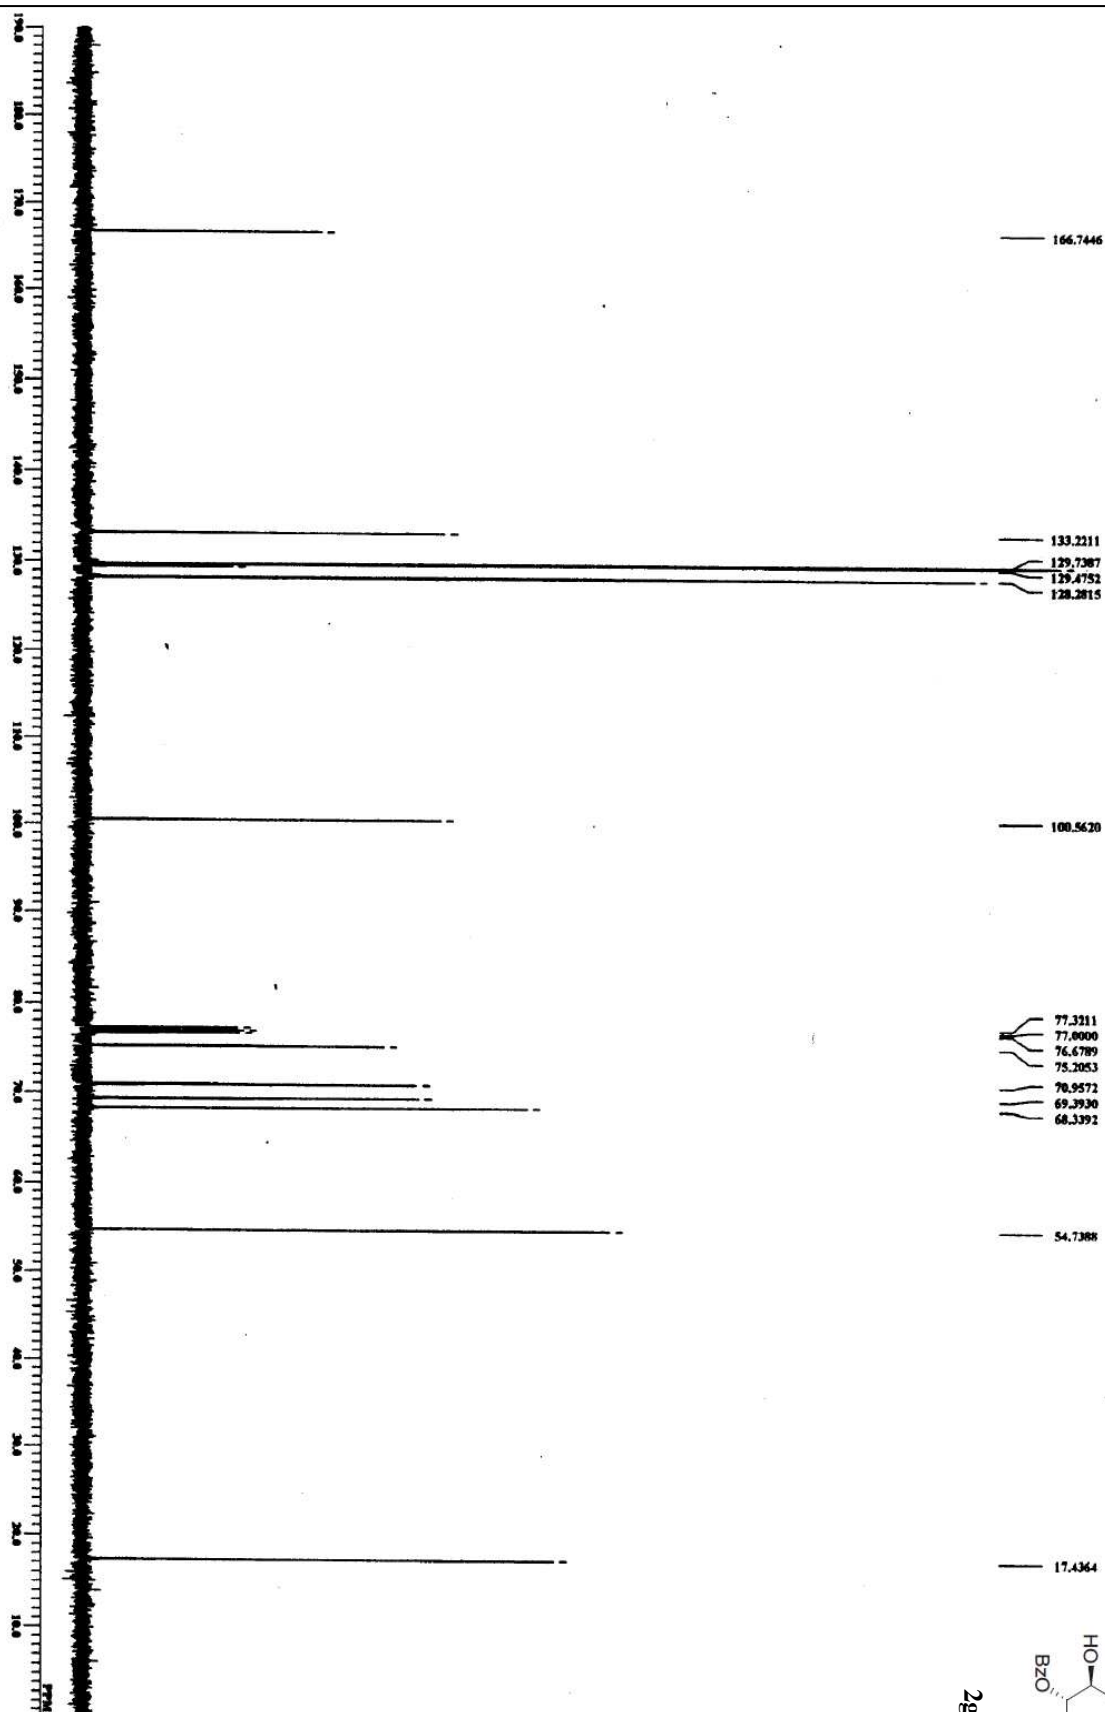

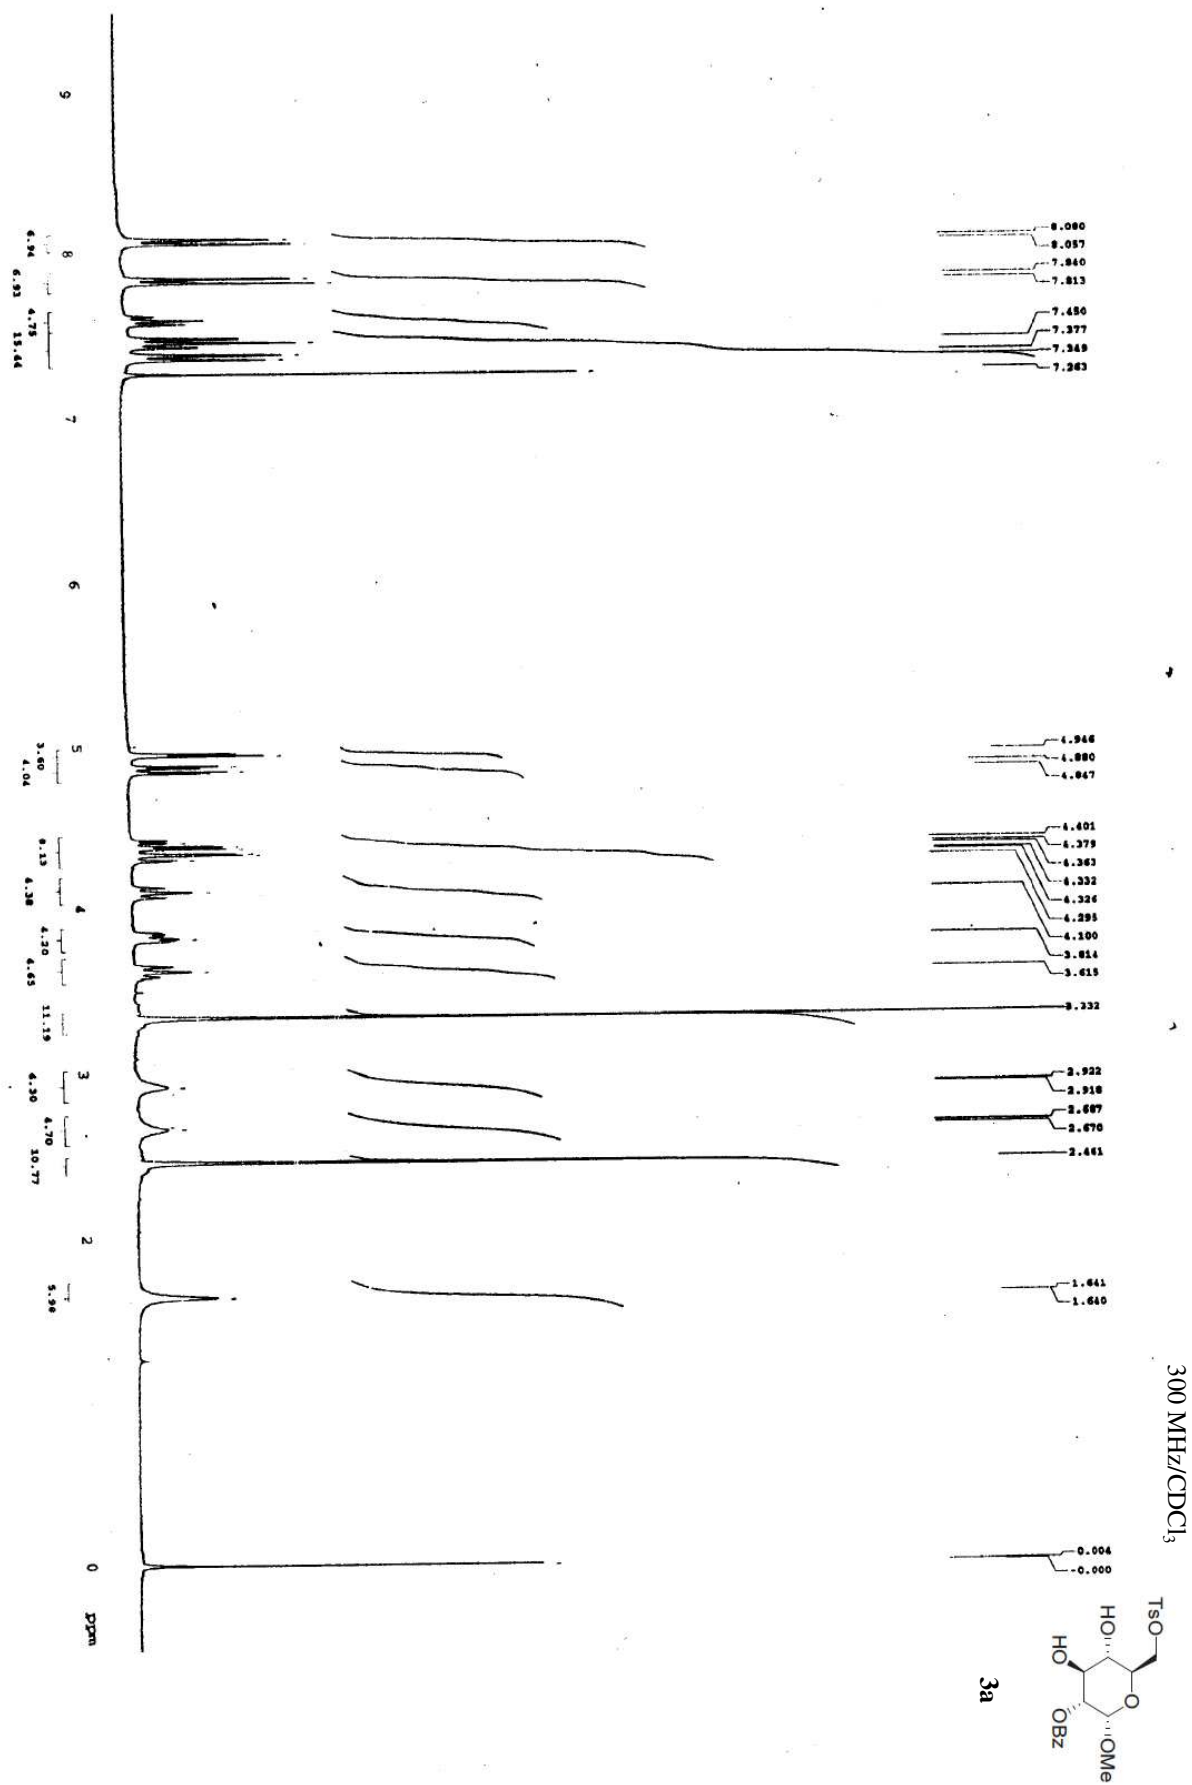

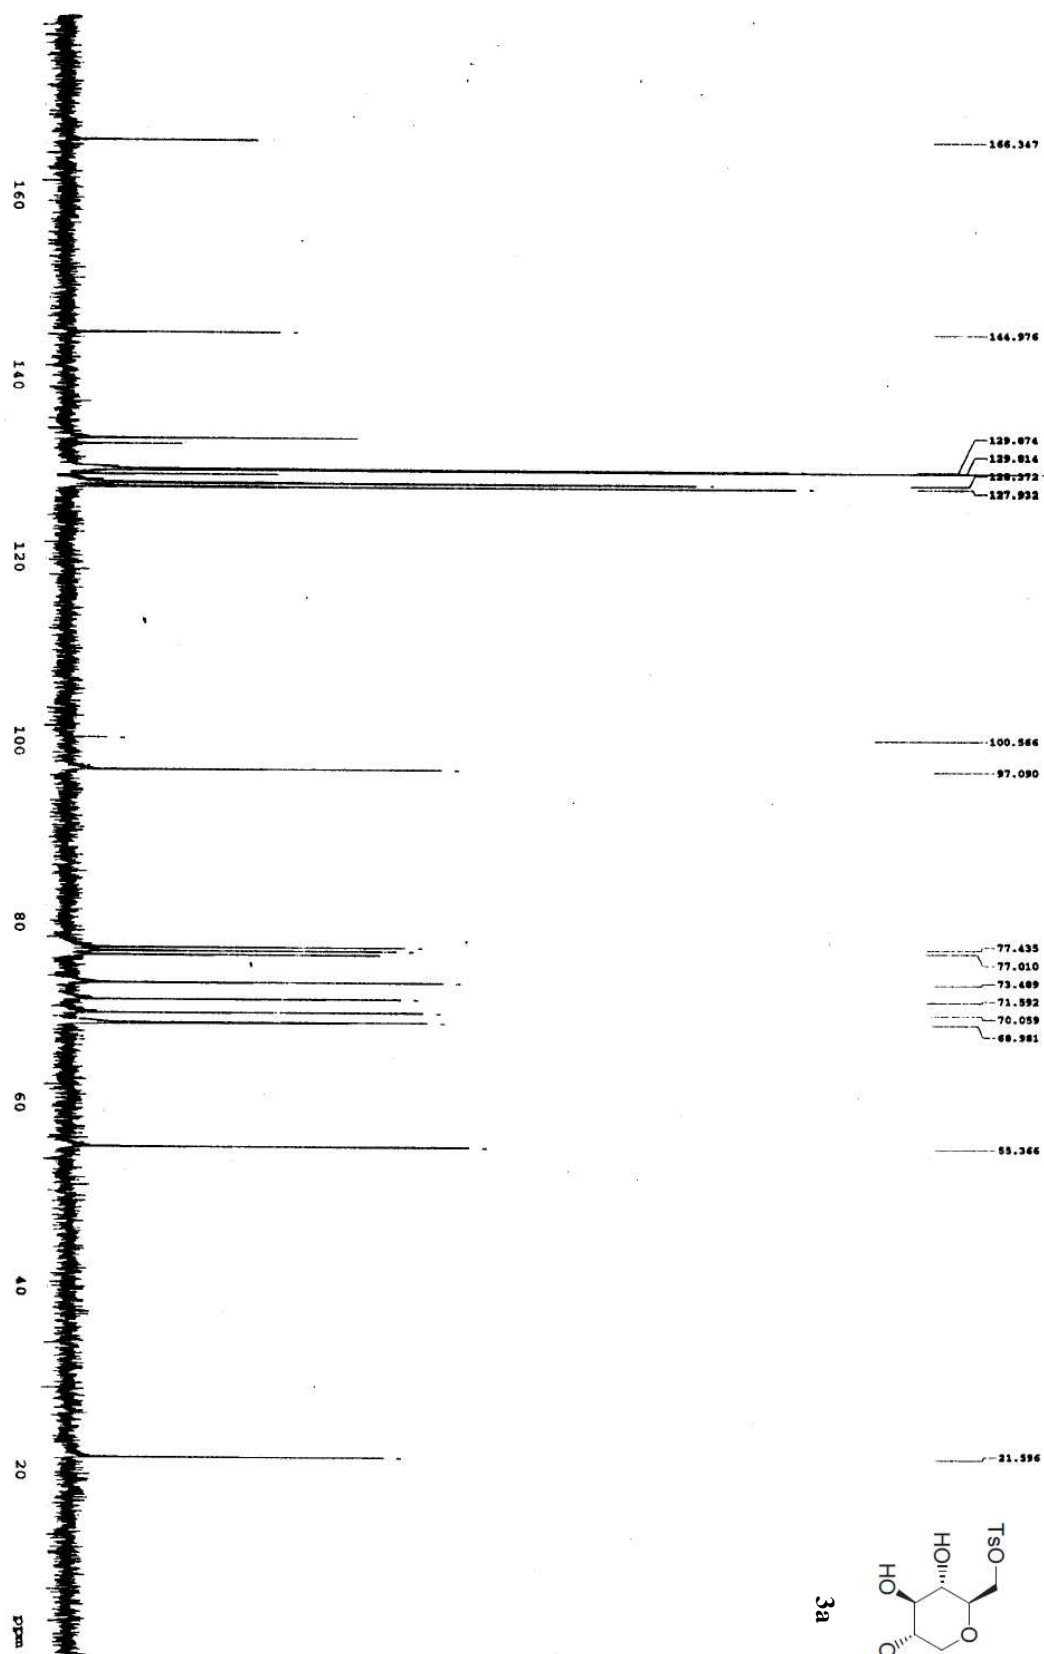

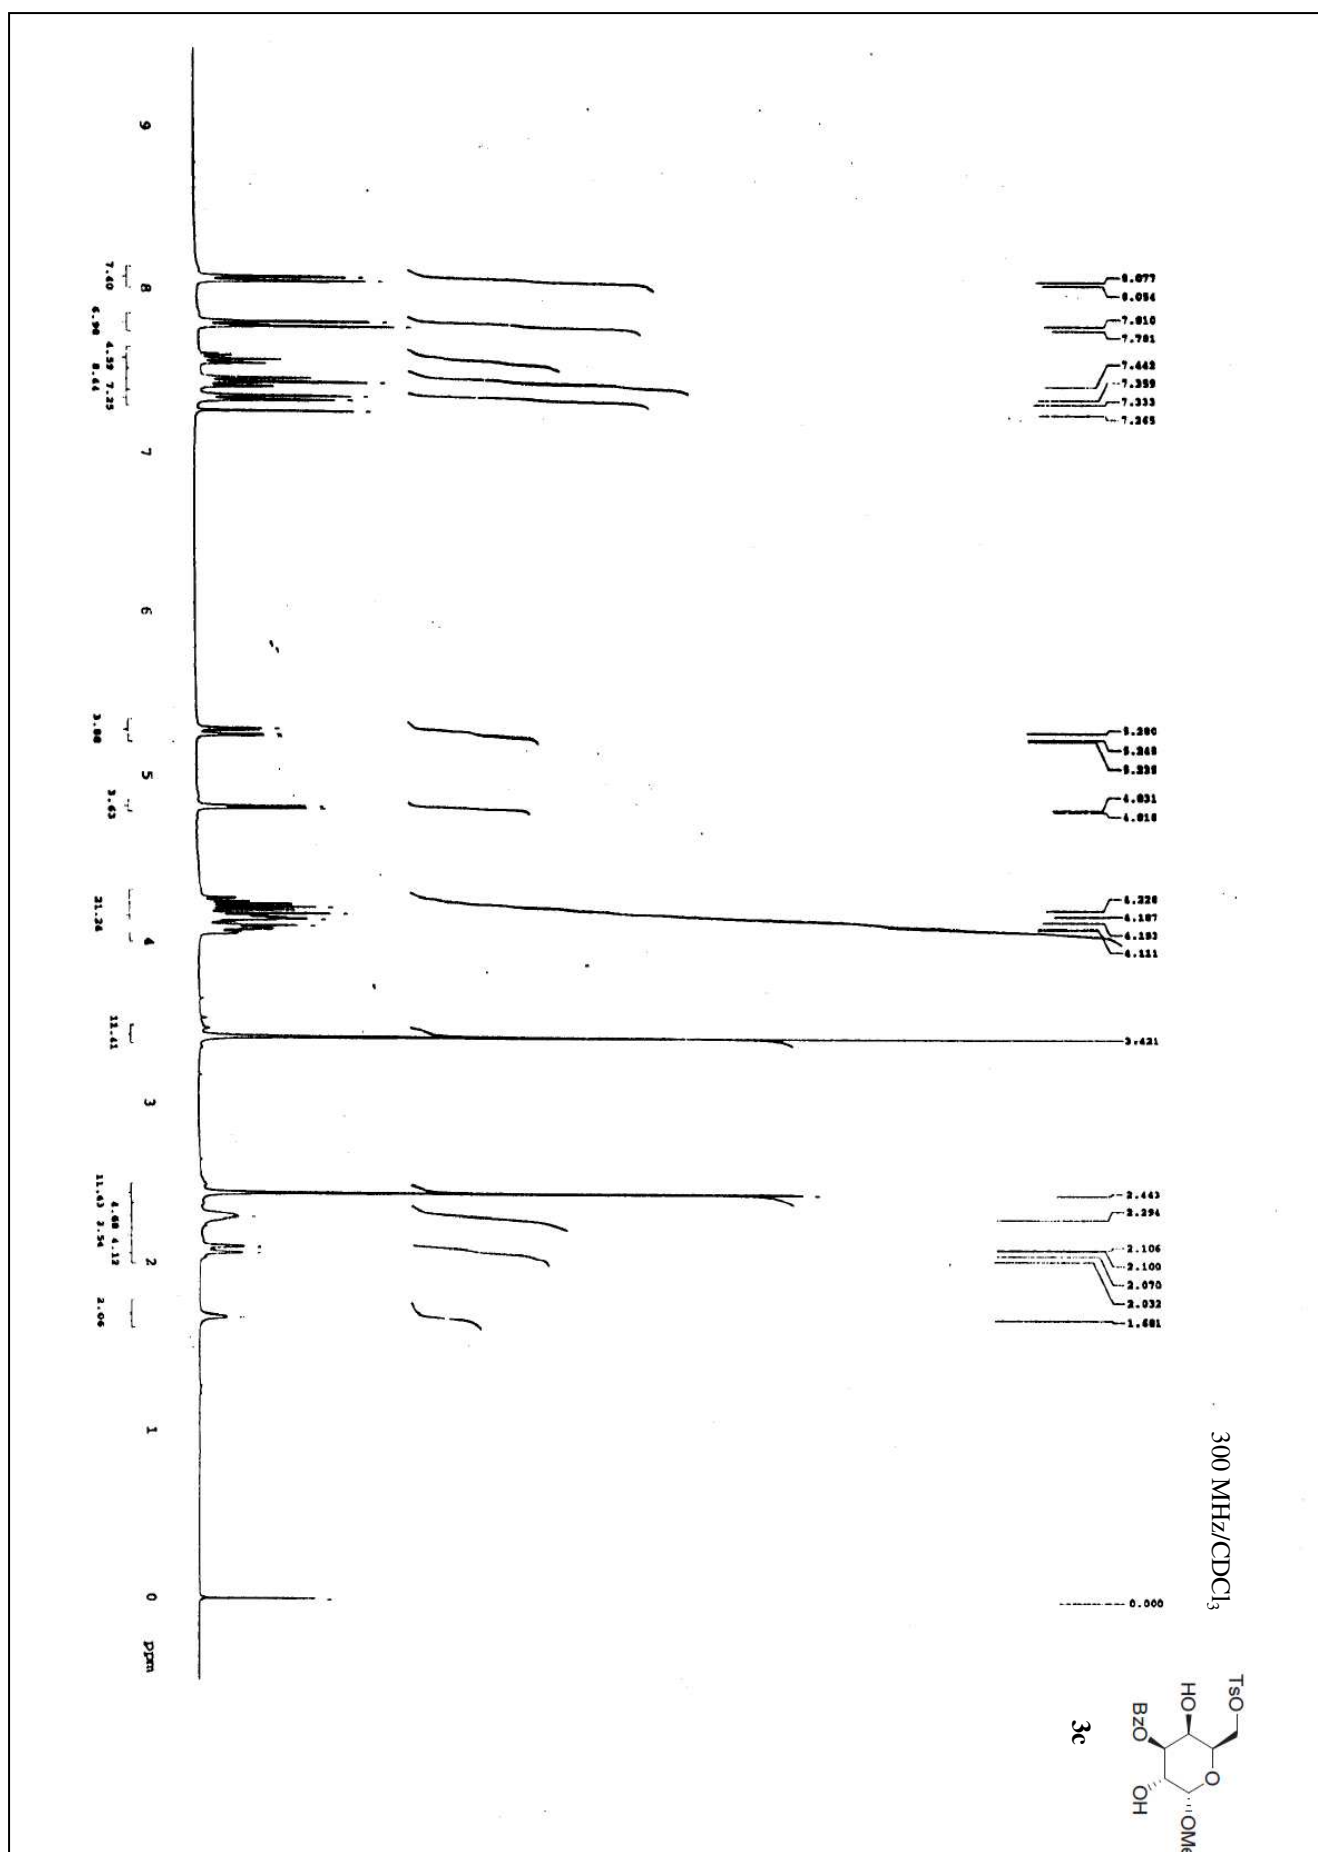

75 MHz/CDCl<sub>3</sub>

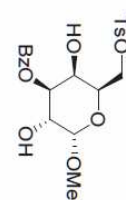

3c

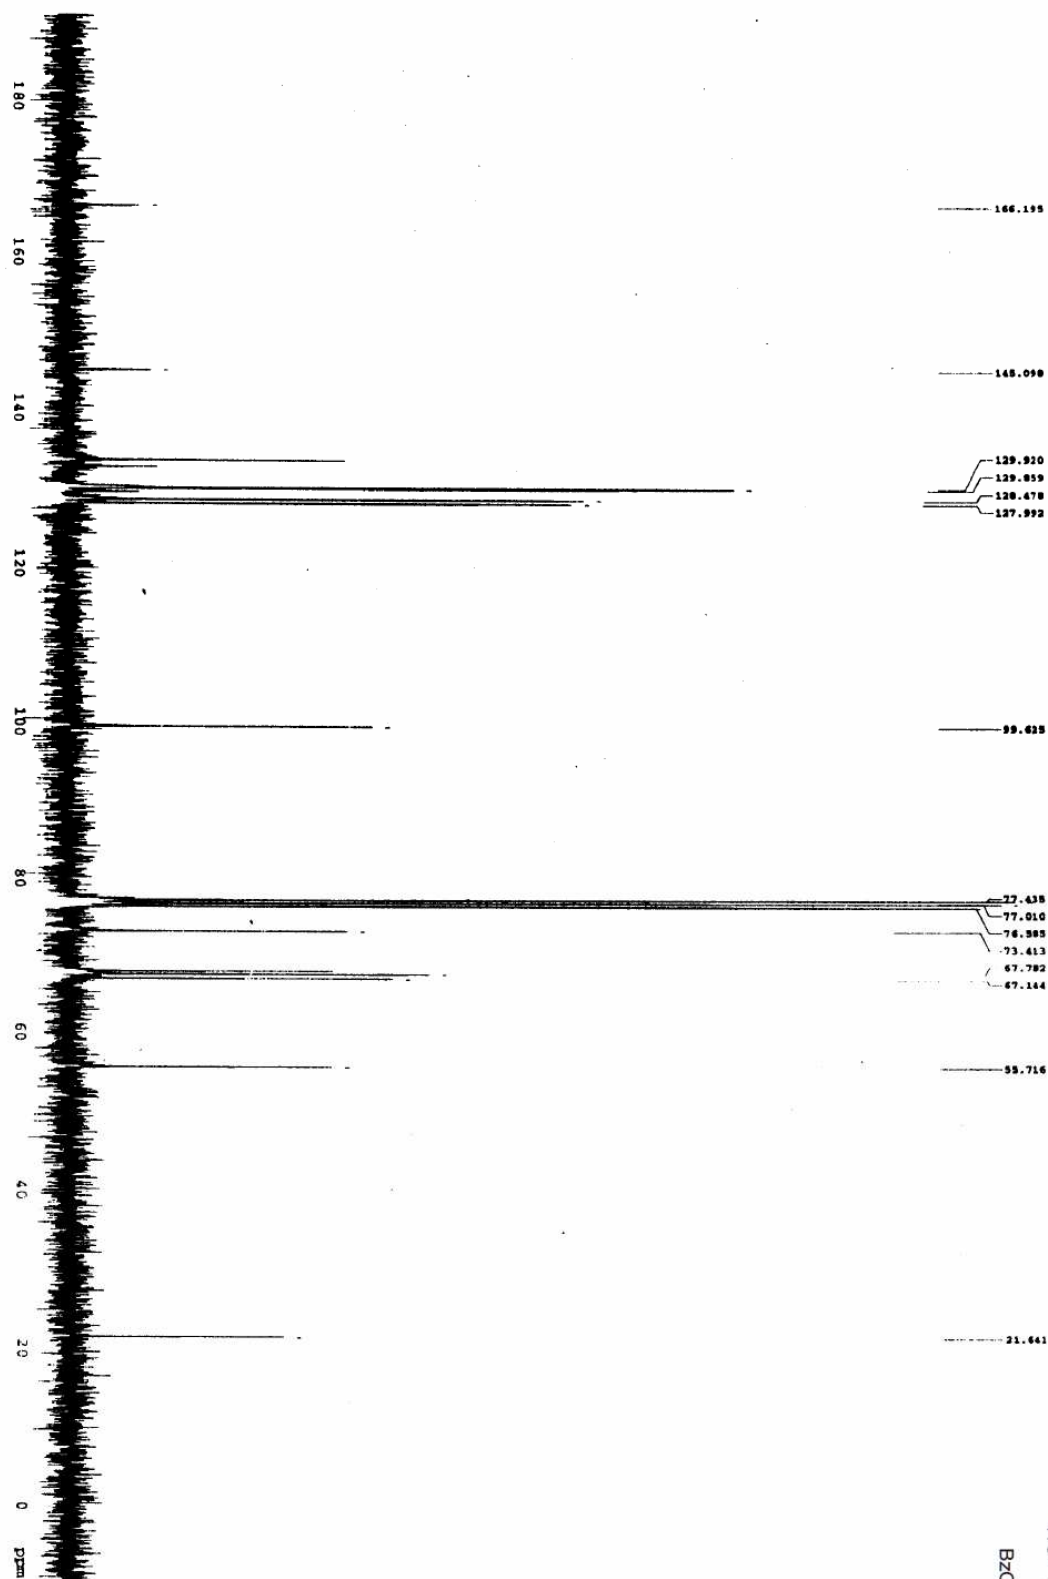

300 MHz/CDCl<sub>3</sub>

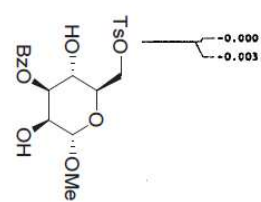

3e

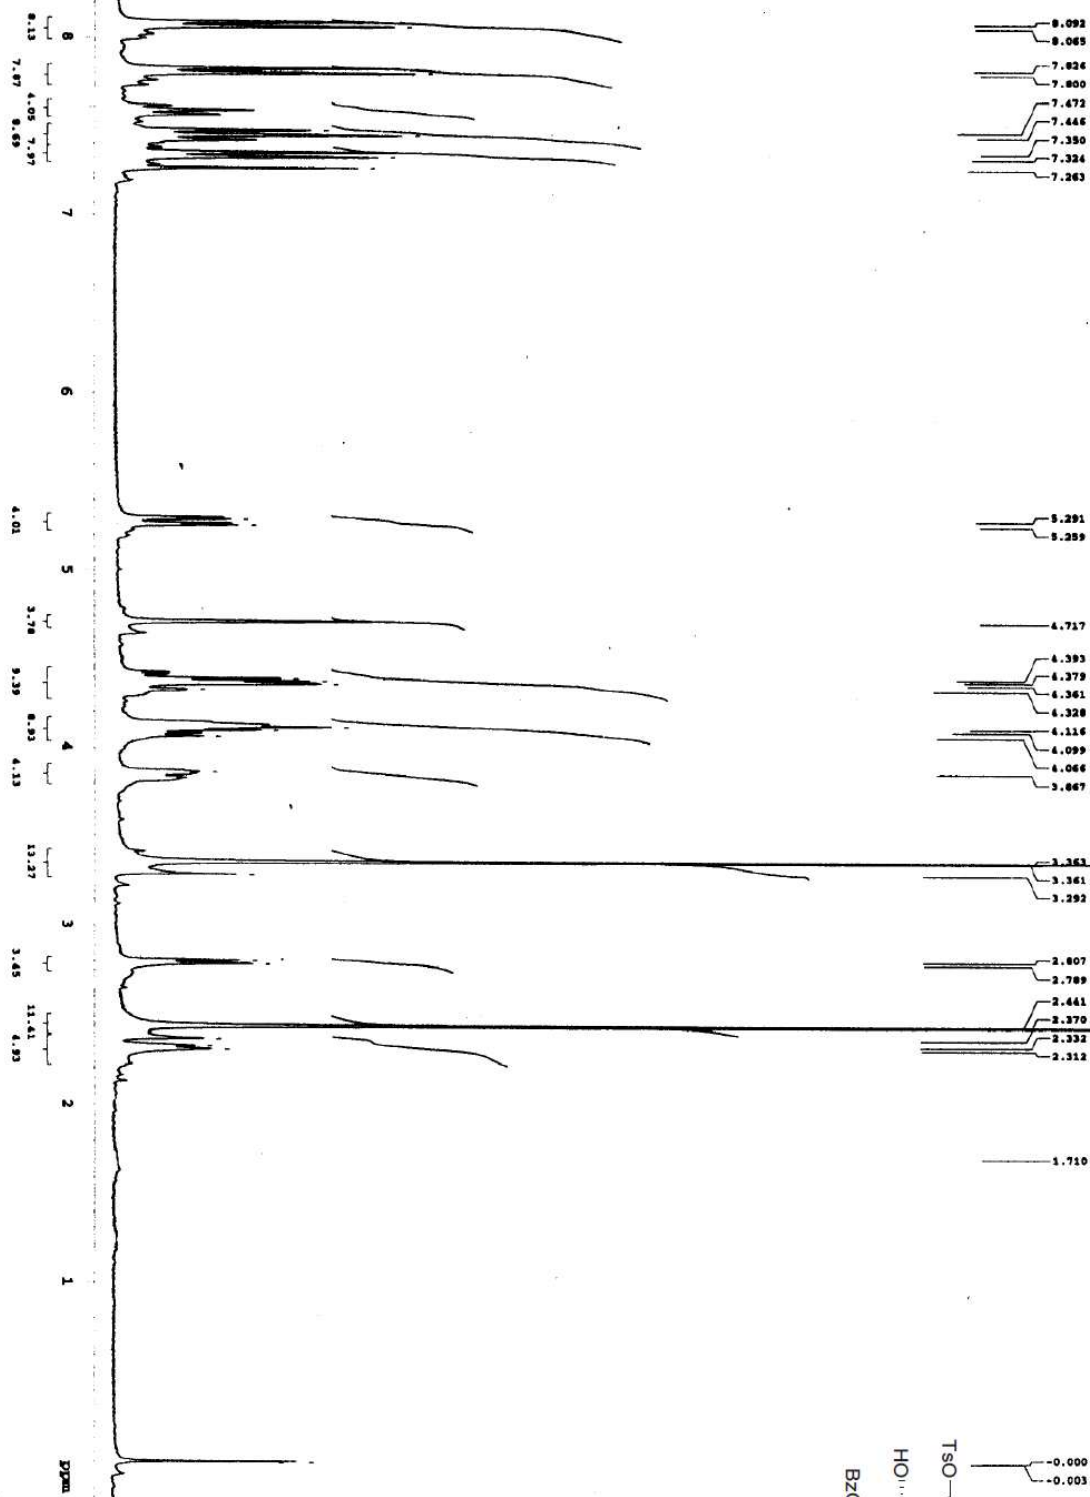

75 MHz/CDCl<sub>3</sub>

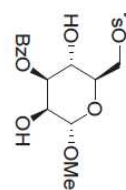

3e

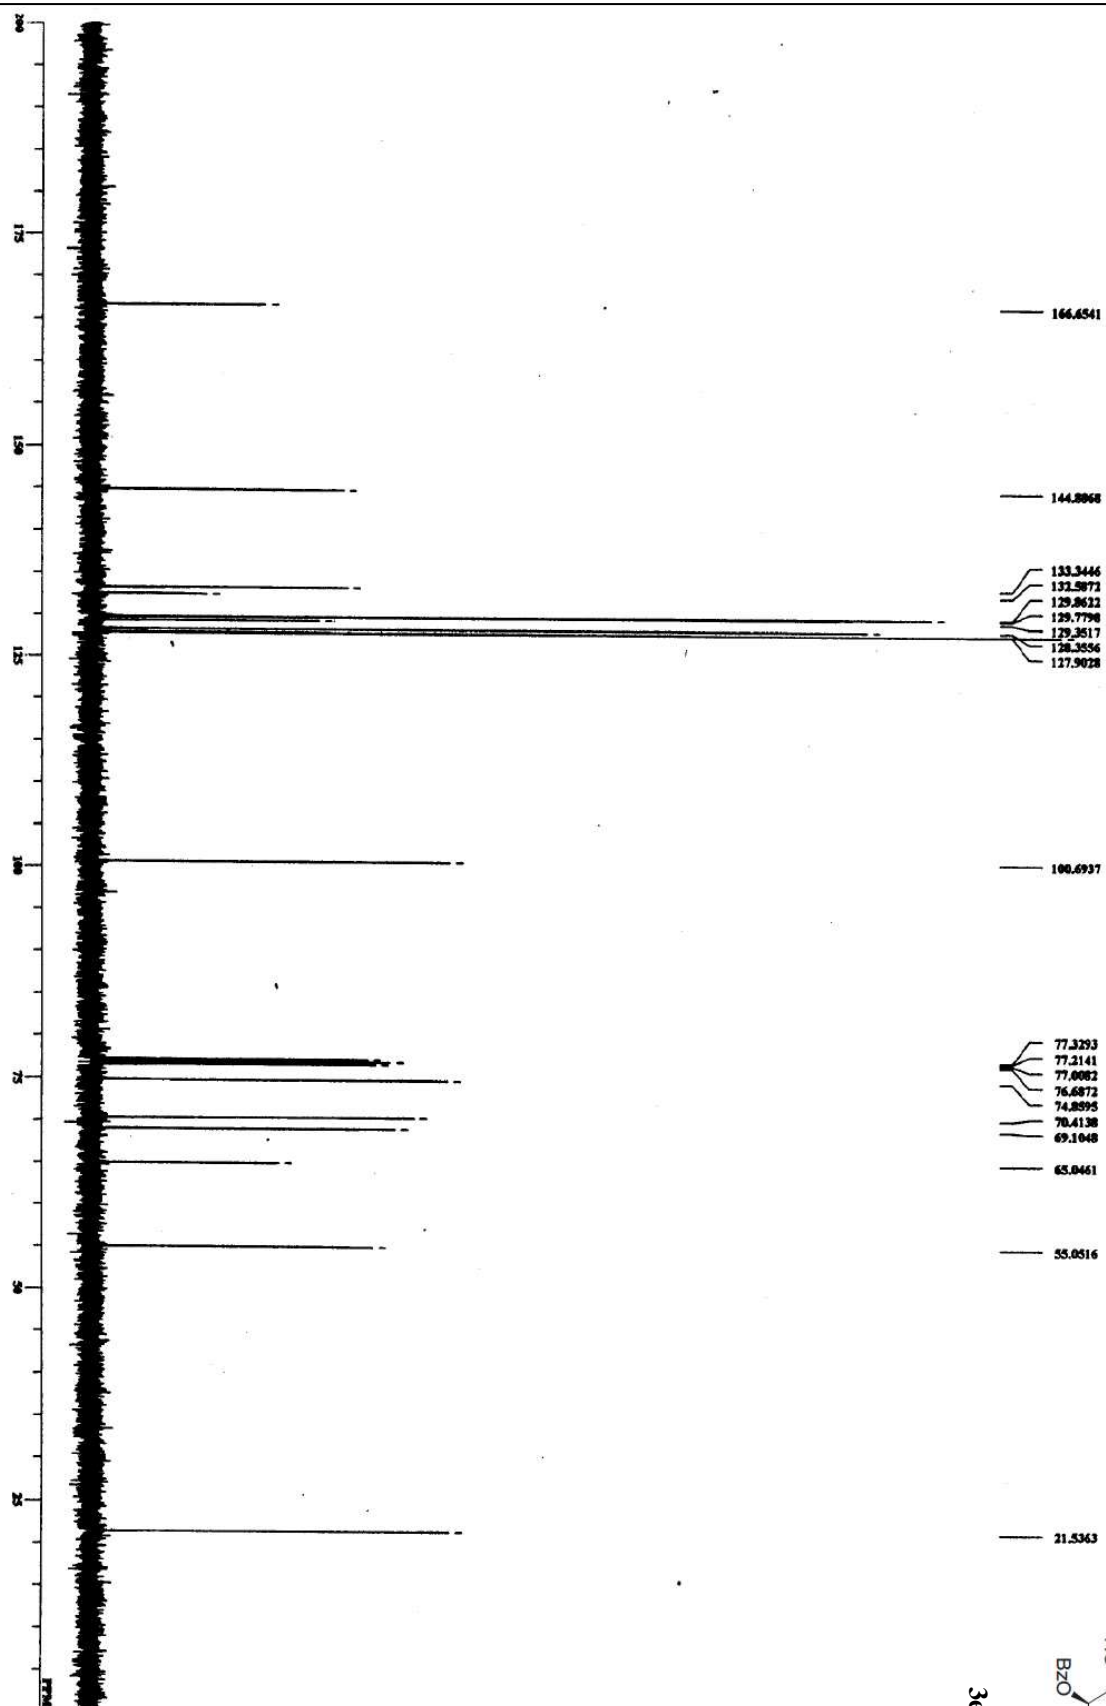

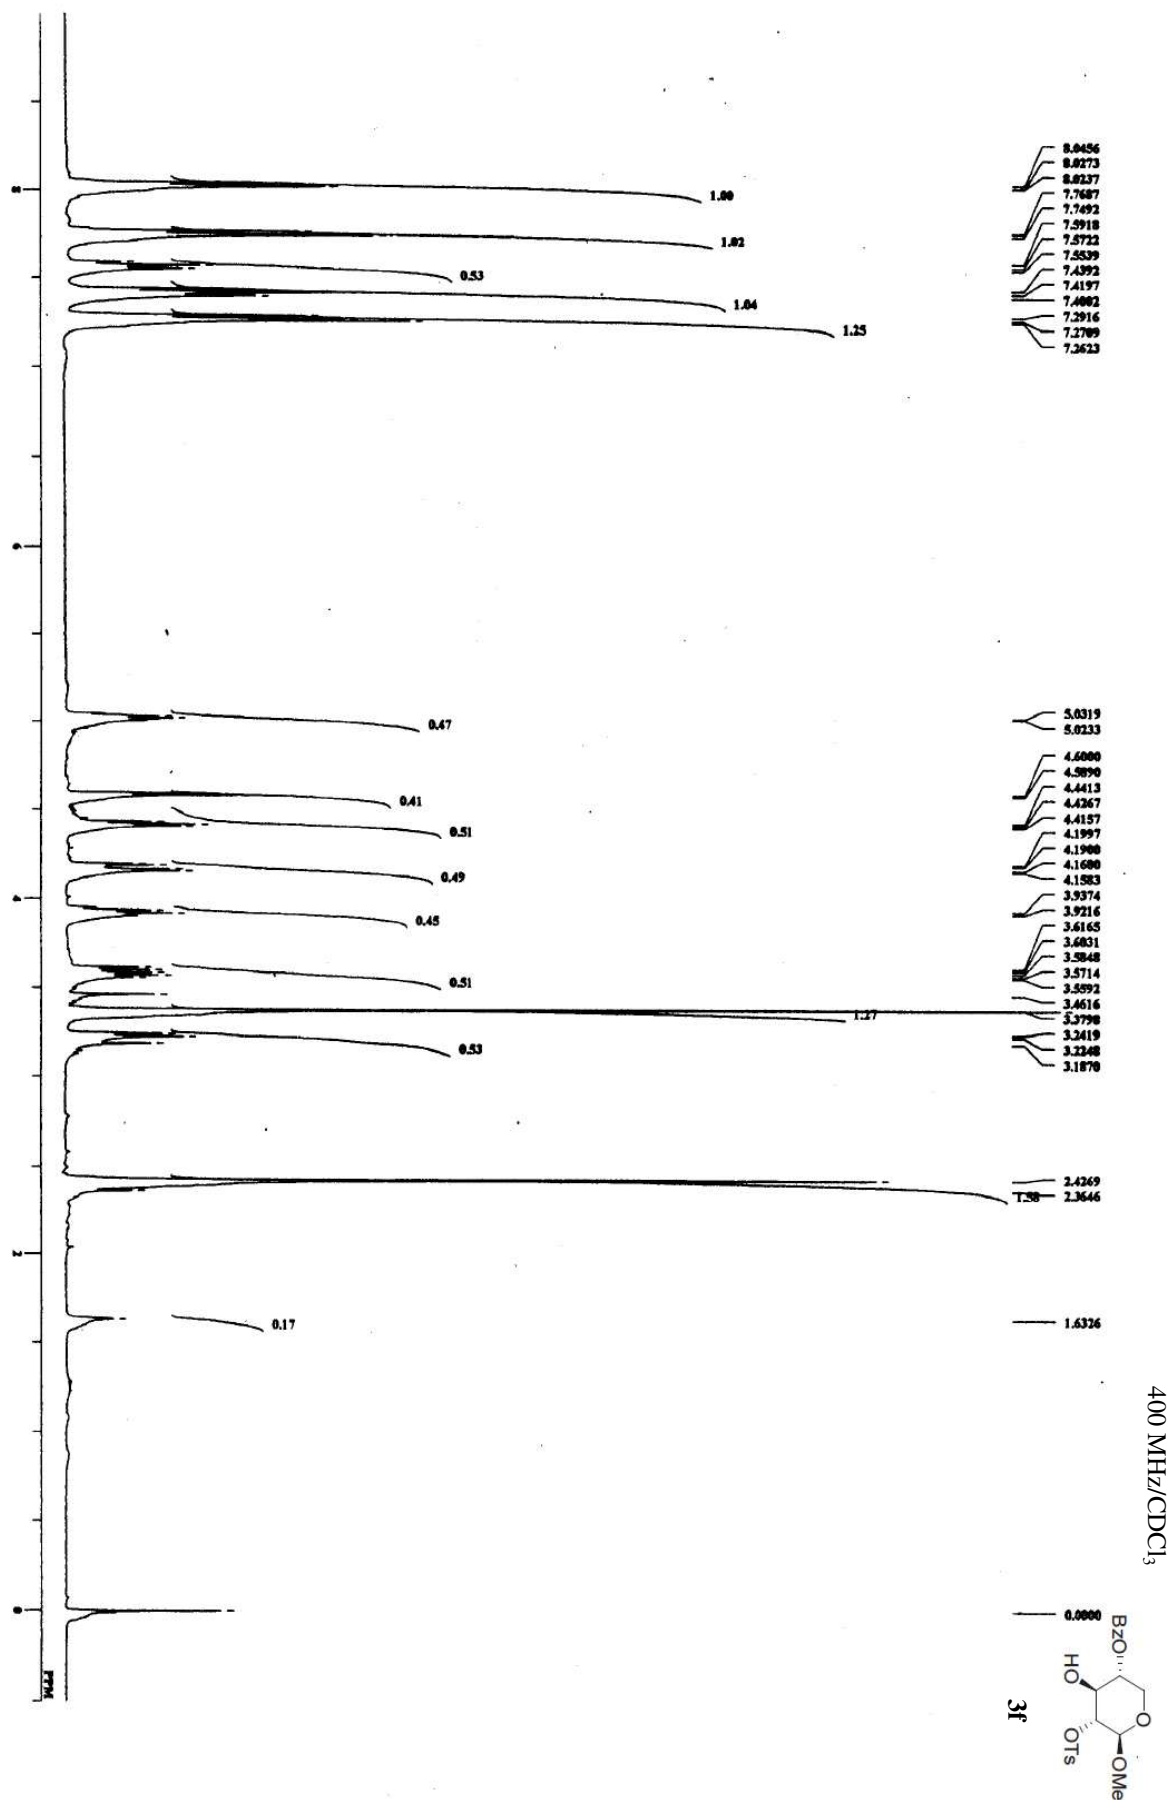

75 MHz/CDCl<sub>3</sub>

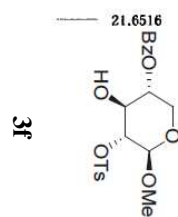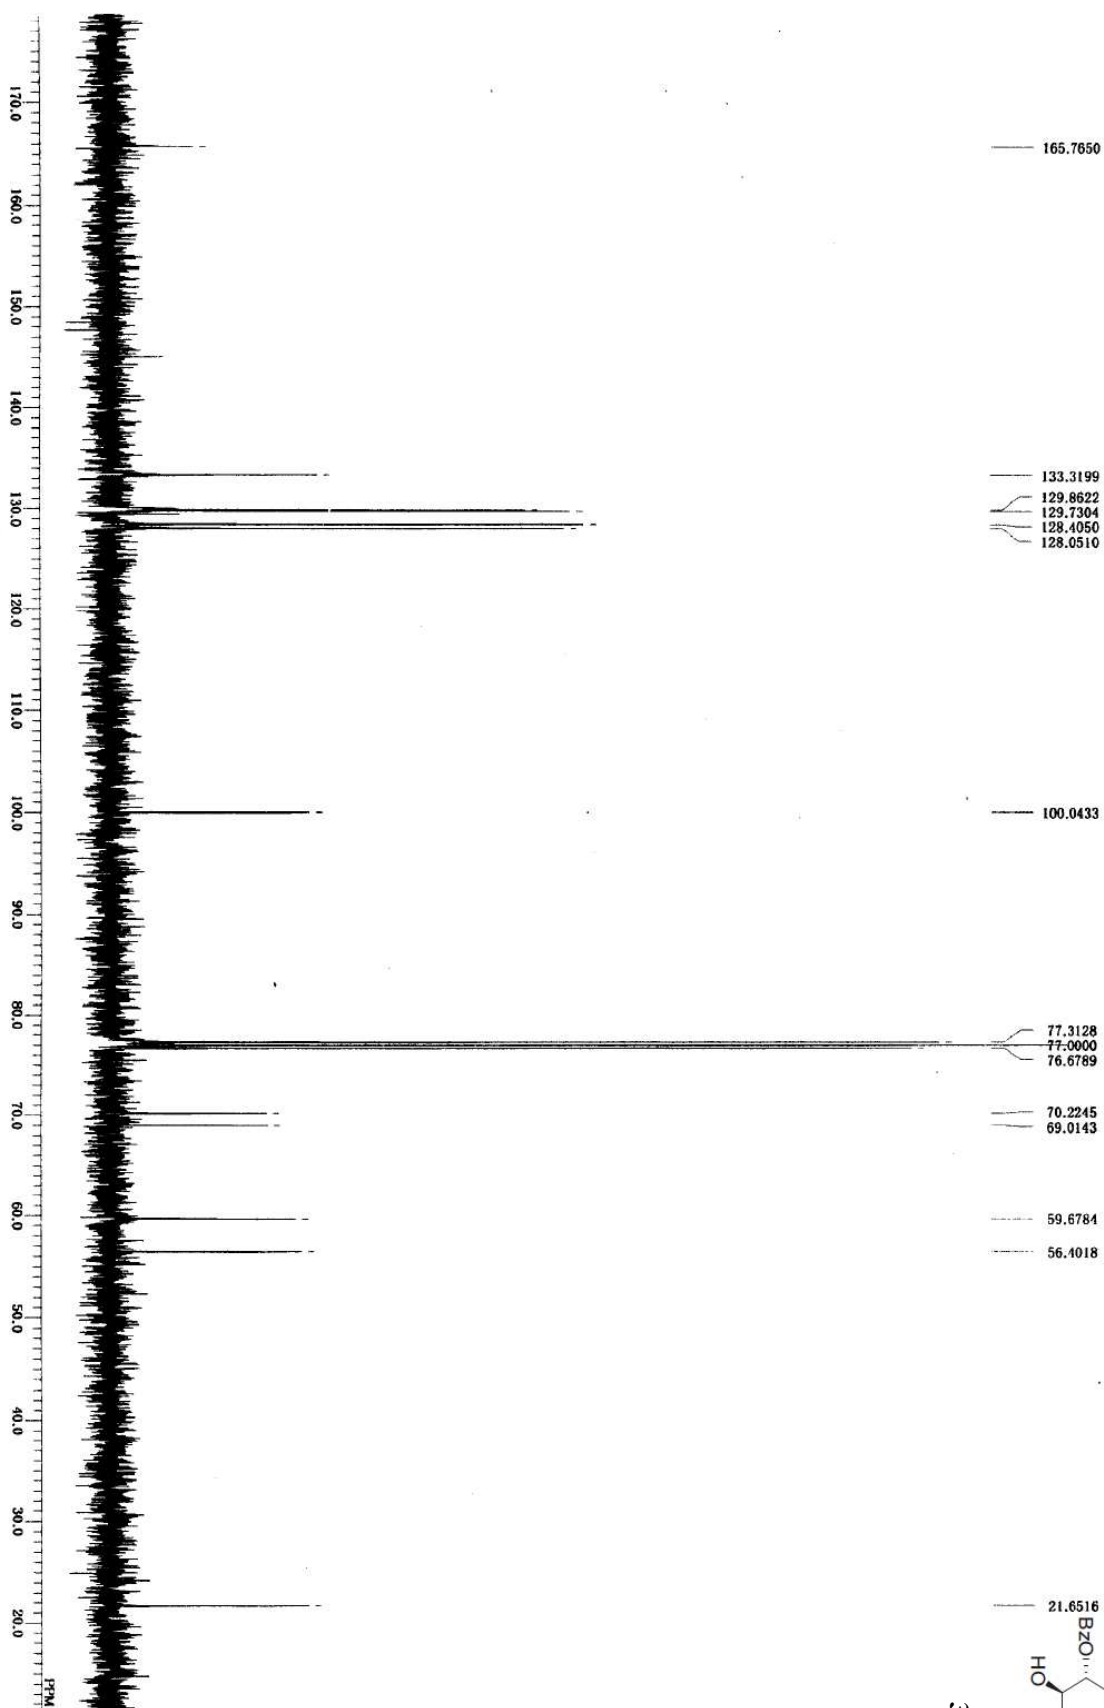

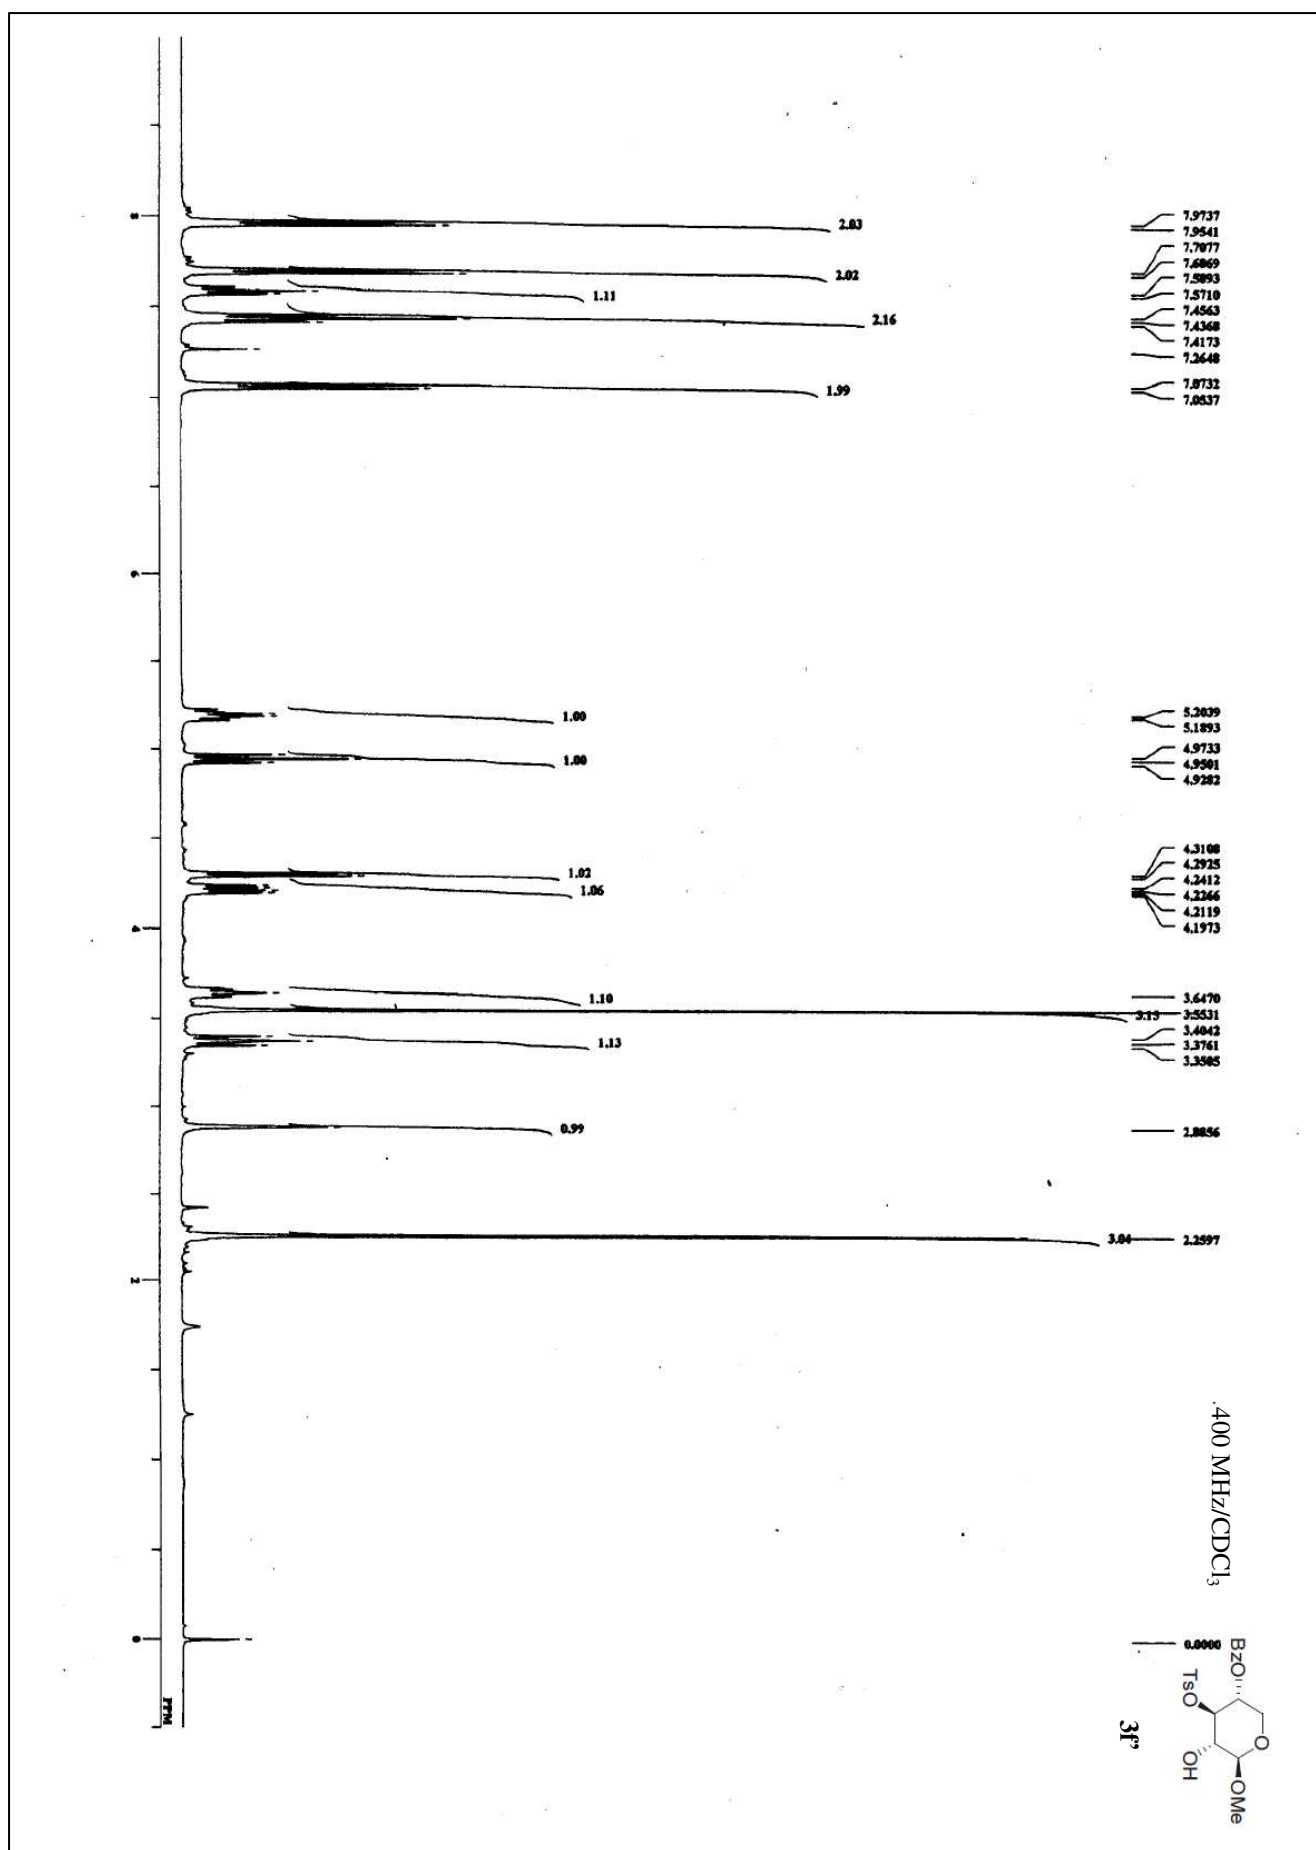

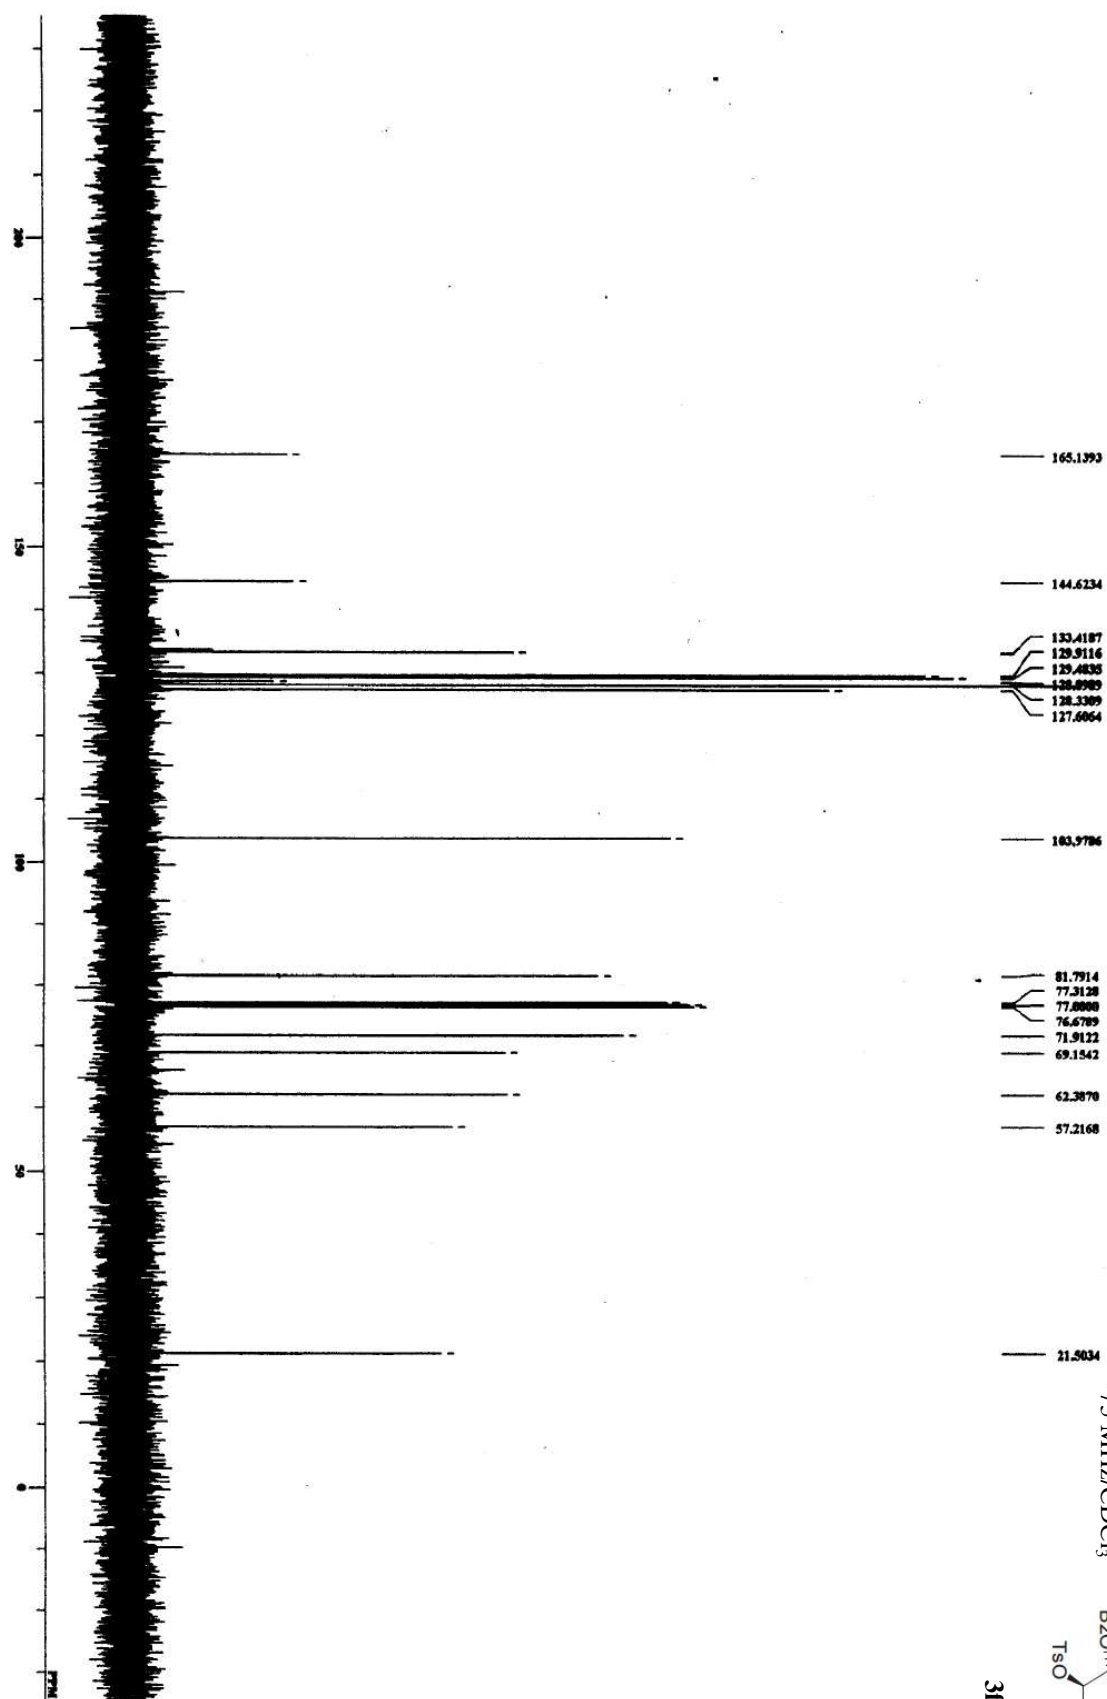

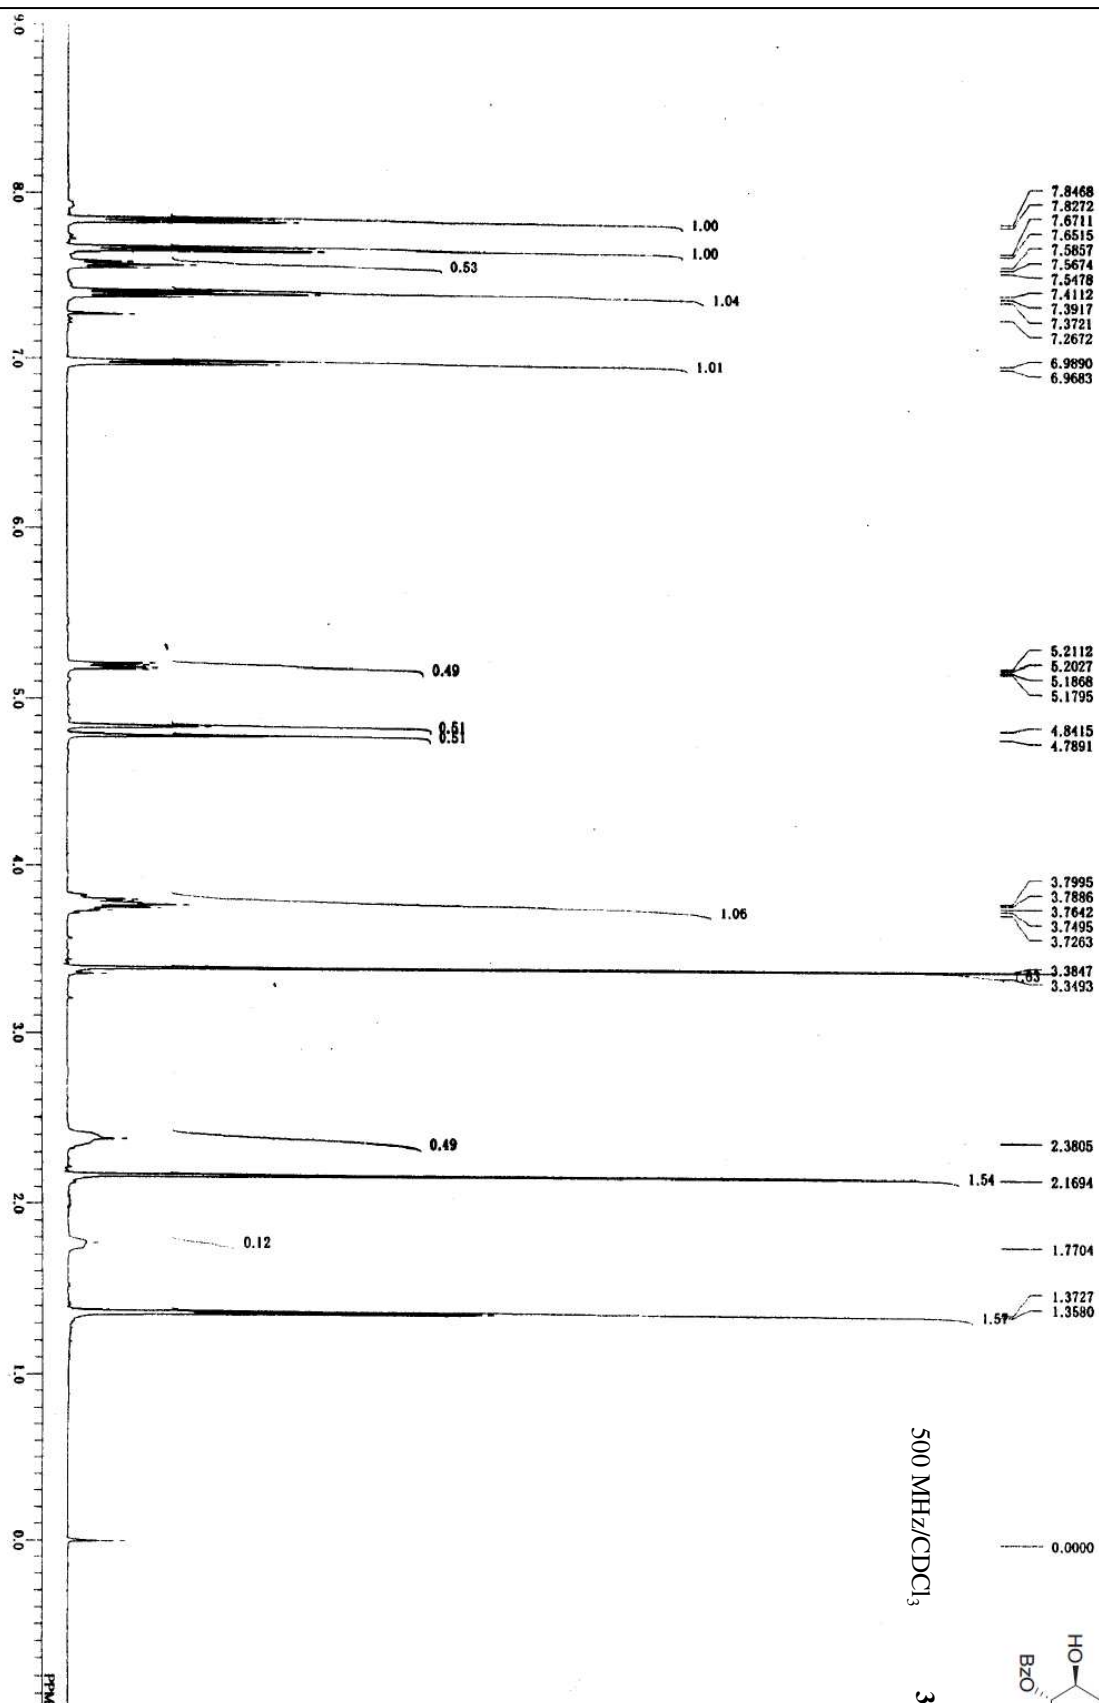

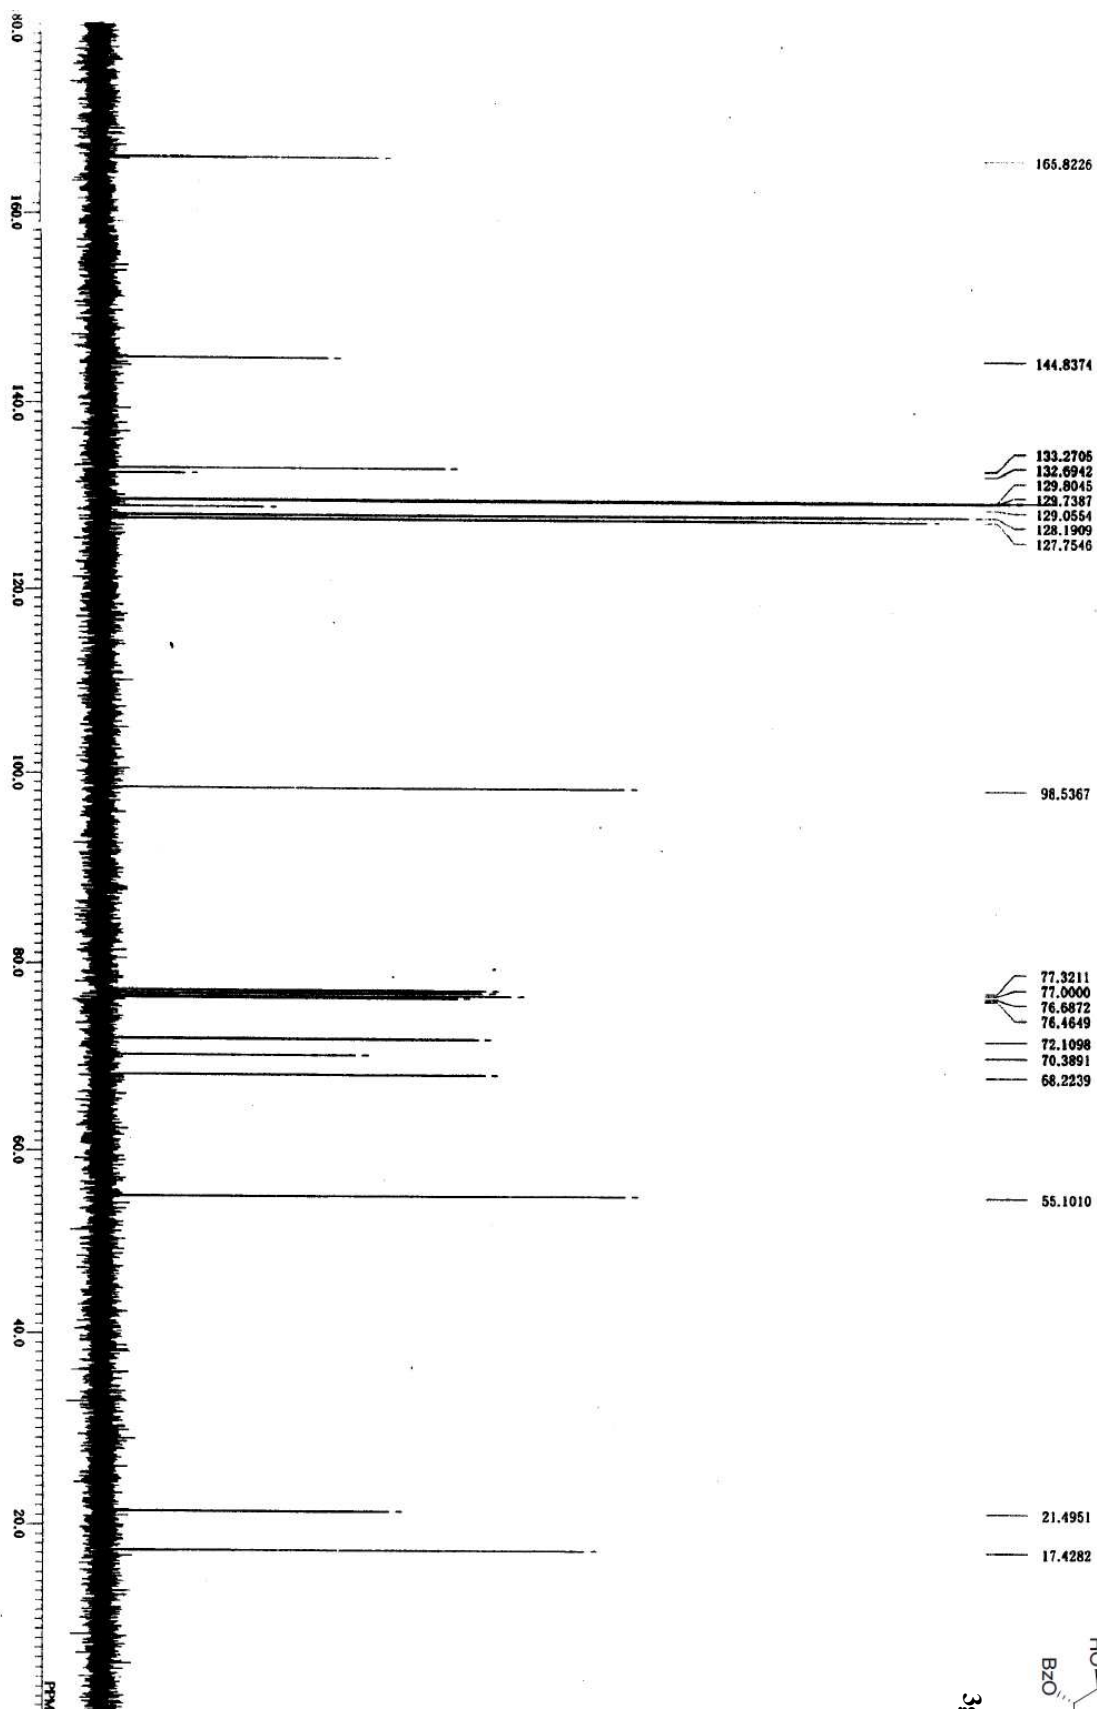

300 MHz/CDCl<sub>3</sub>

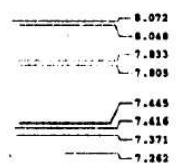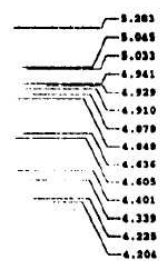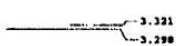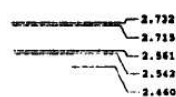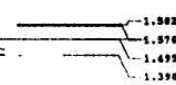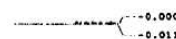

4

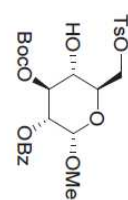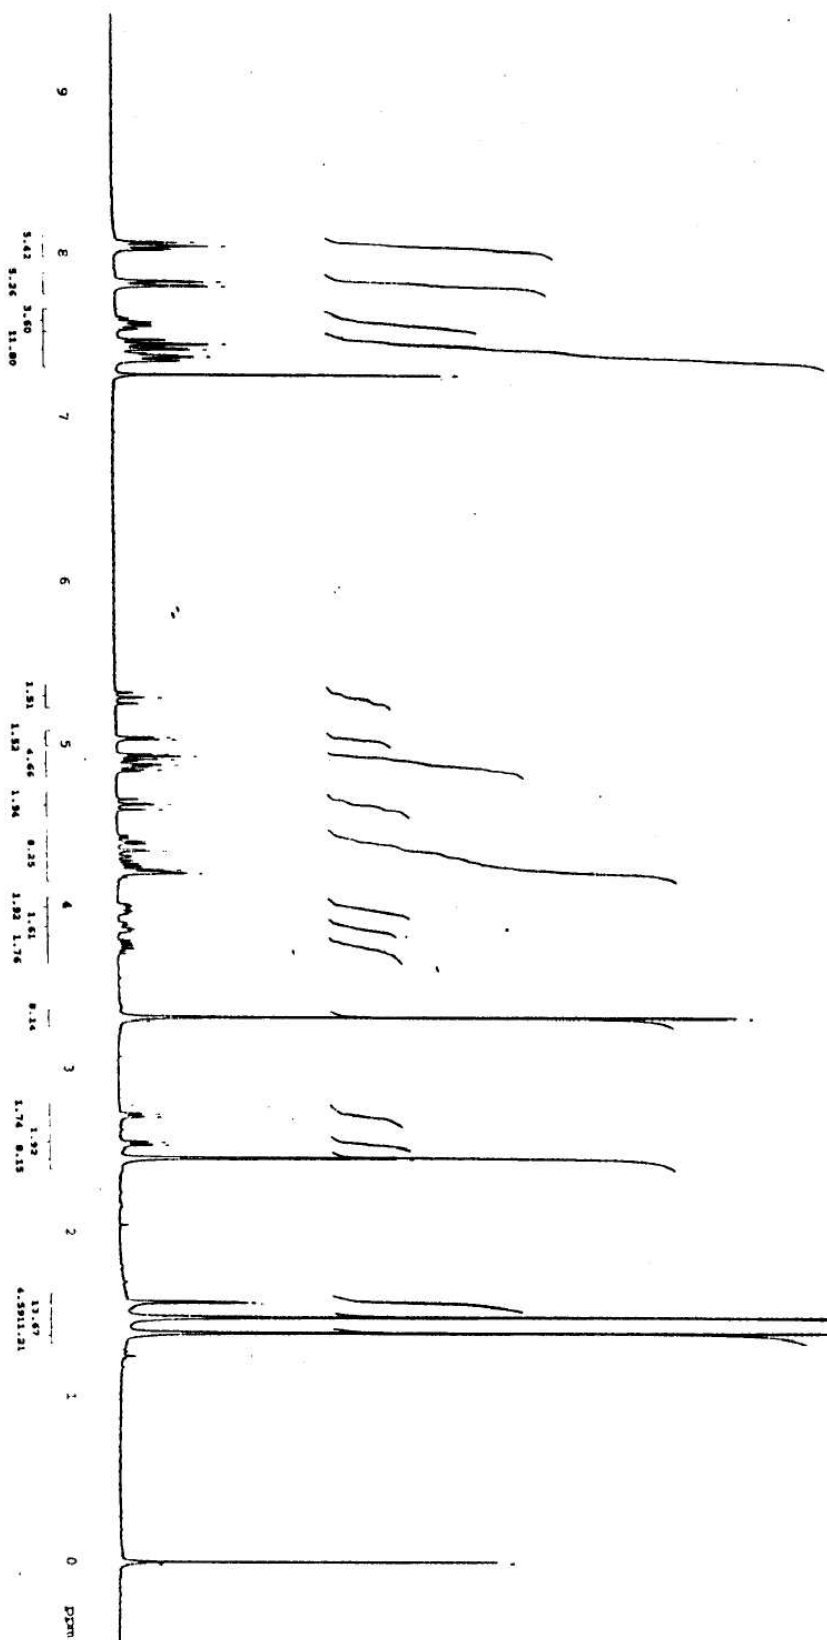

75 MHz/ $\text{CDCl}_3$

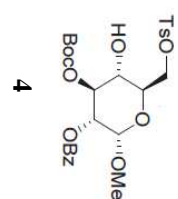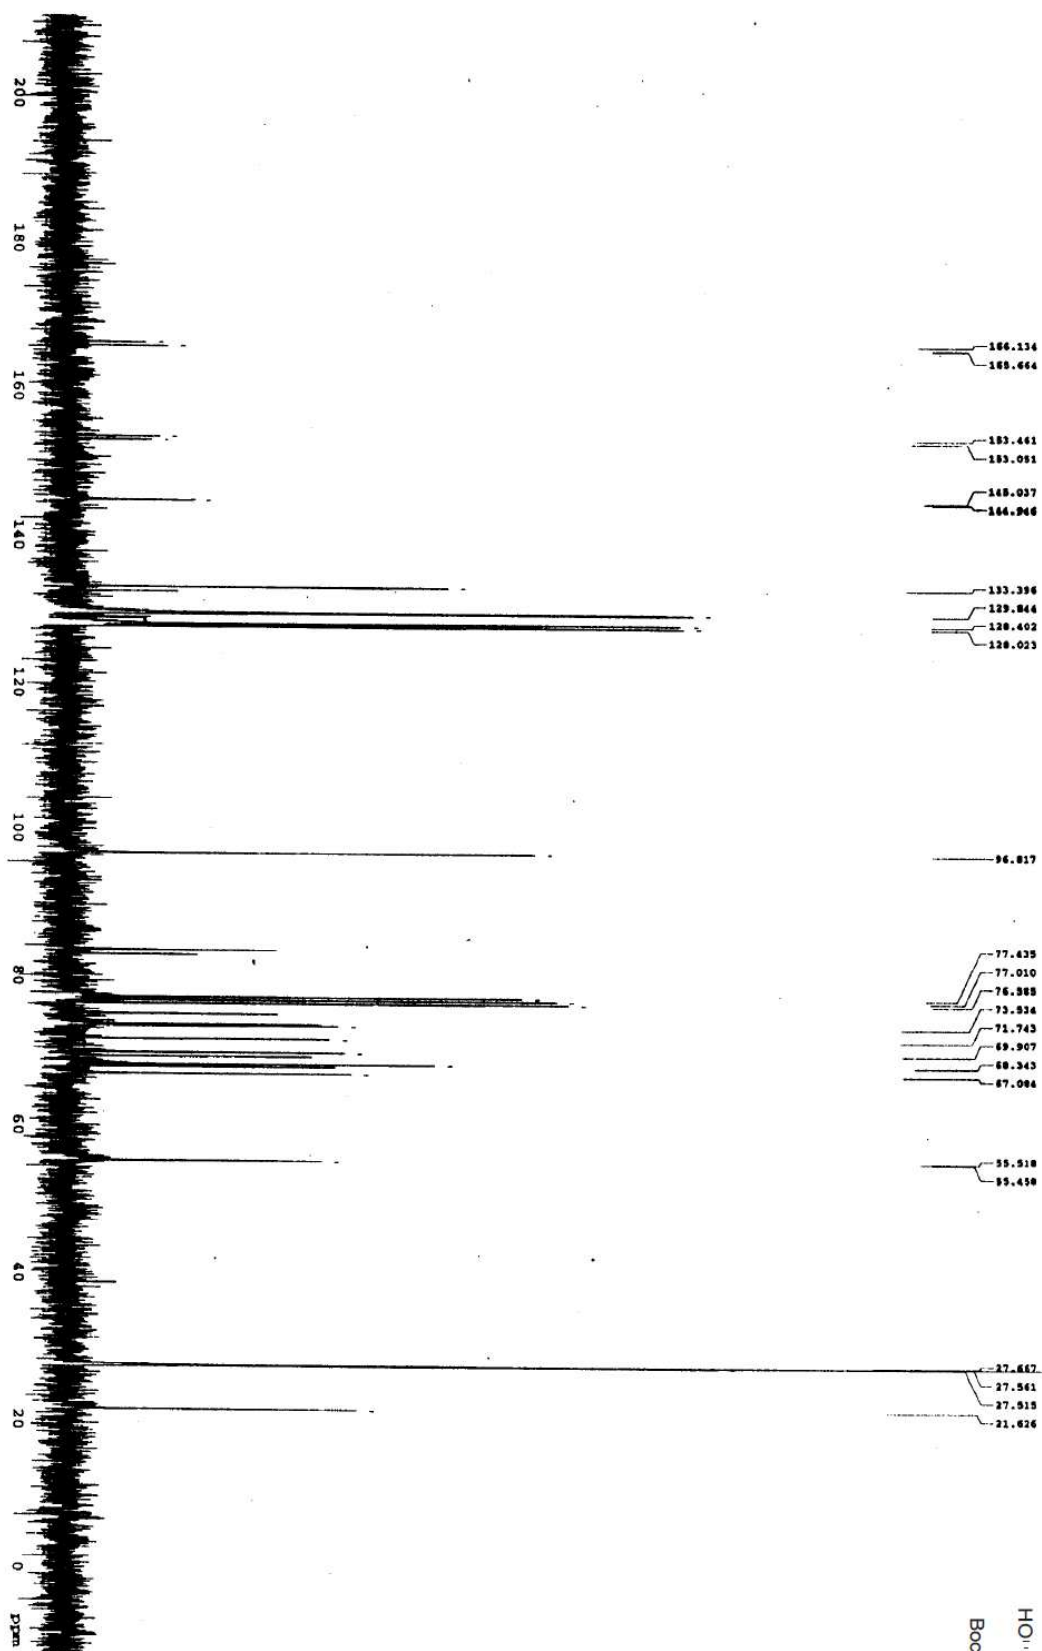

300 MHz/ $\text{CDCl}_3$ 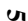

75 MHz/CDCl<sub>3</sub>

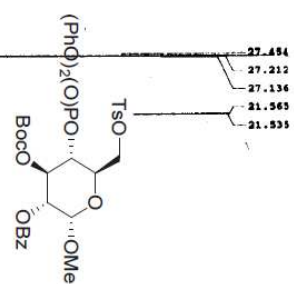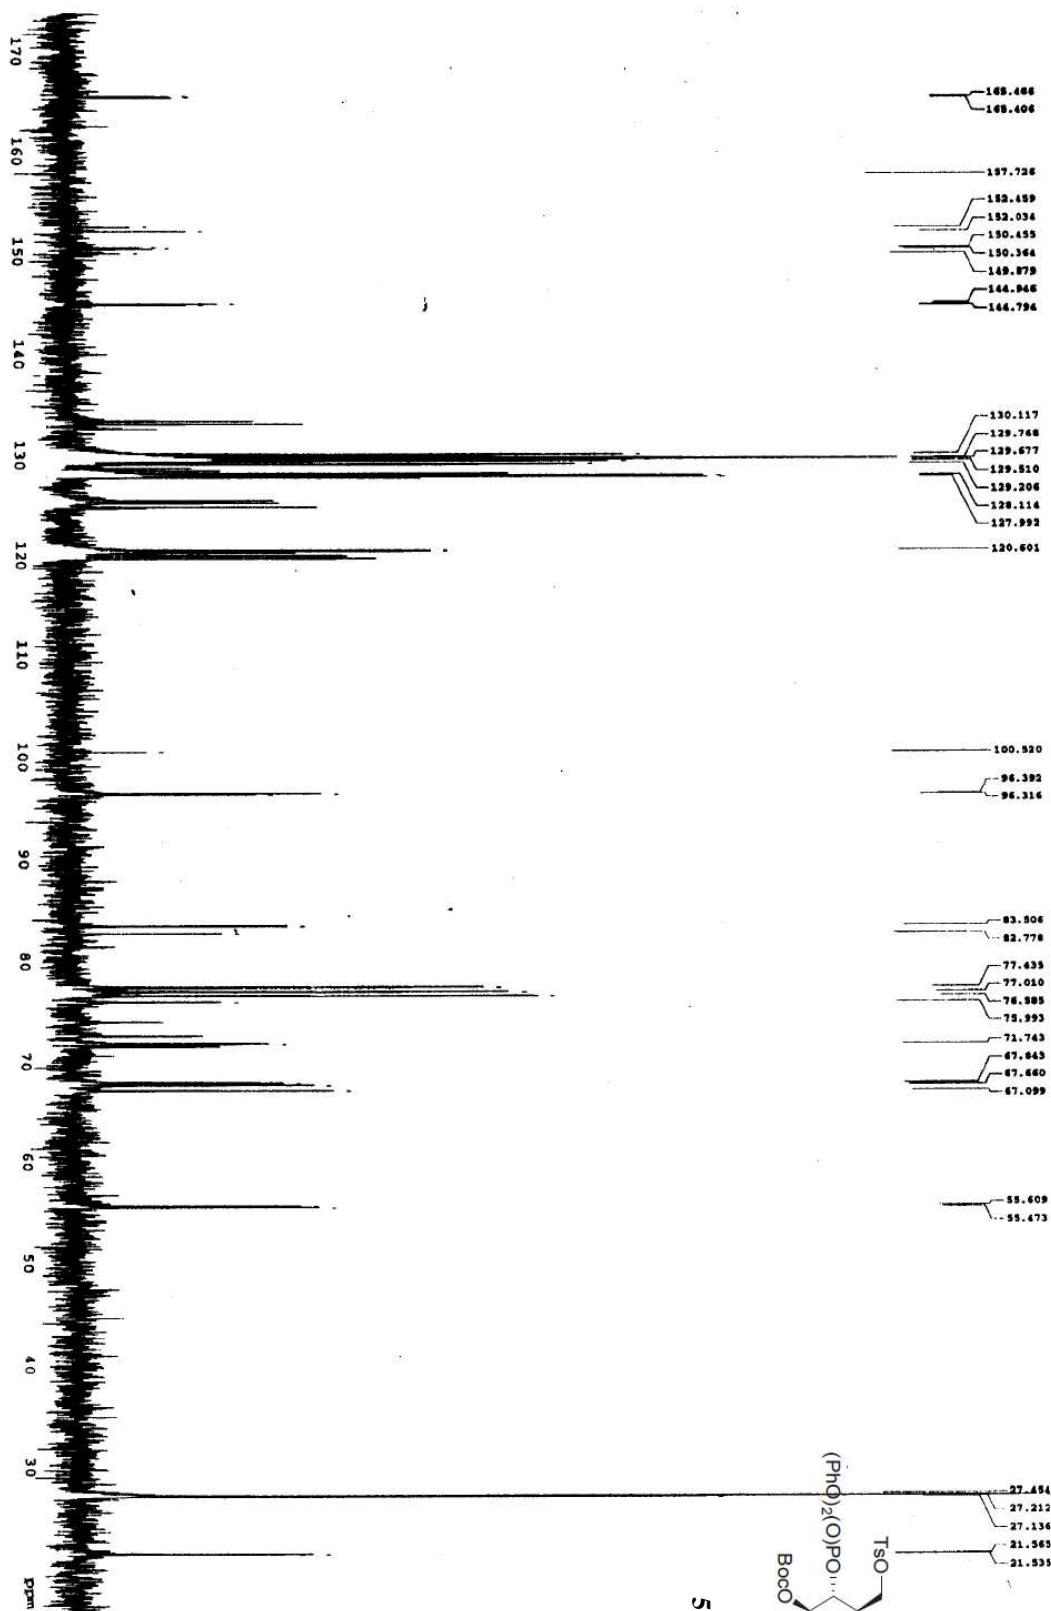

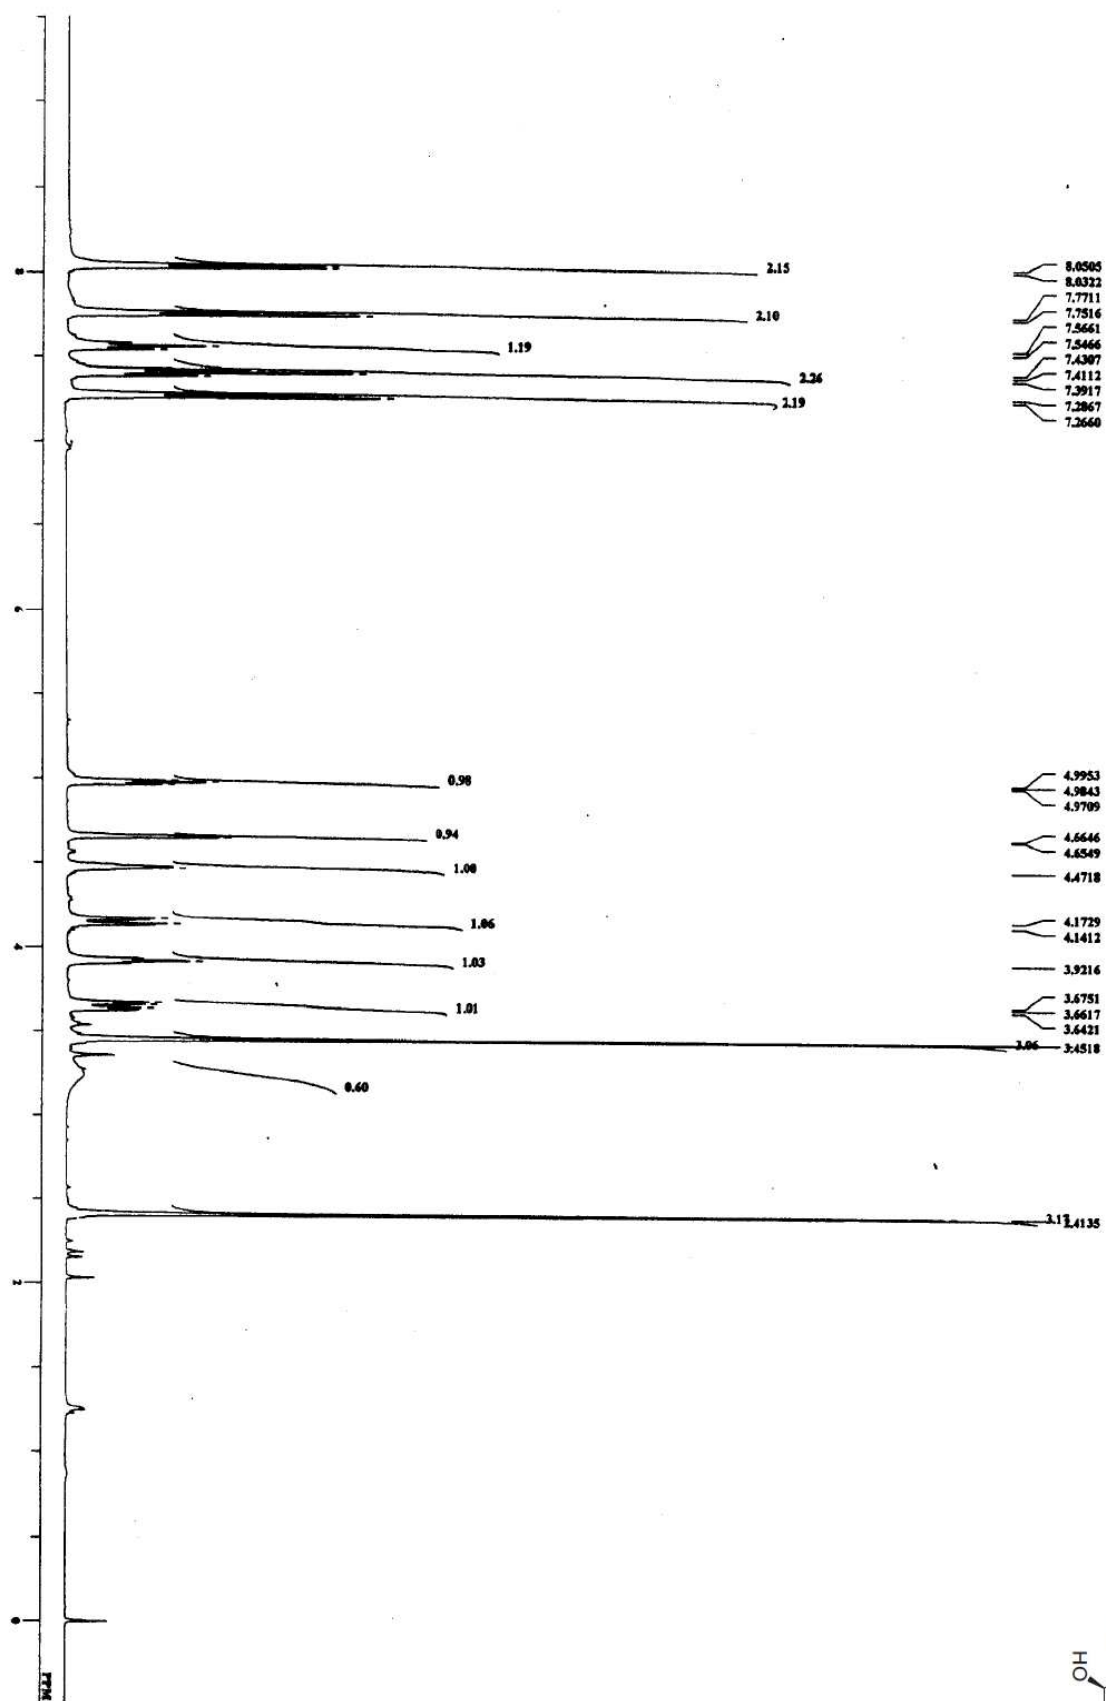

75 MHz/CDCl<sub>3</sub>

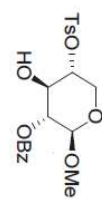

6

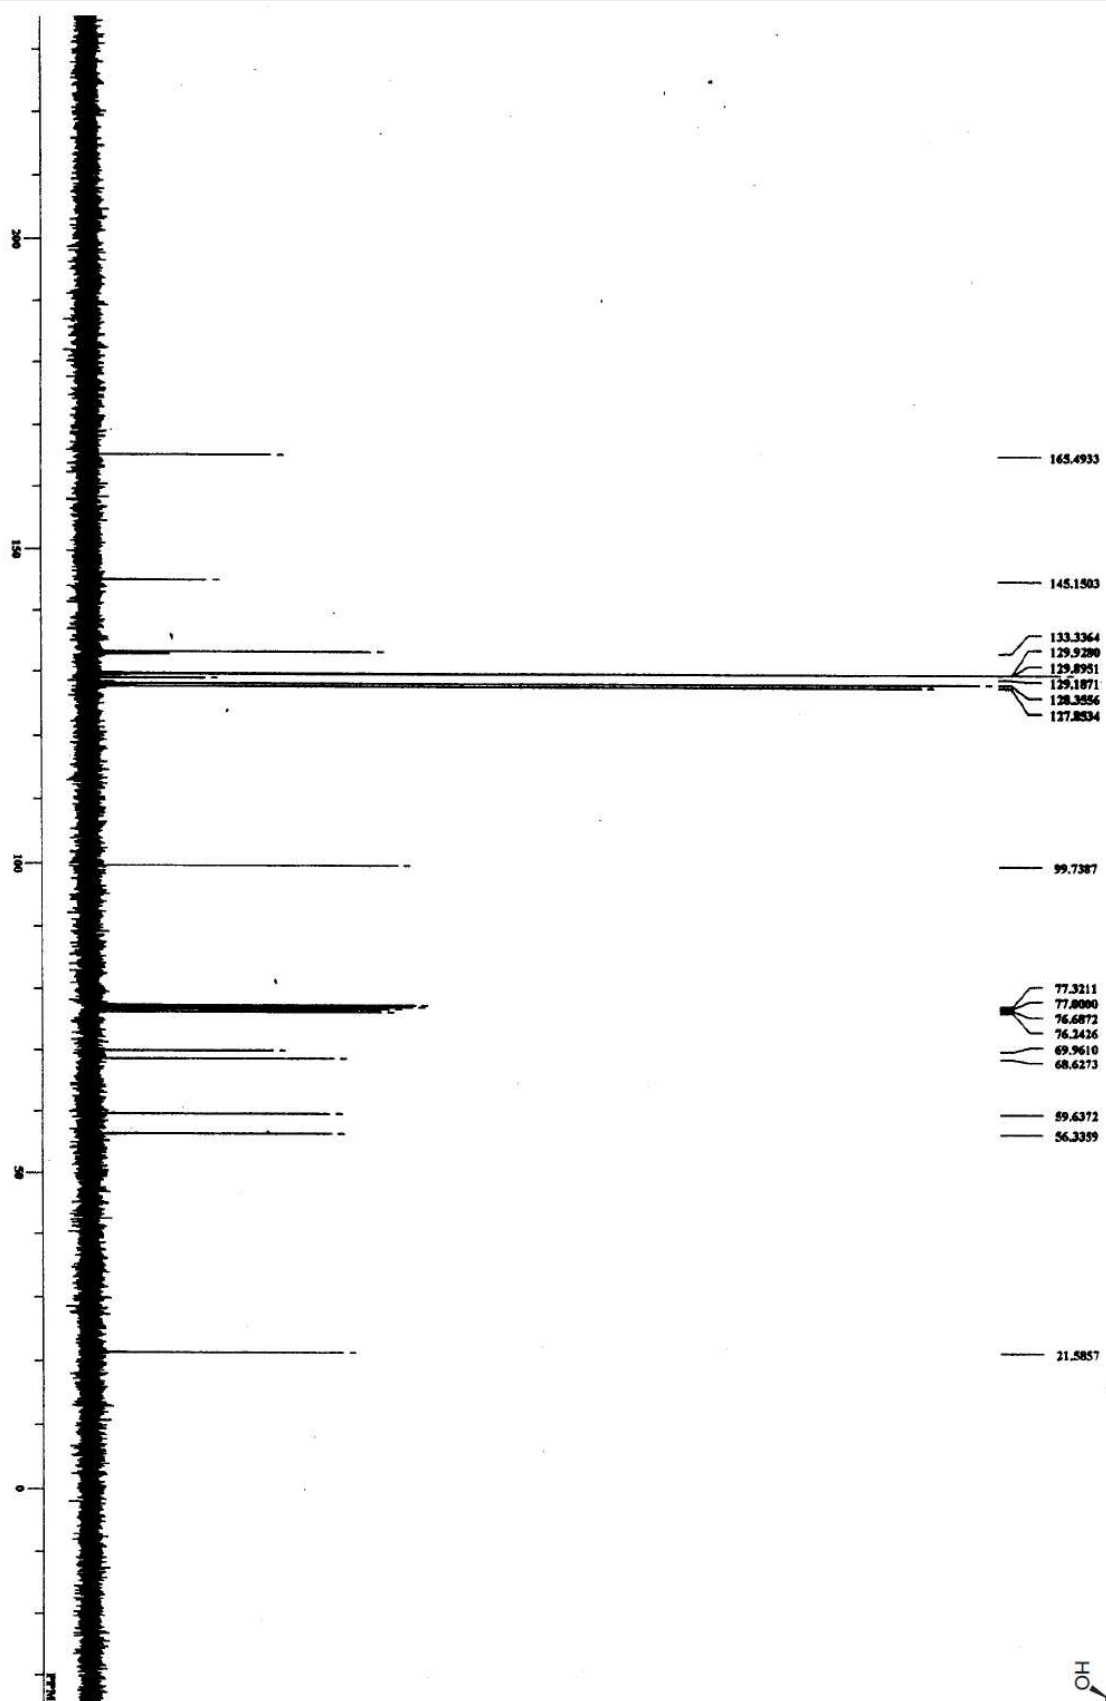

300 MHz/CDCl<sub>3</sub>

7

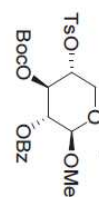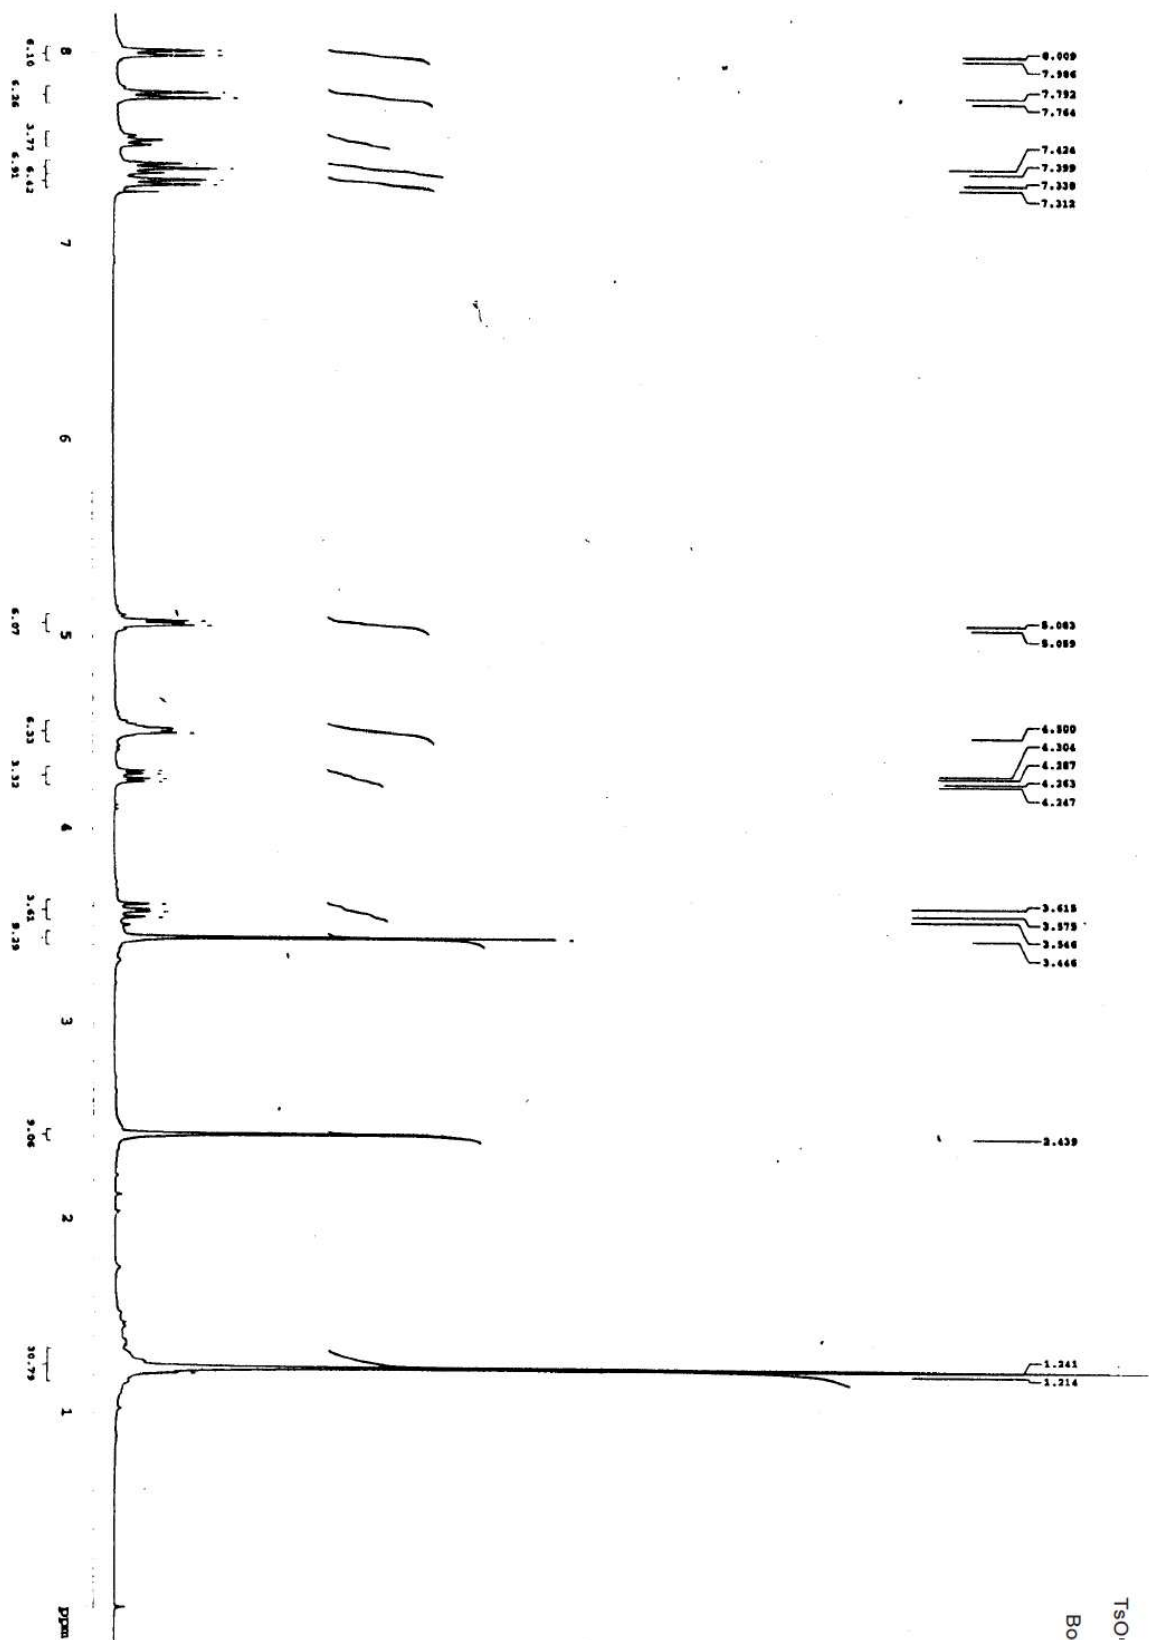

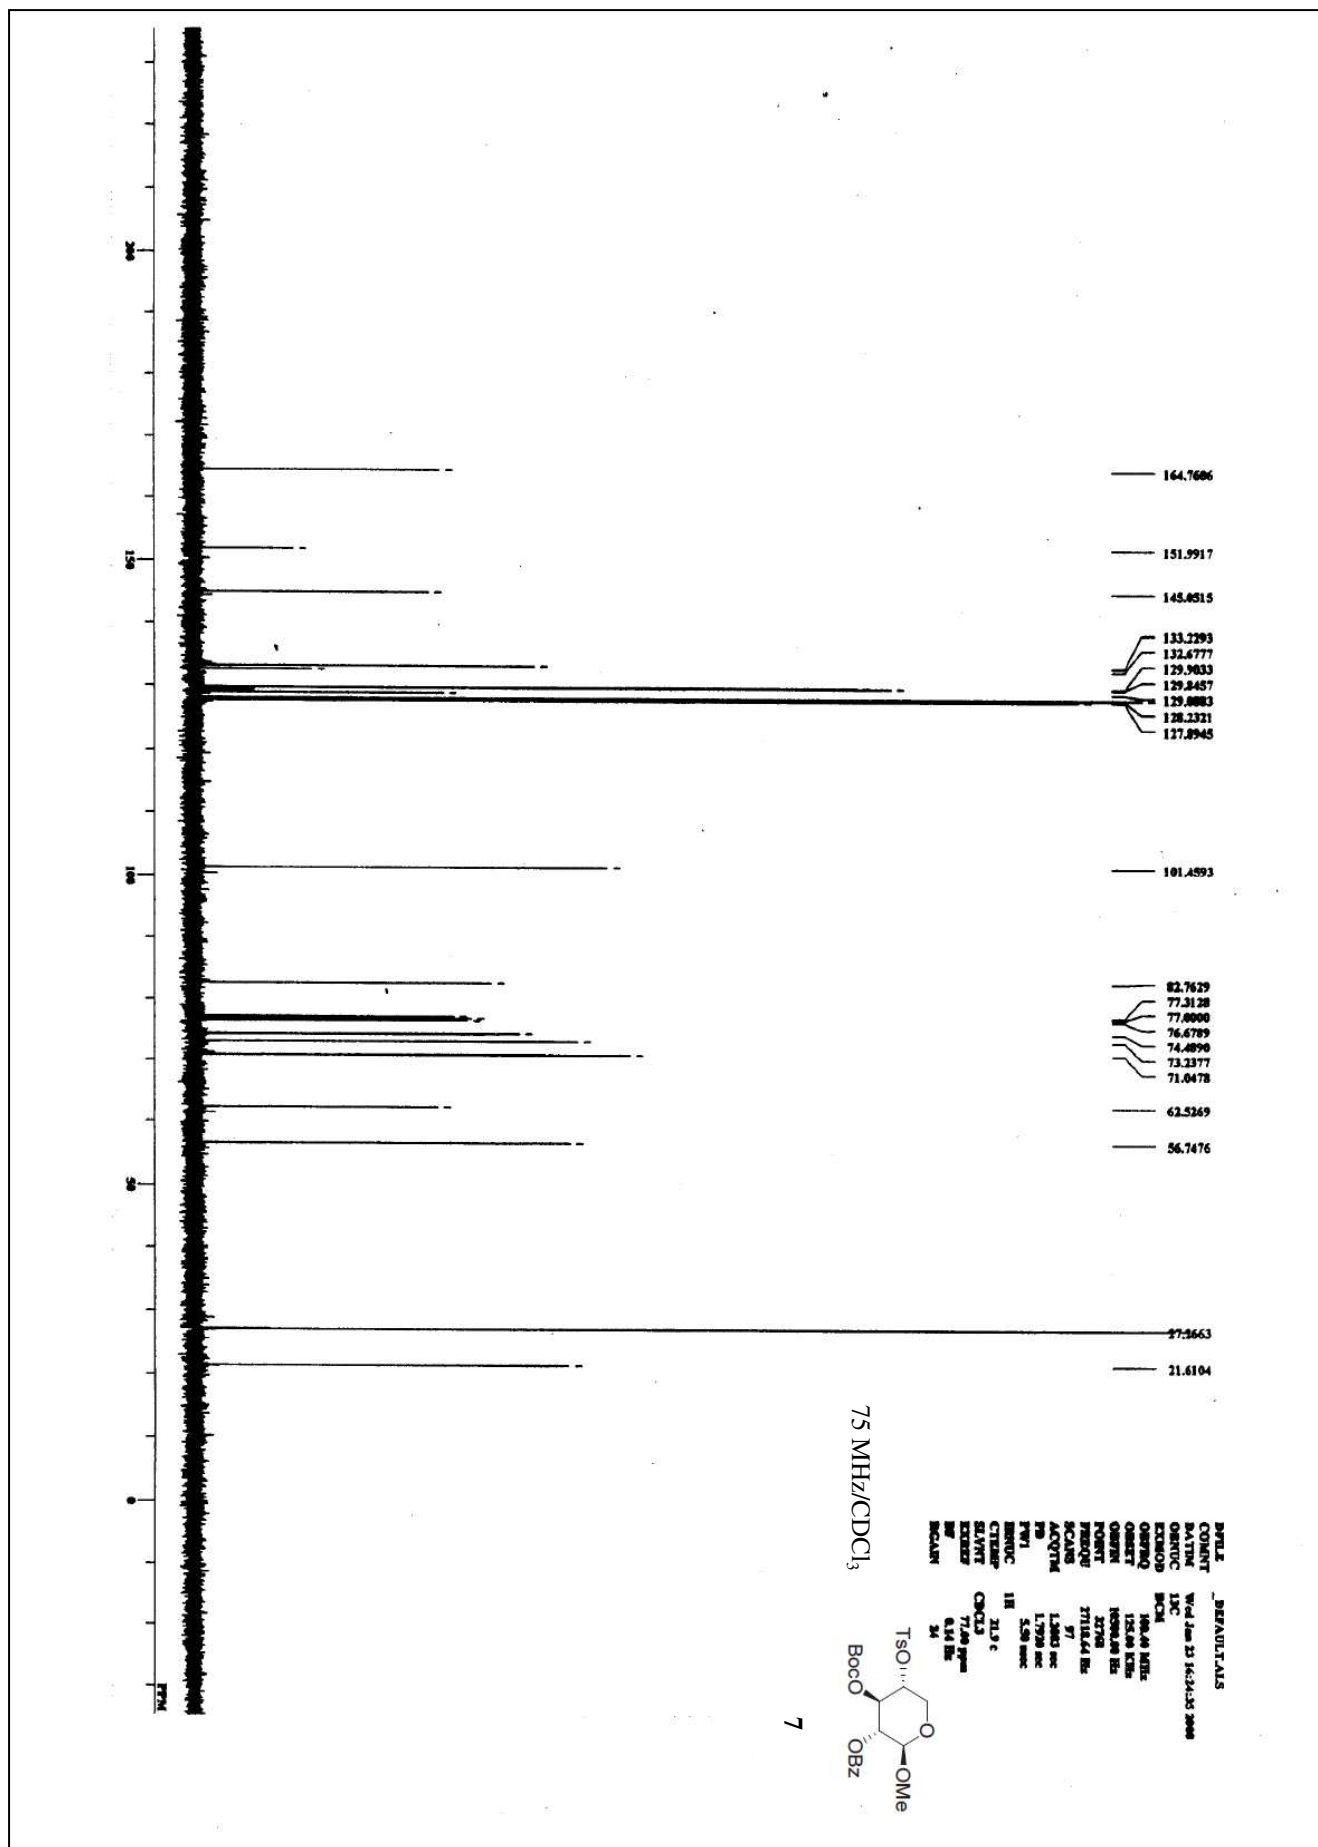

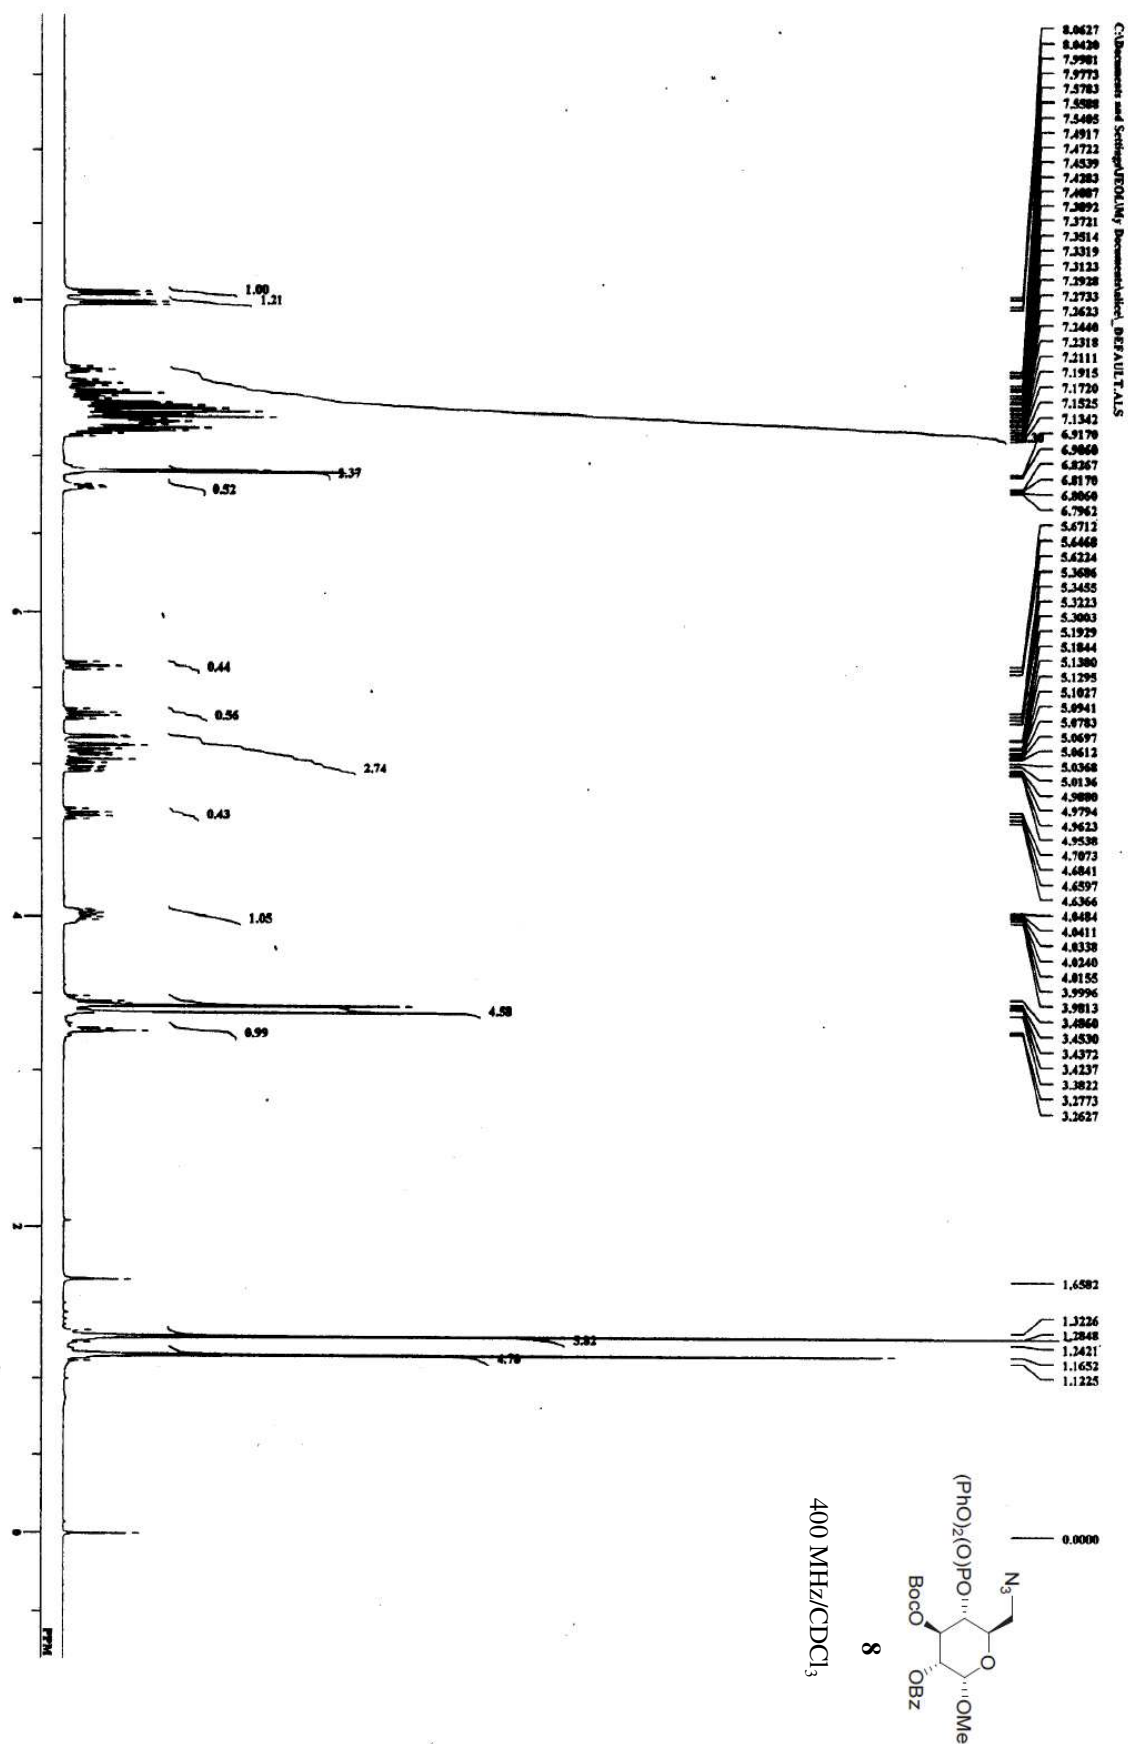

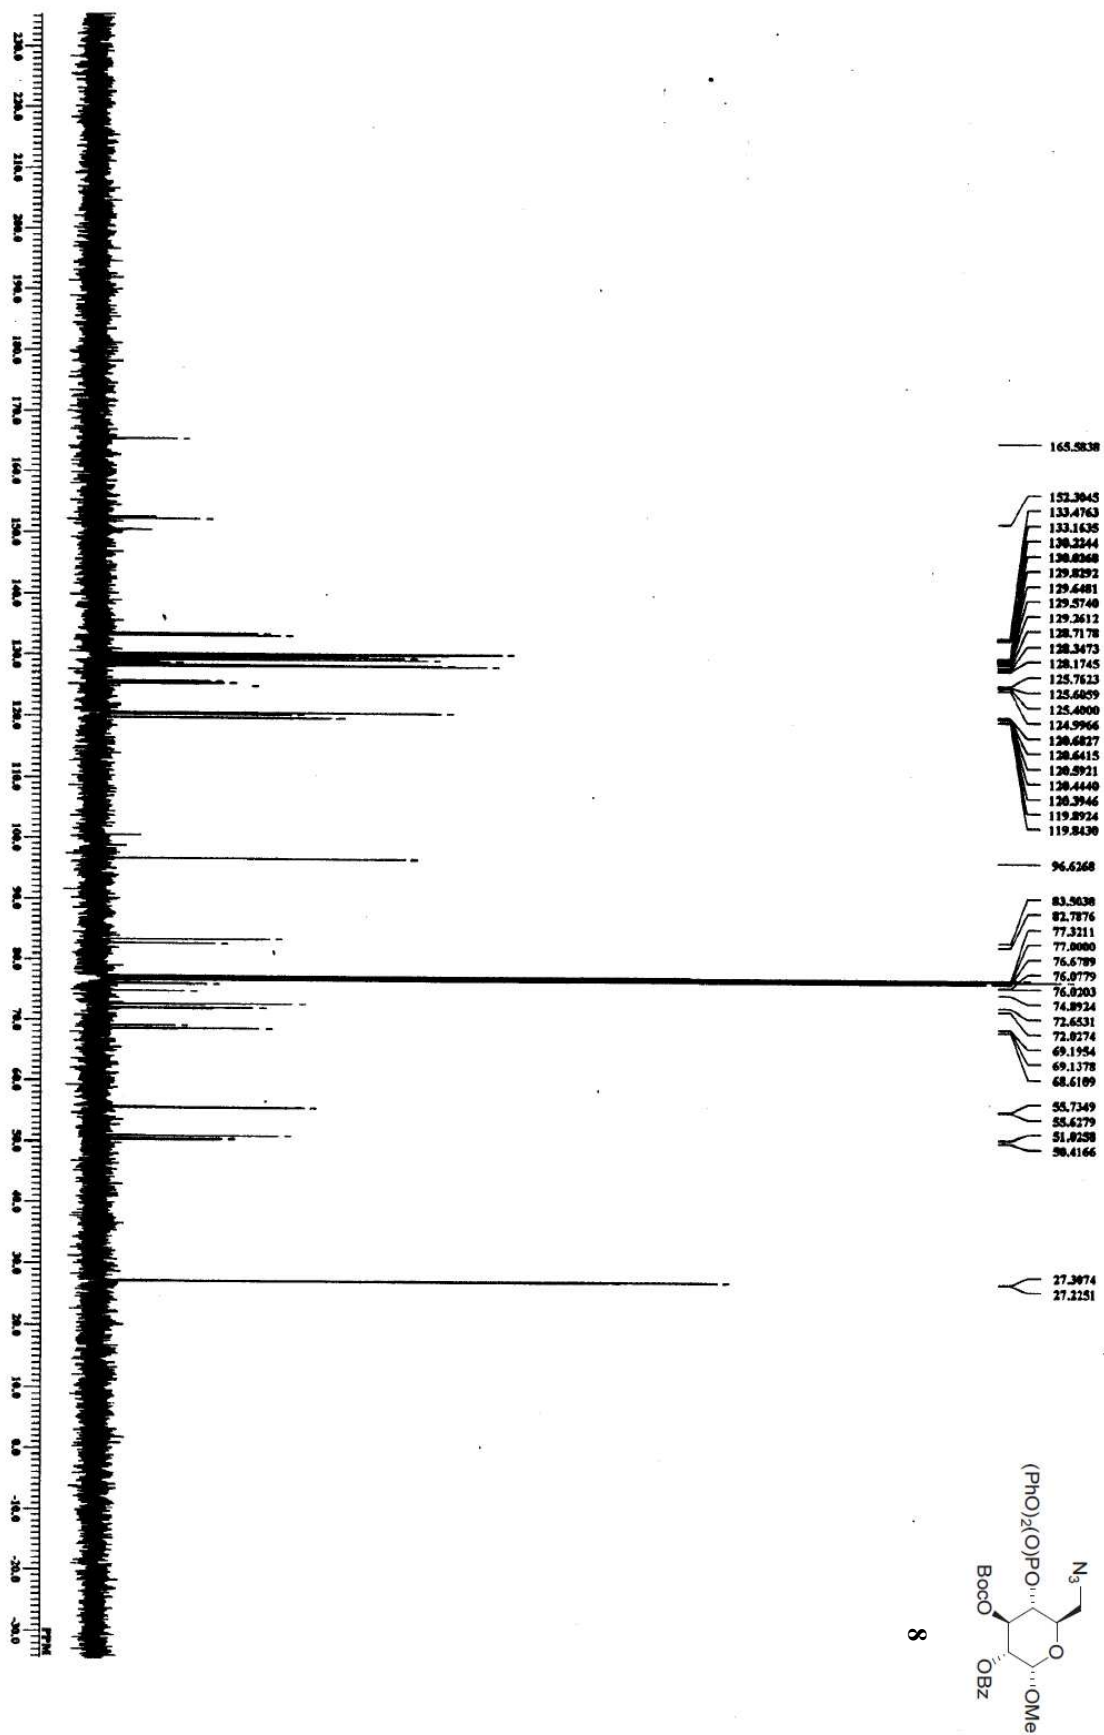

300 MHz/CDCl<sub>3</sub>

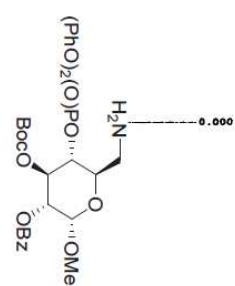

9

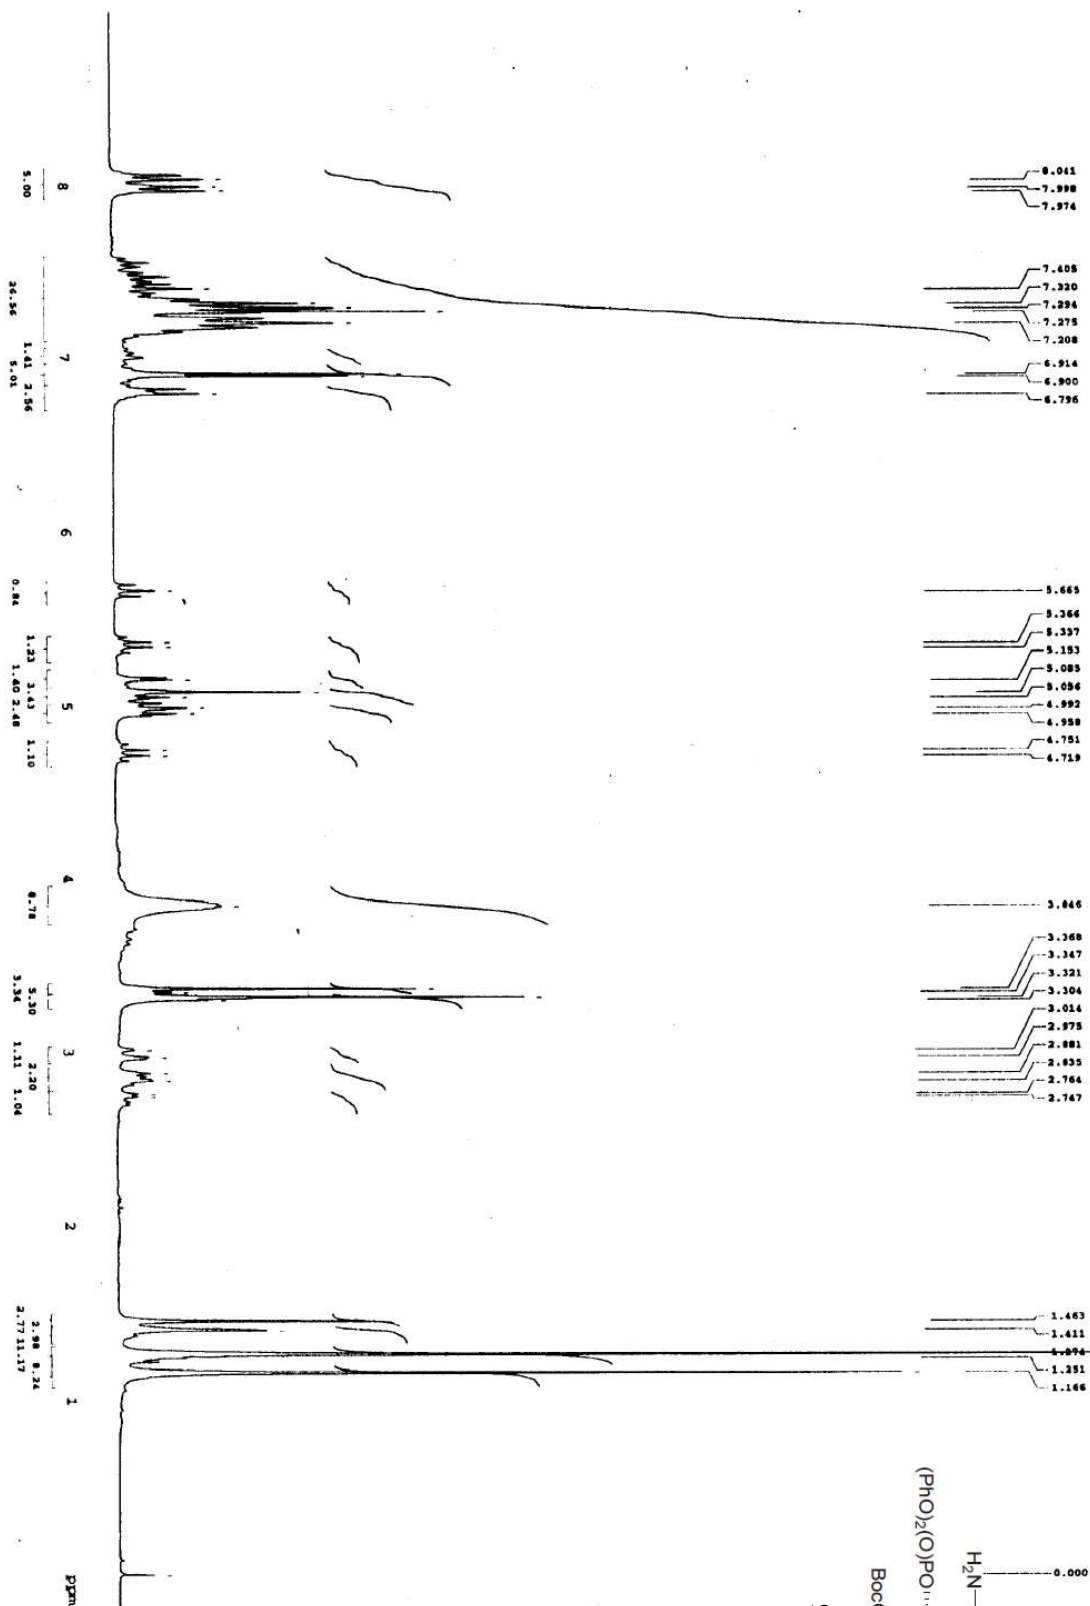

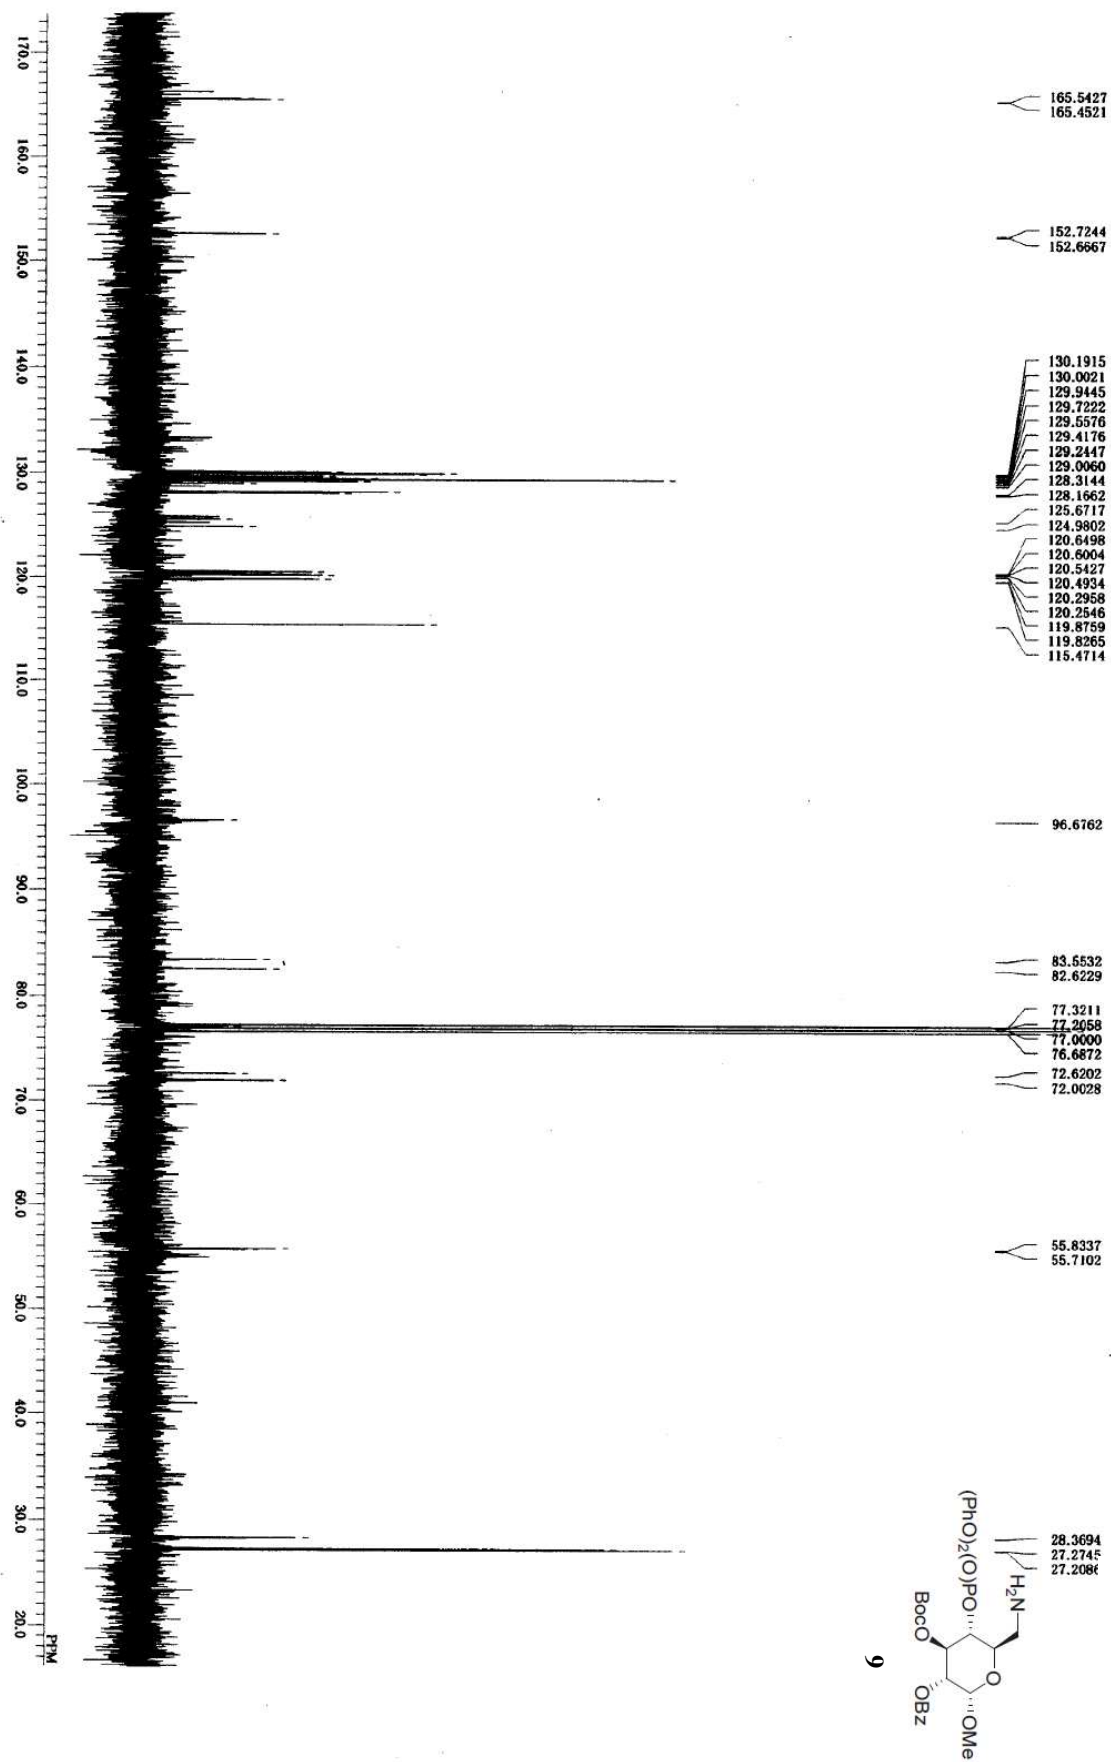

9

300 MHz/CDCl<sub>3</sub>

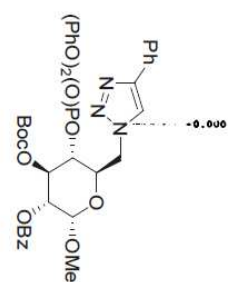

10

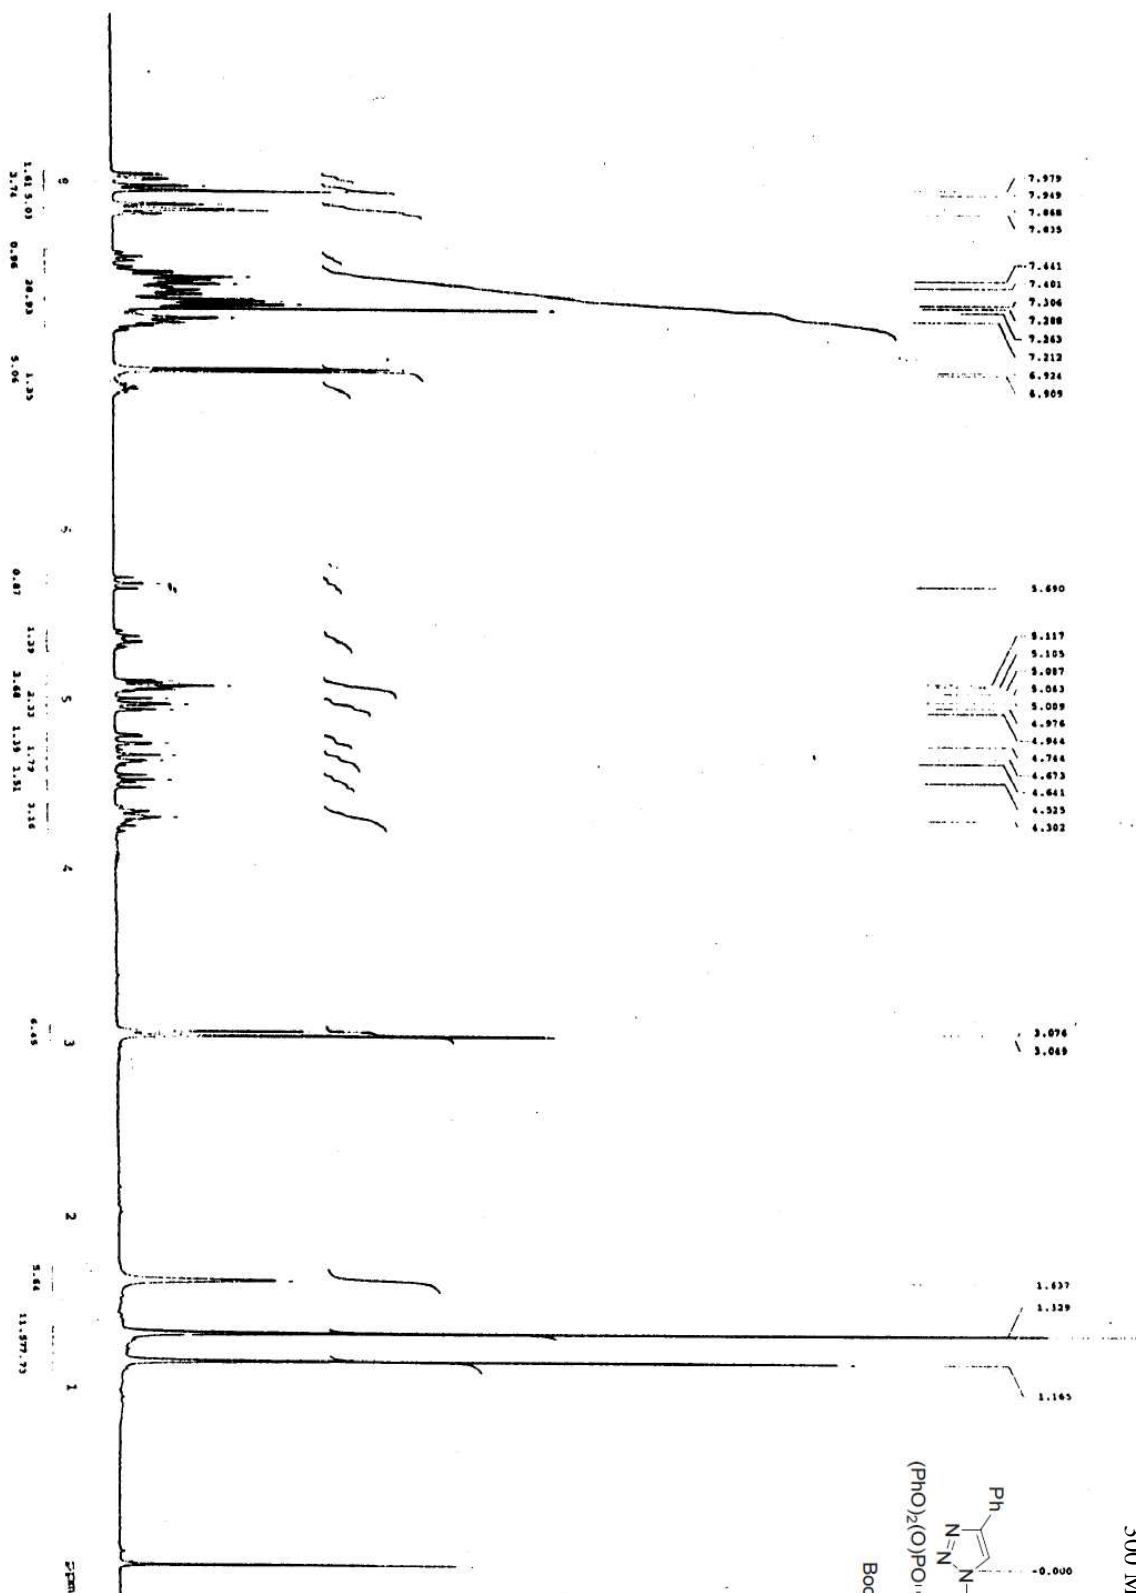

Supplement: Supplementary file 1 [file 4600861]
